# Supplementary material for: Acidic-functionalized ionic liquid as an efficient, green and reusable catalyst for hetero-Michael addition of nitrogen, sulfur and oxygen nucleophiles to α,β-unsaturated ketones
Source: Royal Society of Chemistry journal article supplement (doi:10.1039/c1ob06346d), 2011-09-27

**Supporting Information for:**

**Acidic-functionalized ionic liquid as an efficient, green and reusable  
catalyst for hetero-Michael addition of nitrogen, sulfur and oxygen  
nucleophiles to  $\alpha,\beta$ -unsaturated ketones**

**Feng Han,<sup>a,b</sup> Lei Yang,<sup>\*a</sup> Zhen Li,<sup>a</sup> Chungu Xia<sup>\*a</sup>**

<sup>a</sup> State Key Laboratory for Oxo Synthesis and Selective Oxidation, Lanzhou Institute of Chemical Physics, Chinese Academy of Sciences, and Graduate School of the Chinese Academy of Sciences, Lanzhou 730000, P. R. of China

<sup>b</sup> Graduate School of the Chinese Academy of Sciences, Beijing 100039, China

Fax: 86 931 827 7088; Tel: 86 931 496 8129; E-mail: lyang@licp.cas.cn and cgxia@licp.cas.cn

**CONTENTS**

|                                                                                                                                              |           |
|----------------------------------------------------------------------------------------------------------------------------------------------|-----------|
| <b>1. UV-vis spectra of [Hmim]OTs.....</b>                                                                                                   | <b>2</b>  |
| <b>2. Hetero-Michael addition of 1-phenylbut-2-en-1-one with nitrogen nucleophiles catalyzed by [Hmim]OTs.....</b>                           | <b>3</b>  |
| <b>3. Hetero-Michael addition of other <math>\alpha,\beta</math>-unsaturated electrophiles with nucleophiles catalyzed by [Hmim]OTs.....</b> | <b>4</b>  |
| <b>4. The crystal data of compounds 2ee and 2ef.....</b>                                                                                     | <b>5</b>  |
| <b>5. Characterization of the products in Table S1.....</b>                                                                                  | <b>6</b>  |
| <b>6. Characterization of the ionic liquids except [Hmim]OTs.....</b>                                                                        | <b>8</b>  |
| <b>7. Typical <sup>1</sup>H NMR and <sup>13</sup>C NMR spectra of the product.....</b>                                                       | <b>9</b>  |
| <b>8. <sup>1</sup>H NMR and <sup>13</sup>C NMR spectra of the ionic liquids.....</b>                                                         | <b>46</b> |

## 1. UV-vis spectra of [Hmim]OTs

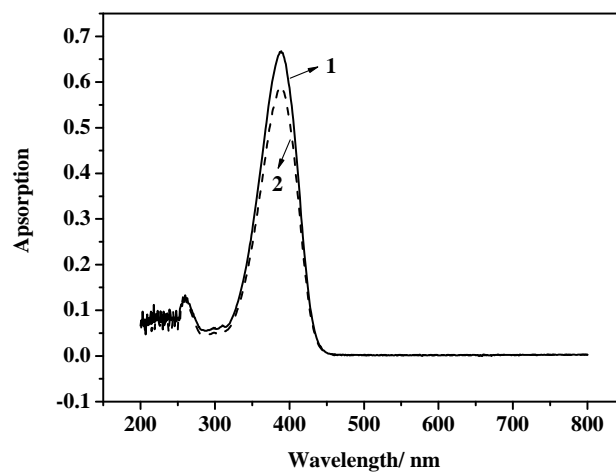

1: 4-nitroaniline; 2: 4-nitroaniline + [Hmim]OTs

**Fig. S1** UV-vis spectra of [Hmim]OTs in DMSO.

According to the equation  $H_o = pK(l)_{eq} + \log([I]_s/[I_{H^+}]_s)$ , calculated pKa of [Hmim]OTs was 1.91.

pKa HCl 1.8

pKa H<sub>2</sub>SO<sub>4</sub> 1.99

Ref.: *Acc. Chem. Res.* **1988**, *21*, 456, 463.

## 2. Hetero-Michael addition of 1-phenylbut-2-en-1-one with nitrogen nucleophiles catalyzed by [Hmim]OTs

**Table S1** Hetero-Michael addition of 1-phenylbut-2-en-1-one with nitrogen nucleophiles catalyzed by [Hmim]OTs<sup>a</sup>

| Entry          | Enone                                                                                         | Nucleophile                                                                                   | Product                                                                                         | Time (h) | Yield <sup>b</sup> (%) |
|----------------|-----------------------------------------------------------------------------------------------|-----------------------------------------------------------------------------------------------|-------------------------------------------------------------------------------------------------|----------|------------------------|
| 1              | 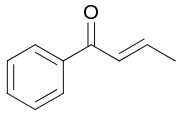 <b>1e</b>   |  <b>2a</b>   |  <b>2ea</b>   | 24       | 43                     |
| 2 <sup>c</sup> |  <b>1e</b>   |  <b>2b</b>   |  <b>2eb</b>   | 24       | 52                     |
| 3 <sup>c</sup> |  <b>1e</b>   |  <b>2c</b>   |  <b>2ec</b>   | 24       | 55                     |
| 4 <sup>c</sup> |  <b>1e</b>   |  <b>2d</b>   |  <b>2ed</b>   | 24       | 61                     |
| 5 <sup>c</sup> |  <b>1e</b> |  <b>2e</b> |  <b>2ee</b> | 24       | 75                     |
| 6 <sup>c</sup> |  <b>1e</b> |  <b>2f</b> |  <b>2ef</b> | 24       | 81                     |
| 7 <sup>c</sup> |  <b>1e</b> |  <b>2g</b> |  <b>2eg</b> | 24       | 65                     |
| 8 <sup>c</sup> |  <b>1e</b> |  <b>2h</b> |  <b>2eh</b> | 24       | 51                     |

<sup>a</sup> Reaction conditions: 1-phenylbut-2-en-1-one (0.5 mmol), carbamate or containing-nitrogen heterocycle (0.6 mmol), cat. [Hmim]OTs (30 mol%), rt. <sup>b</sup> Isolated yield. <sup>c</sup> 2 mL CH<sub>2</sub>Cl<sub>2</sub> was added.

### 3. Hetero-Michael addition of other $\alpha,\beta$ -unsaturated electrophiles with nucleophiles catalyzed by [Hmim]OTs

**Table S2** Hetero-Michael addition of other  $\alpha,\beta$ -unsaturated electrophiles with nucleophiles catalyzed by [Hmim]OTs<sup>a</sup>

| Entry | Nucleophile                                                                                   | $\alpha,\beta$ -unsaturated electrophiles                                                     | T (°C) | t (h) | Yield (%) |
|-------|-----------------------------------------------------------------------------------------------|-----------------------------------------------------------------------------------------------|--------|-------|-----------|
| 1     |                                                                                               | 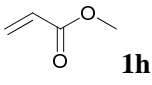 <b>1h</b>   | rt     | 24    | NR        |
| 2     |  <b>2a</b>   |  <b>1i</b>   | rt     | 24    | NR        |
| 3     |                                                                                               |  <b>1j</b>   | rt     | 24    | NR        |
| 4     |                                                                                               |  <b>1k</b>   | rt     | 24    | NR        |
| 5     |  <b>2e</b>  |  <b>1h</b>   | rt     | 24    | NR        |
| 6     |                                                                                               |  <b>1i</b>   | rt     | 24    | NR        |
| 7     |                                                                                               |  <b>1j</b>  | rt     | 24    | NR        |
| 8     |                                                                                               |  <b>1k</b> | rt     | 24    | NR        |
| 9     |  <b>3a</b> |  <b>1i</b> | rt     | 24    | trace     |
| 10    |                                                                                               |  <b>1k</b> | rt     | 24    | NR        |

<sup>a</sup> Reaction conditions:  $\alpha,\beta$ -unsaturated electrophile (0.5 mmol), nucleophile (0.6 mmol), cat. [Hmim]OTs (30 mol%).

#### 4. The crystal data of compounds **2ee** and **2ef**

The structure of **2ee** and **2ef** were unambiguously confirmed by the X-ray crystallographic analysis. The product of compound **2ee** (Table S1, entry 5):

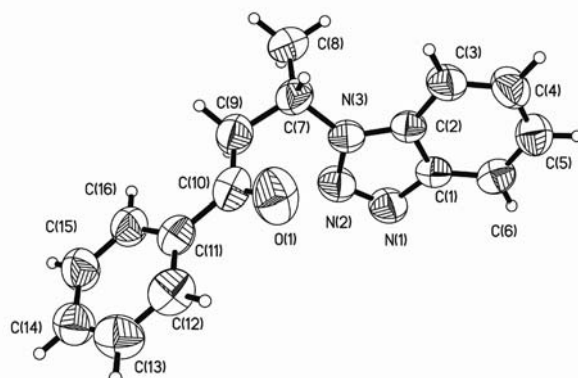

Bond precision 0.0031 Å, Cell:  $a = 9.912$ ,  $b = 13.636$ ,  $c = 10.633$ ,  $\alpha = 90$ ,  $\beta = 104.257$ ,  $\gamma = 90$ ,  $V = 1393.0$  Å<sup>3</sup>,  $Z = 4$ ,  $\rho_{\text{calcd}} = 1.265$  g cm<sup>-3</sup>,  $T = 296$  K, wavelength: 0.71073. Final R indices [ $I > 2\sigma(I)$ ],  $R1 = 0.0457$ ,  $wR2 = 0.1423$ ; Reflections collected / unique: 1725 / 2442;  $(h, k, l)_{\text{max}} = 11, 16, 12$ ;  $F_{(0,0,0)} = 560.0$ ,  $T_{\text{min}} = 0.976$ ,  $T_{\text{max}} = 0.980$ ; CCDC 836790.

These data can be obtained free of charge from the Cambridge Crystallographic Data Centre via [www.ccdc.cam.ac.uk/data\\_request/cif](http://www.ccdc.cam.ac.uk/data_request/cif).

The product of compound **2ef** (Table S1, entry 6):

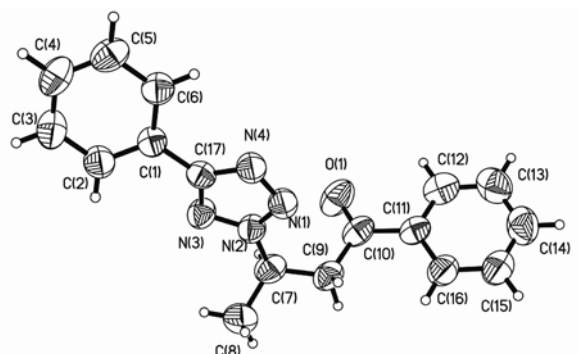

Bond precision 0.0044 Å, Cell:  $a = 6.203$  (2),  $b = 13.362$  (5),  $c = 18.973$  (7),  $\alpha = 90$ ,  $\beta = 106.802$  (10),  $\gamma = 90$ ,  $V = 1505.4$  (9) Å<sup>3</sup>,  $Z = 4$ ,  $\rho_{\text{calcd}} = 1.290$  g cm<sup>-3</sup>,  $T = 296$  K, wavelength: 0.71073. Final R indices [ $I > 2\sigma(I)$ ],  $R1 = 0.0590$ ,  $wR2 = 0.1850$ ; Reflections collected / unique: 1745 / 2599;  $(h, k, l)_{\text{max}} = 7, 15, 22$ ;  $F_{(0,0,0)} = 616.0$ ,  $T_{\text{min}} = 0.975$ ,  $T_{\text{max}} = 0.979$ ; CCDC 836789.

These data can be obtained free of charge from the Cambridge Crystallographic Data Centre via [www.ccdc.cam.ac.uk/data\\_request/cif](http://www.ccdc.cam.ac.uk/data_request/cif).

## 5. Characterization of the products in Table S1

### 3-(1-methyl-3-oxo-3-phenylpropyl) oxazolidin-2-one (**2ea**).

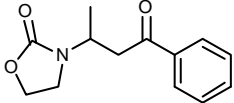 50.1 mg, 43% yield as white solid. mp: 75-76 °C. IR: 3352, 2980, 1687, 1532, 1255, 1065, 754, 692. <sup>1</sup>H NMR (400 MHz, CDCl<sub>3</sub>) δ = 1.33 (d, *J* = 6.8 Hz, 3H), 3.14 (dd, *J* = 6.8, 6.4 Hz, 1H), 3.45 (dd, *J* = 7.2, 7.2 Hz, 1H), 3.58-3.67 (m, 1H), 4.28 (t, *J* = 8.0 Hz, 2H), 4.32-4.39 (m, 1H), 7.46 (t, *J* = 7.6 Hz, 2H), 7.56 (t, *J* = 7.6 Hz, 1H), 7.95 (t, *J* = 7.6 Hz, 2H). <sup>13</sup>C NMR (100 MHz, CDCl<sub>3</sub>) δ = 17.7, 42.3, 42.5, 62.0, 128.1, 128.7, 133.4, 136.4, 157.5, 197.7. HRMS-ESI: Calcd. For C<sub>13</sub>H<sub>15</sub>NNaO<sub>3</sub>: 256.0944. Found: 256.0936.

### 3-(imidazol-1-yl)-1-phenylbutan-1-one (**2eb**).

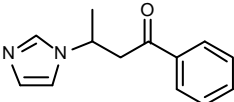 55.6 mg, 52% yield as white solid. mp: 68-69 °C. IR: 3353, 3215, 3111, 3062, 2979, 2935, 1684, 1598, 1480, 1451, 1409, 1367, 1286, 1220, 1081, 991, 911, 819, 758, 693, 666, 639. <sup>1</sup>H NMR (400 MHz, CDCl<sub>3</sub>) δ = 3.20 (d, *J* = 6.8 Hz, 3H), 3.33 (dd, *J* = 6.8, 6.4 Hz, 1H), 3.48 (dd, *J* = 6.4, 6.4 Hz, 1H), 4.96-5.00 (m, 1H), 7.02 (d, *J* = 8.8 Hz, 2H), 7.45-7.47 (m, 2H), 7.55-7.57 (m, 1H), 7.61 (s, 1H), 7.88 (d, *J* = 7.2 Hz, 2H). <sup>13</sup>C NMR (100 MHz, CDCl<sub>3</sub>) δ = 21.7, 46.2, 48.9, 116.6, 127.8, 128.6, 129.2, 133.5, 135.8, 136.1, 196.1. HRMS-ESI: Calcd. For C<sub>13</sub>H<sub>15</sub>N<sub>2</sub>O: 215.1179. Found: 215.1180.

### 1-phenyl-3-(1*H*-pyrazol-1-yl) butan-1-one (**2ec**).

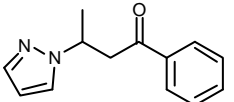 58.9 mg, 55% yield as white solid. mp: 47 °C. IR: 2981, 1685, 1446, 1398, 1287, 1214, 754, 691. <sup>1</sup>H NMR (400 MHz, CDCl<sub>3</sub>) δ = 1.61 (d, *J* = 6.8 Hz, 1H), 3.32 (dd, *J* = 6.0, 6.4 Hz, 1H), 3.78 (dd, *J* = 6.8, 6.4 Hz, 1H), 5.01-5.10 (m, 1H), 6.17 (t, *J* = 2.0 Hz, 1H), 7.42 (t, *J* = 7.6 Hz, 2H), 7.48-7.50 (m, 2H), 7.53 (t, *J* = 7.6 Hz, 1H), 7.91 (d, *J* = 7.2 Hz, 1H). <sup>13</sup>C NMR (100 MHz, CDCl<sub>3</sub>) δ = 21.3, 45.2, 53.4, 104.6, 128.0, 128.5, 133.3, 136.5, 139.3, 197.3. HRMS-ESI: Calcd. For C<sub>13</sub>H<sub>14</sub>N<sub>2</sub>NaO: 237.0998. Found: 237.1007.

### 3-(1*H*-Benzo[d]imidazol-1-yl)-1-phenylbutan-1-one (**2ed**).

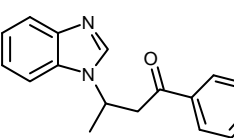 80.5 mg, 61% yield as white solid. mp: 94-95 °C. IR: 2980, 2936, 1685, 1491, 1455, 1363, 1287, 1208, 996, 893, 751, 692. <sup>1</sup>H NMR (400 MHz, CDCl<sub>3</sub>) δ = 1.76 (d, *J* = 6.8 Hz, 3H), 3.52 (dd, *J* = 7.6, 7.6 Hz, 1H), 3.67 (dd, *J* = 5.6, 5.6 Hz, 1H), 5.24-5.32 (m, 1H), 7.28-7.32 (m, 2H), 7.45 (t, *J* = 7.2 Hz, 2H), 7.51-7.58 (m, 2H), 7.81 (dd, *J* = 1.6, 2.4 Hz, 1H), 7.90 (d, *J* = 6.8 Hz, 2H), 8.07 (s, 1H). <sup>13</sup>C NMR (100 MHz, CDCl<sub>3</sub>) δ = 20.7, 44.8, 47.9, 110.2, 120.6, 122.2, 122.9, 127.9, 128.8, 133.7, 136.2, 141.2, 144.0, 196.3. HRMS-ESI: Calcd. For C<sub>17</sub>H<sub>17</sub>N<sub>2</sub>O: 265.1335. Found: 265.1340.

### 3-(1*H*-benzo[d][1,2,3]triazol-1-yl)-1-phenylbutan-1-one (**2ee**).

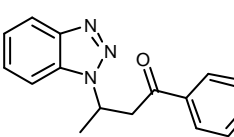 88.9 mg, 75% yield as white solid. mp: 96-97 °C. IR: 3449, 2985, 1683, 1640, 1271, 750, 690. <sup>1</sup>H NMR (400 MHz, CDCl<sub>3</sub>) δ = 1.79 (d, *J* = 6.8 Hz, 3H), 3.66 (dd, *J* = 6.0, 6.0 Hz, 1H), 4.11 (dd, *J* = 6.8, 7.2 Hz, 1H), 5.58-5.66 (m, 1H), 7.34-7.36 (m, 1H), 7.38-7.42 (m, 2H), 7.44-7.58 (m,

2H), 7.71 (d,  $J = 8.4$  Hz, 1H), 7.93 (d,  $J = 8.8$  Hz, 1H), 8.04 (d,  $J = 8.4$  Hz, 1H).  $^{13}\text{C}$  NMR (100 MHz,  $\text{CDCl}_3$ )  $\delta = 21.4, 44.7, 50.5, 109.7, 119.8, 123.9, 127.2, 128.0, 128.7, 132.6, 133.6, 136.2, 145.8, 196.6$ . HRMS-ESI: Calcd. For  $\text{C}_{16}\text{H}_{15}\text{N}_3\text{NaO}$ : 288.1107. Found: 288.1103.

1-phenyl-3-(5-phenyl-1*H*-tetrazol-1-yl) butan-1-one (**2ef**).

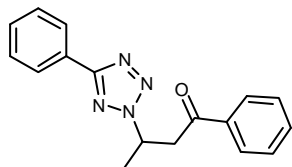

118.2 mg, 81% yield as white solid. mp: 91-92 °C. IR: 3063, 2986, 1687, 1448, 1220, 999, 757, 691.  $^1\text{H}$  NMR (400 MHz,  $\text{CDCl}_3$ )  $\delta = 1.77$  (d,  $J = 6.8$  Hz, 3H), 3.59 (dd,  $J = 6.8, 7.2$  Hz, 1H), 3.98 (dd,  $J = 6.4, 6.4$  Hz, 1H), 5.66-5.74 (m, 1H), 7.44-7.48 (m, 5H), 7.56-7.59 (m, 1H), 7.96 (d,  $J = 7.6$  Hz, 2H), 8.13 (d,  $J = 8.0$  Hz, 2H).  $^{13}\text{C}$  NMR (100 MHz,  $\text{CDCl}_3$ )  $\delta = 20.0, 43.0, 55.3, 125.8, 126.5, 127.1, 127.7, 127.8, 129.2, 132.7, 135.1, 163.8, 194.6$ . HRMS-ESI: Calcd. For  $\text{C}_{17}\text{H}_{16}\text{N}_4\text{NaO}$ : 315.1216. Found: 315.1201.

1-phenyl-3-(4*H*-1,2,4-triazol-4-yl)butan-1-one (**2eg**).

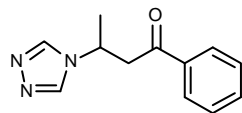

69.9 mg, 65% yield as white solid. mp: 75-76 °C. IR: 3425, 3110, 2981, 2938, 1710, 1684, 1217, 759, 692, 667.  $^1\text{H}$  NMR (400 MHz,  $\text{CDCl}_3$ )  $\delta = 1.66$  (d,  $J = 6.8$  Hz, 2H), 3.33 (dd,  $J = 5.2, 5.2$  Hz, 1H), 3.81 (dd,  $J = 7.6, 7.6$  Hz, 1H), 5.16-5.24 (m, 1H), 7.46 (t,  $J = 7.6$  Hz, 2H), 7.58 (t,  $J = 7.6$  Hz, 1H), 7.90-7.92 (m, 3H), 8.21 (s, 1H).  $^{13}\text{C}$  NMR (100 MHz,  $\text{CDCl}_3$ )  $\delta = 21.0, 44.5, 51.6, 128.0, 128.7, 133.7, 136.2, 142.9, 151.9, 196.5$ . HRMS-ESI: Calcd. For  $\text{C}_{12}\text{H}_{13}\text{N}_3\text{O}$ : 216.1179. Found: 216.1175.

## 6. Characterization of the ionic liquids except [Hmim]OTs

### [Bmim]BF<sub>4</sub>

IR: 3639, 3563, 3162, 3122, 2965, 2939, 2875, 1627, 1572, 1466, 1384, 1286, 1171, 1061, 849, 758, 698, 652, 624, 522. <sup>1</sup>H NMR (400 MHz, D<sub>2</sub>O)  $\delta$  = 0.84 (t, *J* = 7.6 Hz, 3H), 1.19-1.28 (m, 2H), 1.73-1.80 (m, 2H), 3.81 (s, 1H), 4.11 (t, *J* = 7.2 Hz, 2H), 7.34 (s, 1H), 7.39 (s, 1H), 8.61 (s, 1H). <sup>13</sup>C NMR (100 MHz, D<sub>2</sub>O)  $\delta$  = 12.6, 18.7, 31.2, 35.5, 49.2, 122.2, 123.4, 135.8. MS (ESI): [m/z]<sup>+</sup> = 138.7, [m/z]<sup>-</sup> = 86.6.

### [Bmim]PF<sub>6</sub>

IR: 3674, 3171, 3125, 2967, 2940, 2877, 1572, 1466, 1432, 1387, 1339, 1170, 1113, 1028, 823, 748, 699, 652, 624, 559, 409. <sup>1</sup>H NMR (400 MHz, (CD<sub>3</sub>)<sub>2</sub>SO)  $\delta$  = 0.91 (t, *J* = 7.2 Hz, 3H), 1.22-1.32 (m, 2H), 1.74-1.81 (m, 2H), 3.85 (s, 3H), 4.16 (t, *J* = 7.2 Hz, 2H), 7.67 (t, *J* = 1.6 Hz, 1H), 7.73-7.74 (m, 1H), 9.08 (s, 1H). <sup>13</sup>C NMR (100 MHz, (CD<sub>3</sub>)<sub>2</sub>SO)  $\delta$  = 13.1, 18.7, 31.3, 35.6, 48.5, 122.2, 123.5, 136.4. MS (ESI): [m/z]<sup>+</sup> = 138.7, [m/z]<sup>-</sup> = 144.6.

### [Bmim]HSO<sub>4</sub>

IR: 3151, 3108, 2963, 2874, 1645, 1570, 1464, 1170, 1047, 857, 756, 697, 621, 581, 438. <sup>1</sup>H NMR (400 MHz, D<sub>2</sub>O)  $\delta$  = 3.25 (t, *J* = 7.2 Hz, 3H), 3.60-3.70 (m, 2H), 4.15-4.22 (m, 2H), 6.23 (s, 3H), 6.53 (t, *J* = 6.8 Hz, 2H), 7.28 (s, 1H), 9.76-9.77 (m, 1H), 9.81-9.82 (m, 1H), 11.0 (s, 1H). <sup>13</sup>C NMR (100 MHz, D<sub>2</sub>O)  $\delta$  = 15.1, 21.2, 33.7, 38.1, 51.7, 124.7, 126.0, 138.3. MS (ESI): [m/z]<sup>+</sup> = 138.7, [m/z]<sup>-</sup> = 96.5.

### [Bsmim]HSO<sub>4</sub>

IR: 3158, 3117, 2962, 1707, 1572, 1462, 1424, 1223, 1169, 1030, 836, 747, 651, 583, 561, 524. <sup>1</sup>H NMR (400 MHz, D<sub>2</sub>O)  $\delta$  = 1.33-1.41 (m, 2H), 1.61-1.69 (m, 2H), 2.55-2.59 (m, 2H), 3.52 (s, 3H), 3.86-3.89 (m, 2H), 7.07-7.08 (m, 1H), 7.12-7.13 (m, 1H), 8.35 (s, 1H). <sup>13</sup>C NMR (100 MHz, D<sub>2</sub>O)  $\delta$  = 20.7, 27.9, 35.5, 48.7, 49.9, 121.1, 123.5, 135.7. MS (ESI): [m/z]<sup>+</sup> = 218.7, [m/z]<sup>-</sup> = 96.5.

### PyHSO<sub>4</sub>

IR: 3432, 2083, 1635, 1544, 1489, 1200, 1122, 1053, 750, 677, 617, 431. <sup>1</sup>H NMR (400 MHz, D<sub>2</sub>O)  $\delta$  = 7.80-7.84 (m, 2H), 8.34-8.39 (m, 1H), 8.53 (d, *J* = 5.2 Hz, 2H). <sup>13</sup>C NMR (100 MHz, D<sub>2</sub>O)  $\delta$  = 127.3, 141.0, 147.1. MS (ESI): [m/z]<sup>+</sup> = 79.7, [m/z]<sup>-</sup> = 96.6.

### [Hmim]HSO<sub>4</sub>

IR: 3148, 1642, 1587, 1552, 1453, 1377, 1280, 1192, 1086, 1049, 845, 761, 664, 624, 595, 439. <sup>1</sup>H NMR (400 MHz, D<sub>2</sub>O)  $\delta$  = 3.54 (s, 3H), 7.05 (d, *J* = 1.6 Hz, 2H), 8.27 (s, 1H). <sup>13</sup>C NMR (100 MHz, D<sub>2</sub>O)  $\delta$  = 35.3, 119.2, 122.7, 134.7. MS (ESI): [m/z]<sup>+</sup> = 82.8, [m/z]<sup>-</sup> = 96.5.

### [Hmim]BF<sub>4</sub>

IR: 3610, 3332, 3169, 3033, 2980, 2887, 2765, 2647, 1632, 1589, 1553, 1449, 1382, 1332, 1309, 1285, 1059, 915, 852, 762, 666, 625, 580, 524. <sup>1</sup>H NMR (400 MHz, D<sub>2</sub>O)  $\delta$  = 3.23 (d, *J* = 2.0 Hz, 3H), 7.33 (s, 2H), 8.54 (s, 1H). <sup>13</sup>C NMR (100 MHz, D<sub>2</sub>O)  $\delta$  = 35.4, 119.4, 122.9, 135.0. MS (ESI): [m/z]<sup>+</sup> = 82.8, [m/z]<sup>-</sup> = 86.6.



## 7. Typical $^1\text{H}$ NMR and $^{13}\text{C}$ NMR spectra of the products

1-phenyl-3-(5-phenyl-2*H*-tetrazol-2-yl) butan-1-one

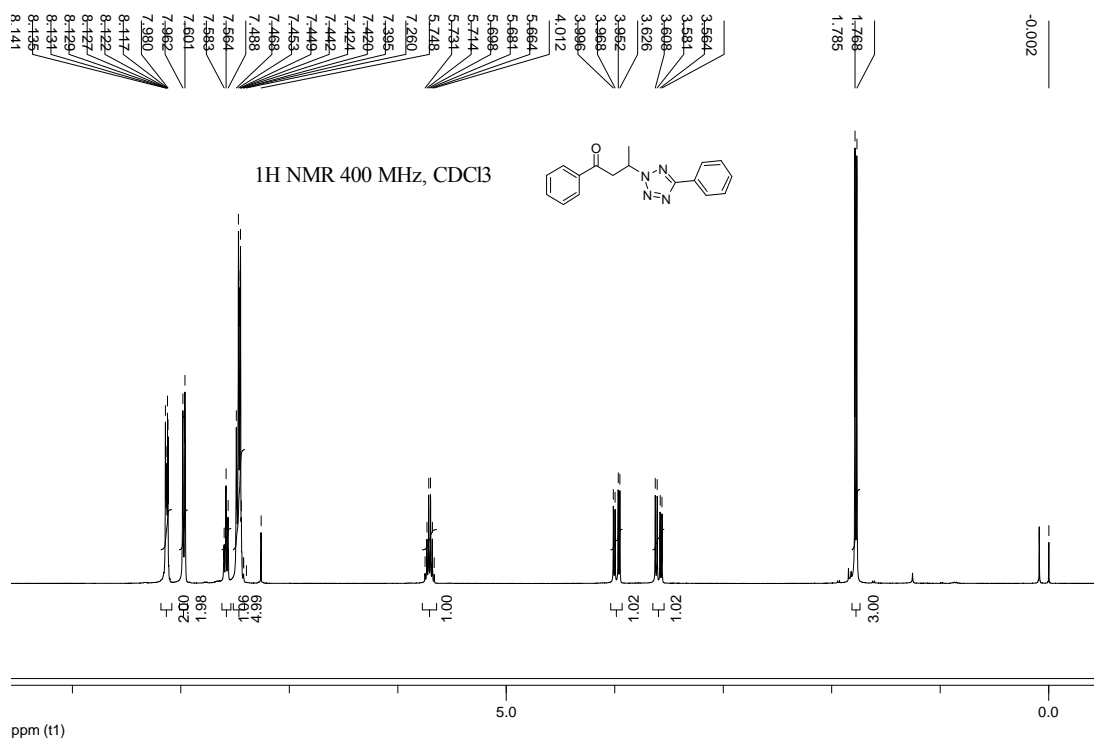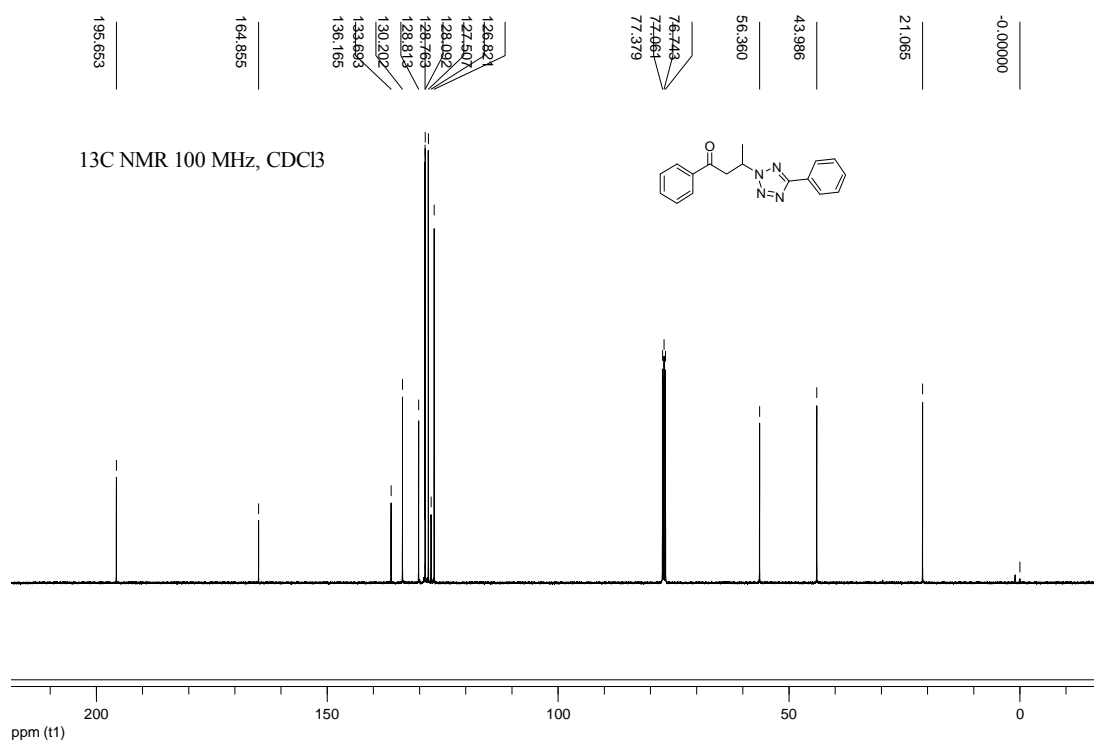

### 3-(1-Methyl-3-oxo-3-phenylpropyl) oxazolidin-2-one

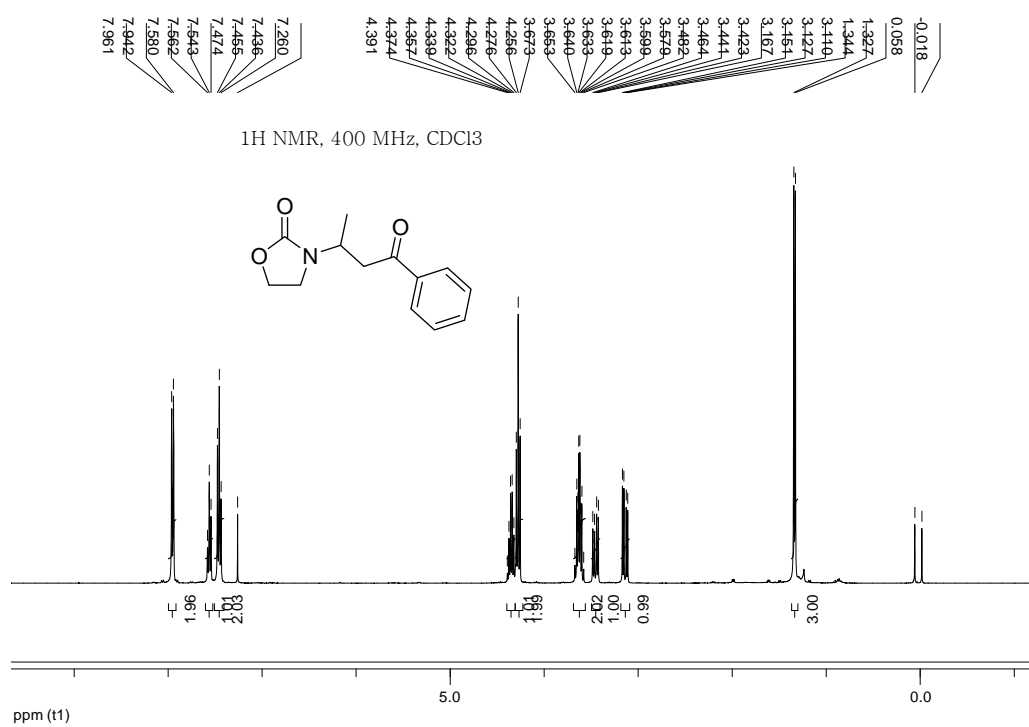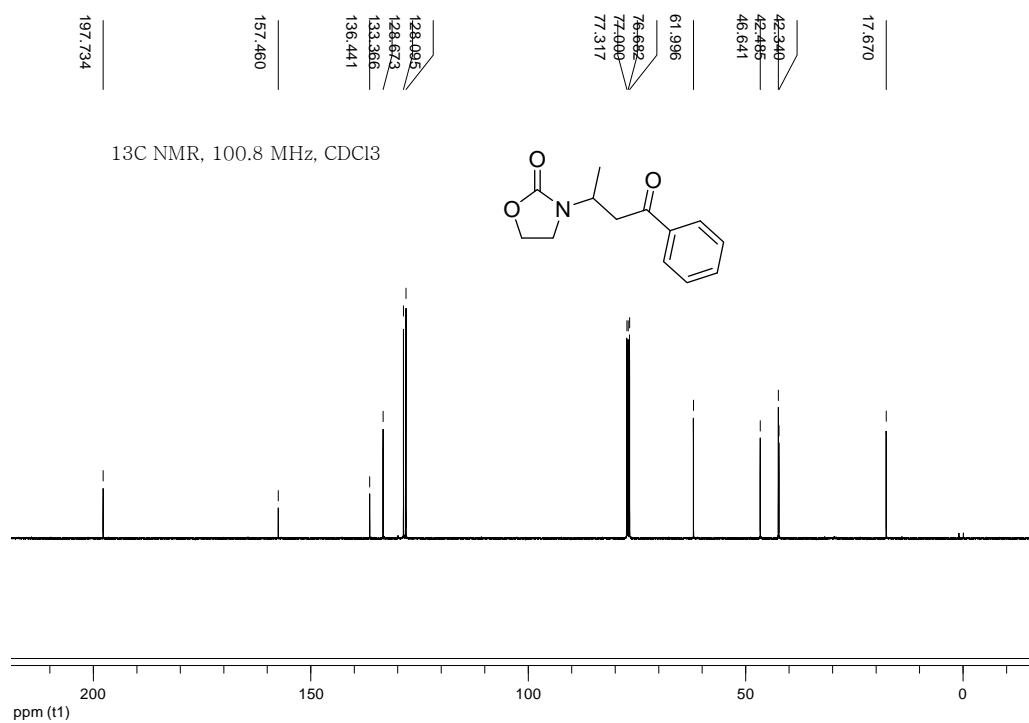

3-(1*H*-benzo[d][1,2,3]triazol-1-yl)-1-phenylbutan-1-one

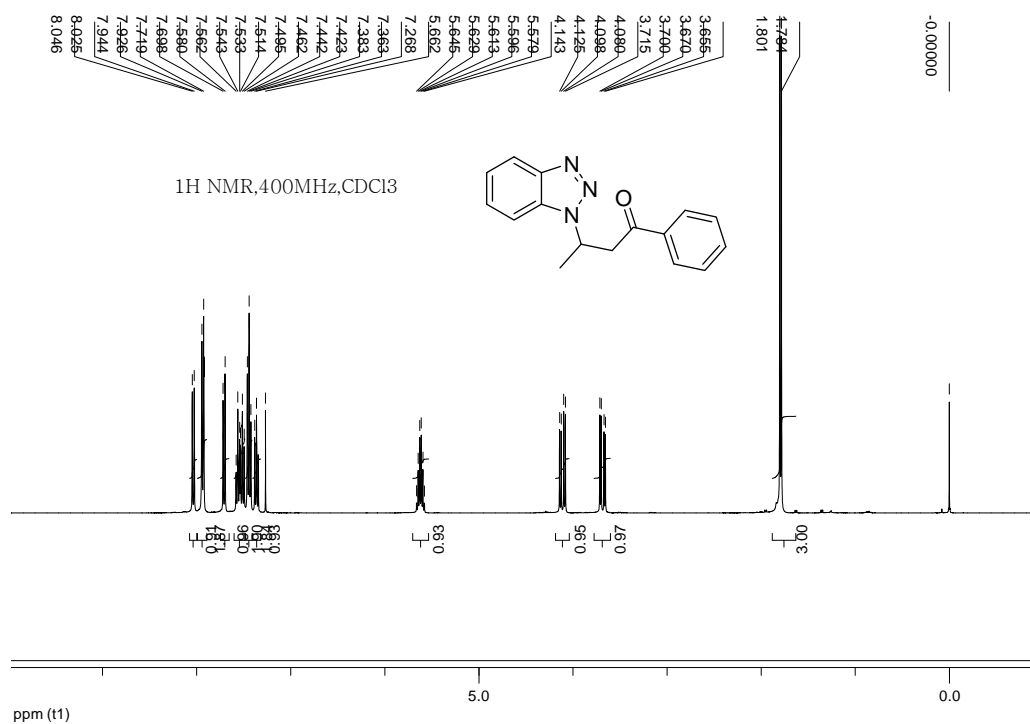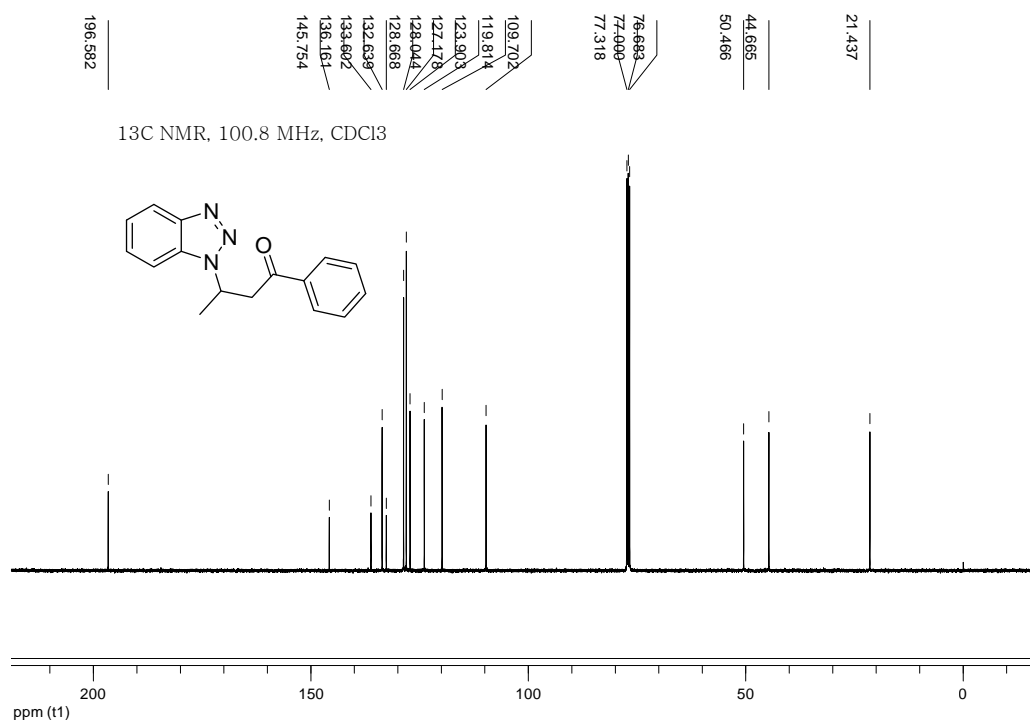

1-(2-Nitro-1-phenylethyl)-1H-benzo[1,2,3]triazole

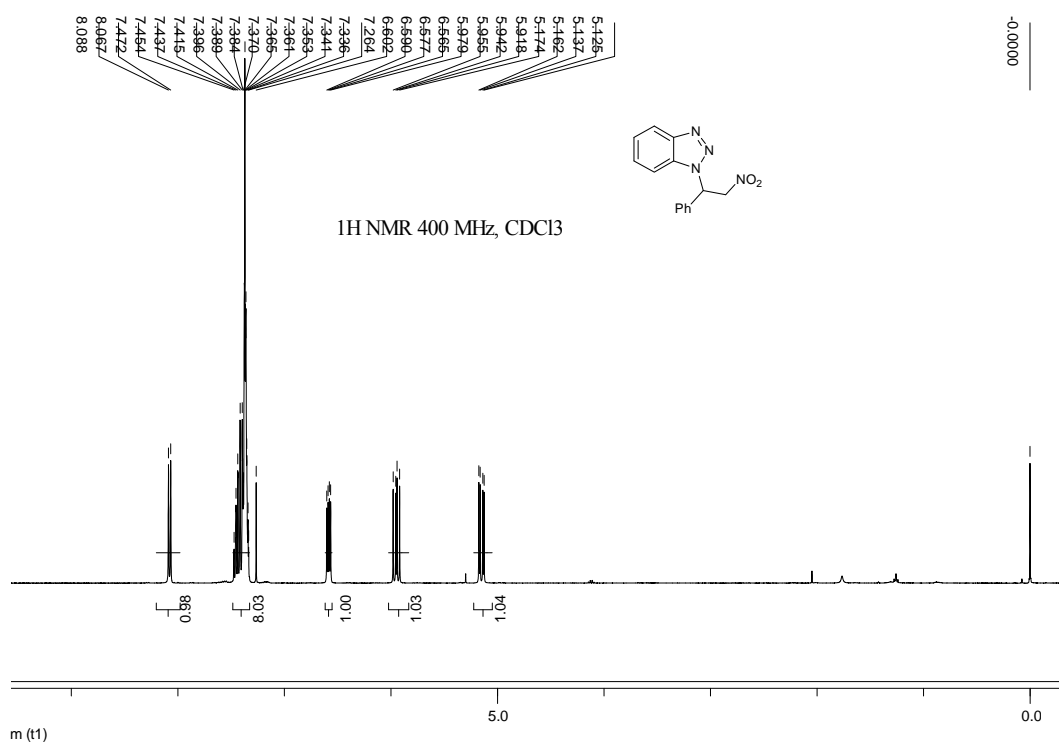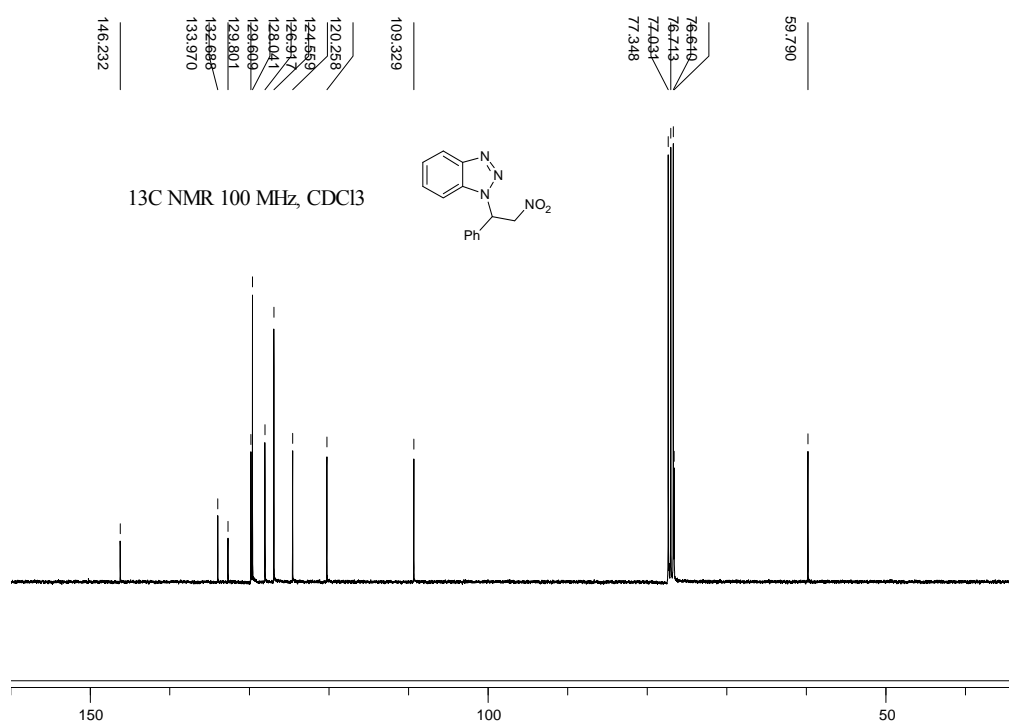

### 1-Phenyl-3-(1*H*-pyrazol-1-yl) butan-1-one

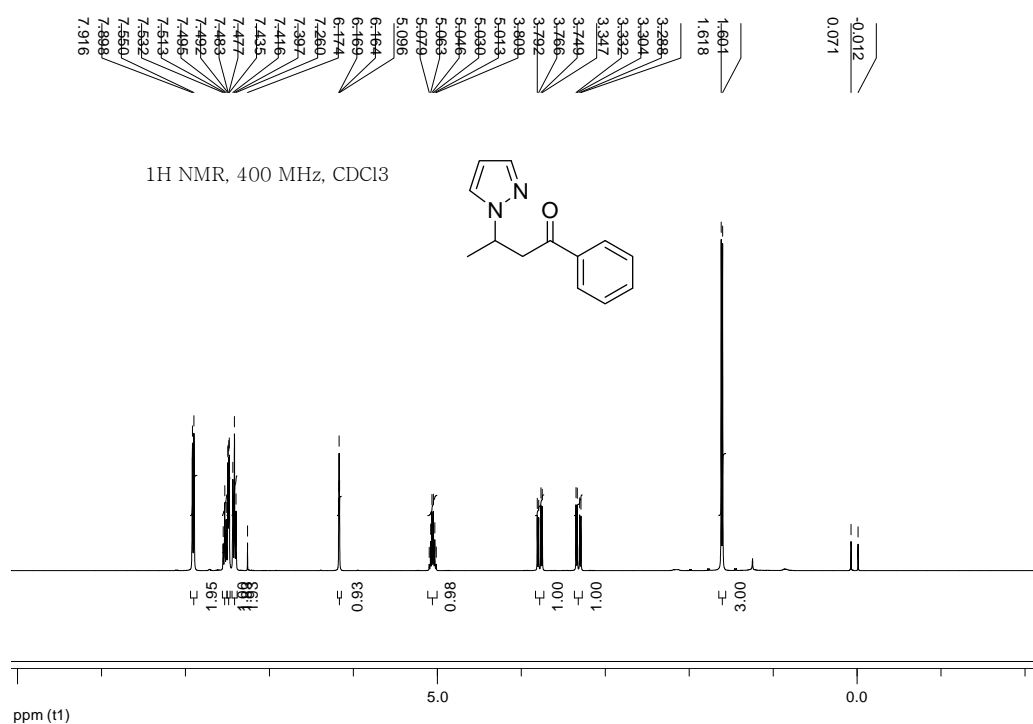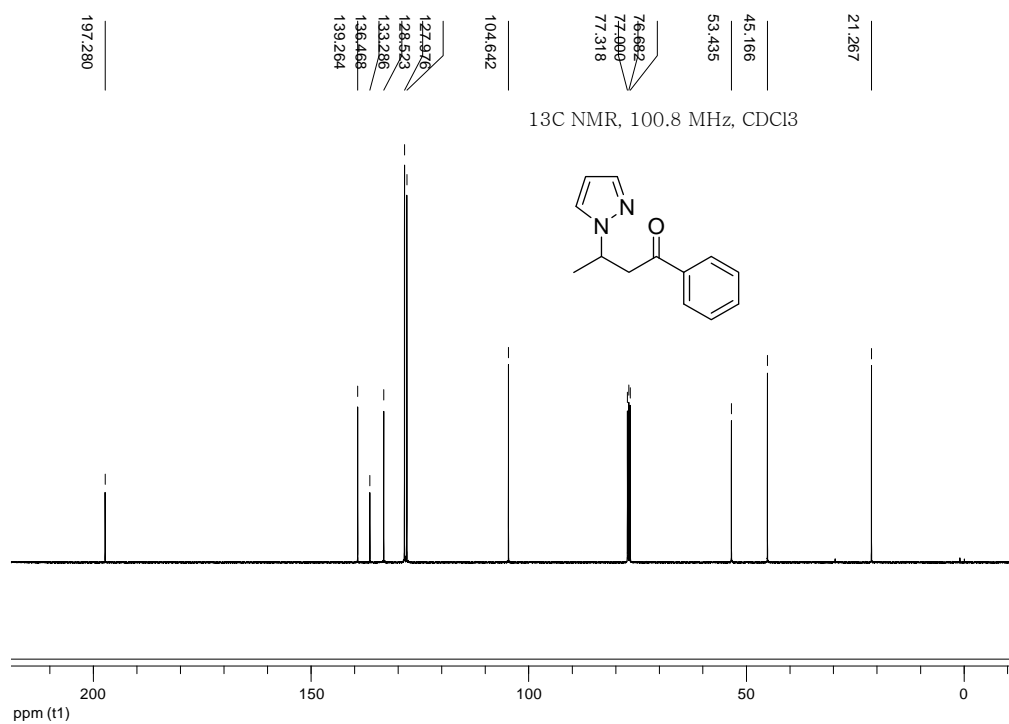

3-Benzylthio-cyclohexan-1-one

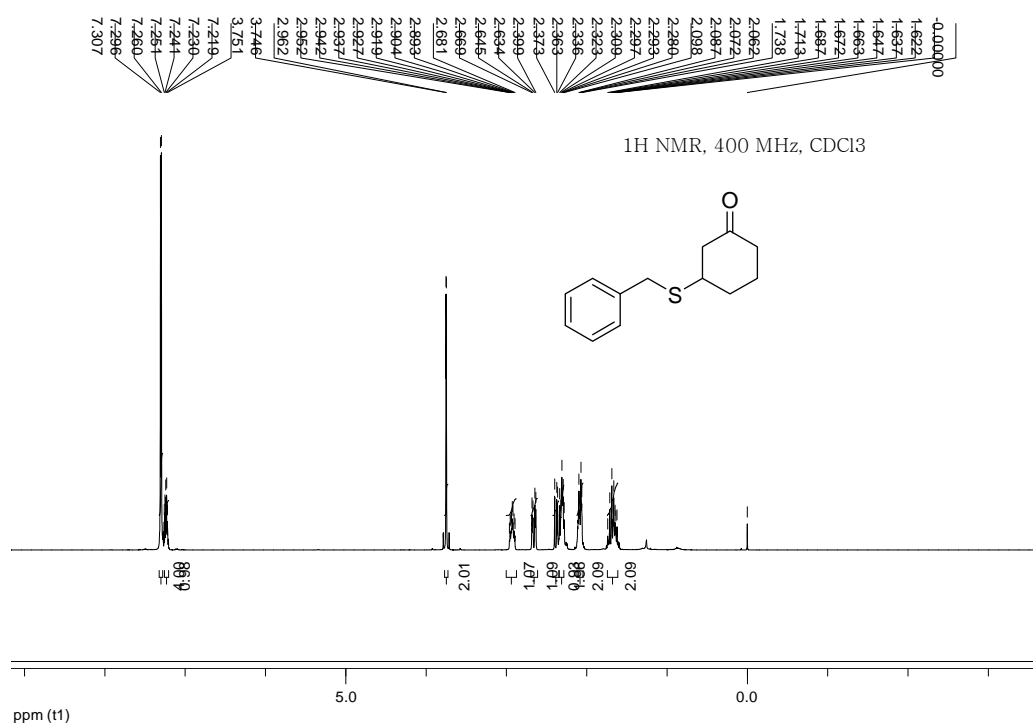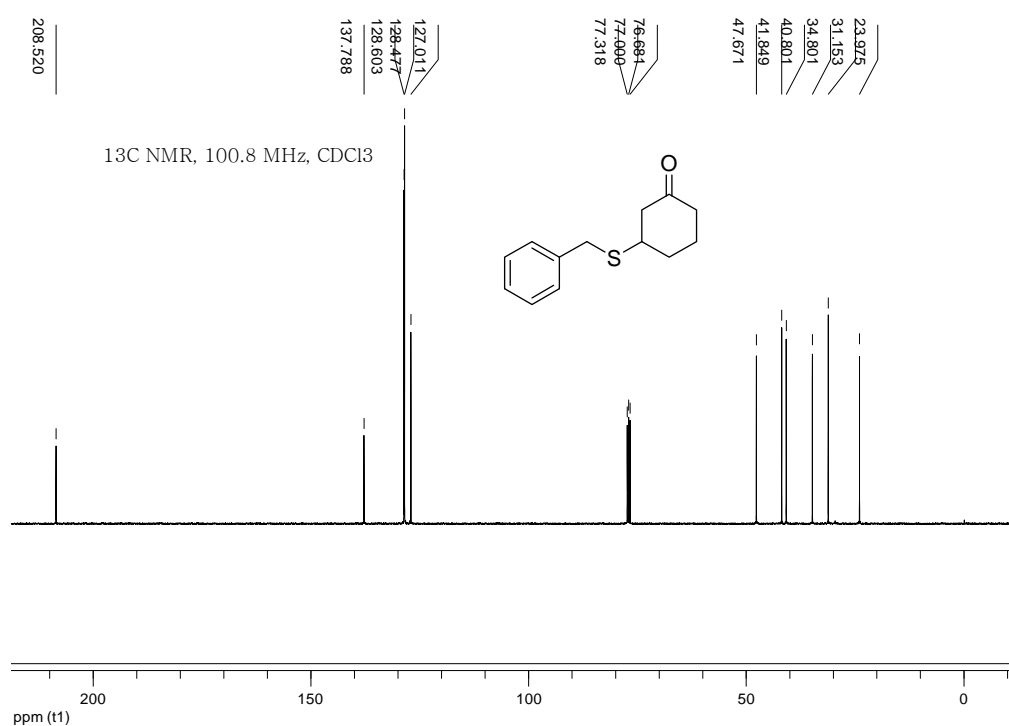

### 3-Phenylthiol-cyclohexan-1-one

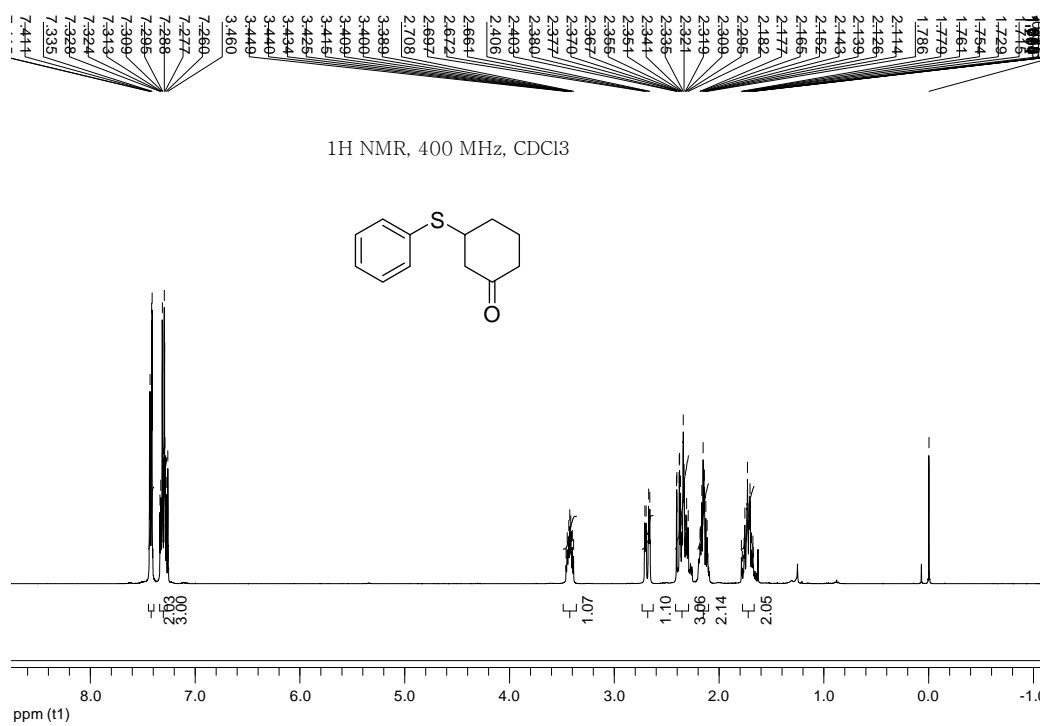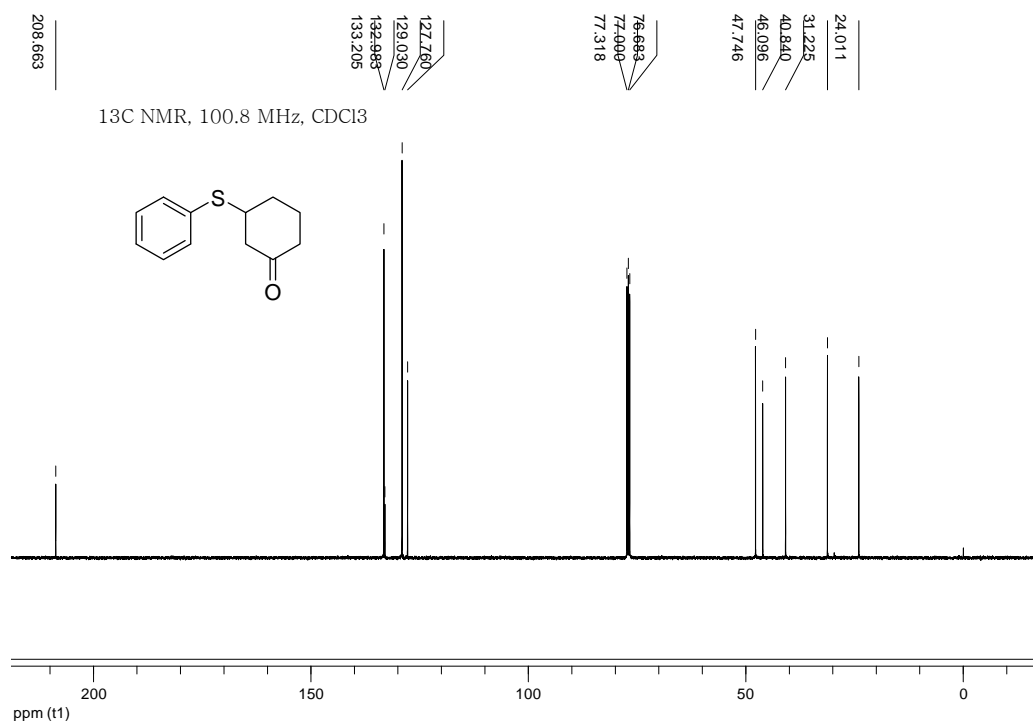





3-(4-Methoxyphenylthio)cyclohexanone

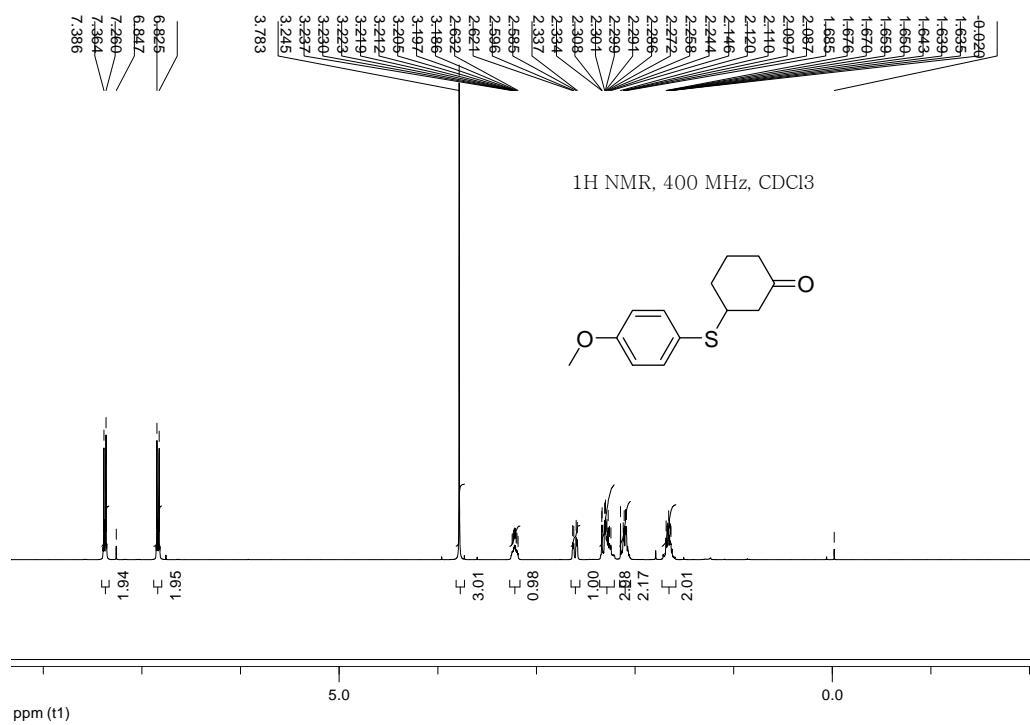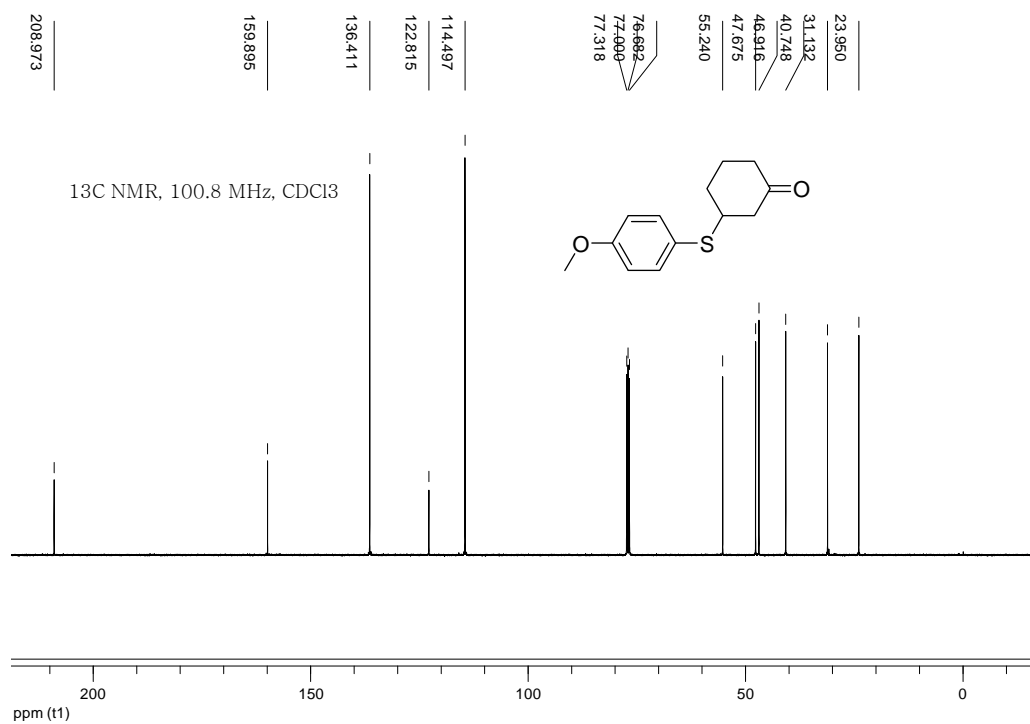

### Methyl 3-(phenylthio)propanoate

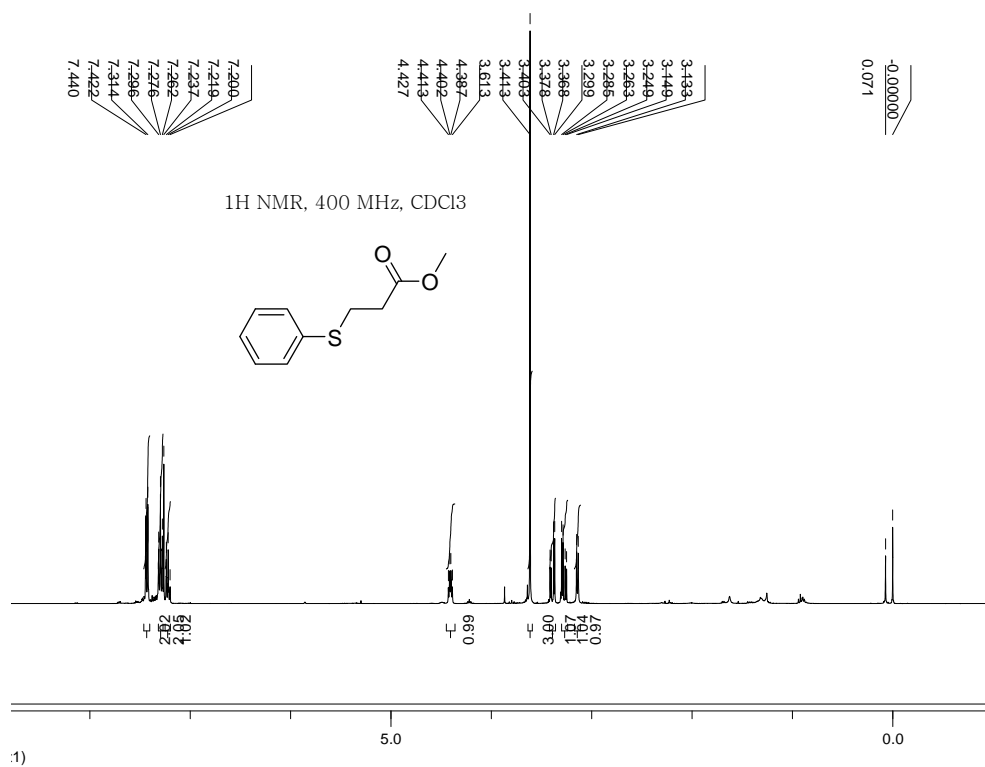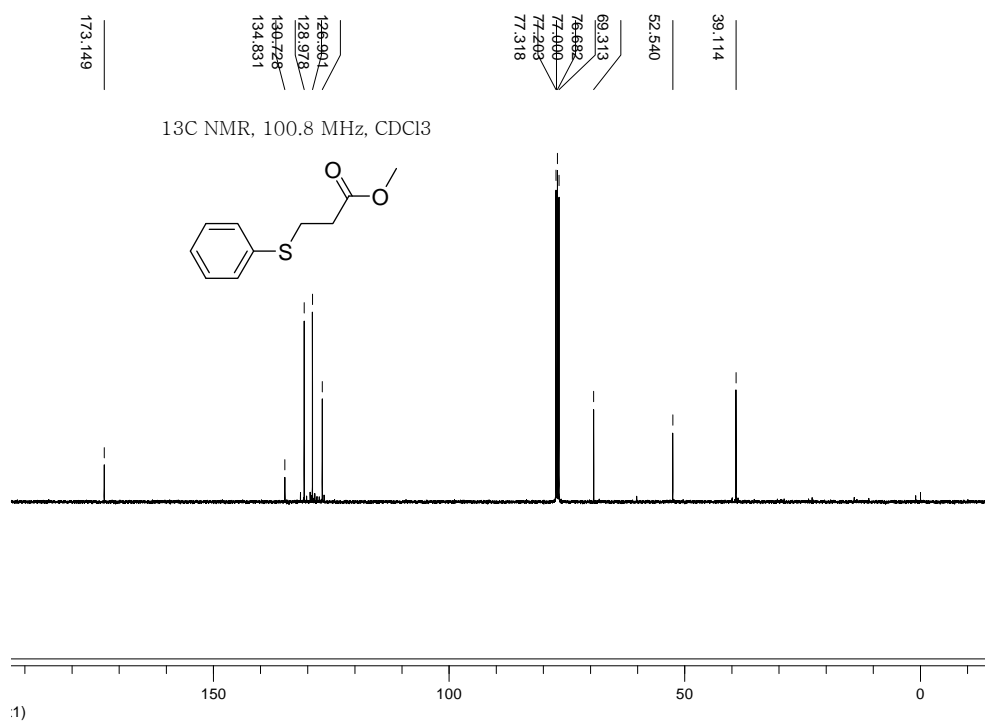

(Phenylthio)acetonitrile

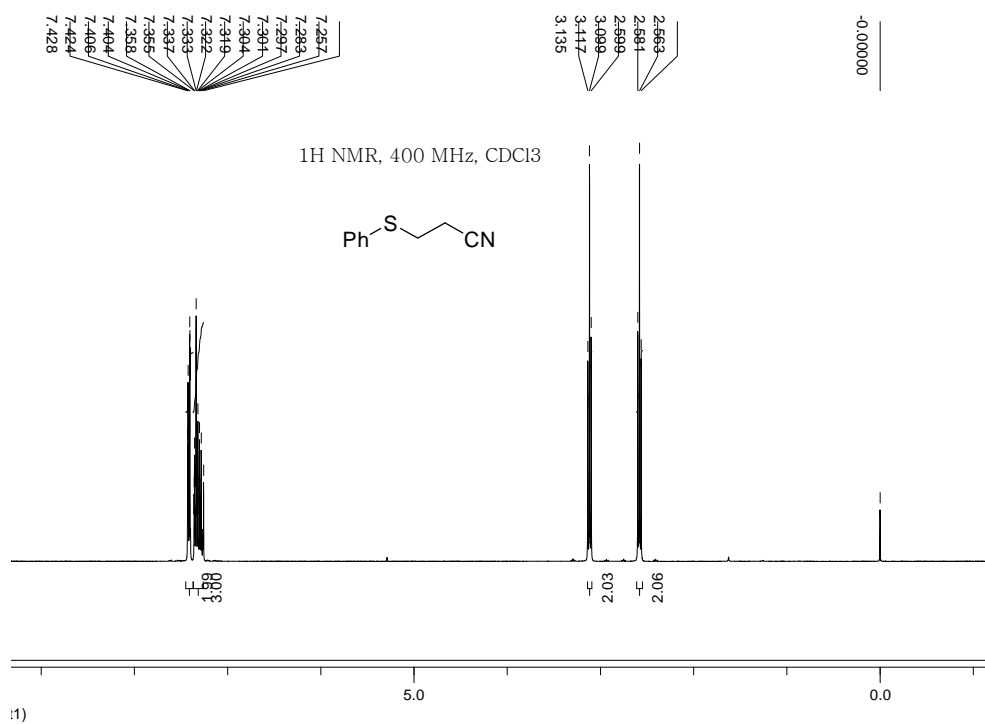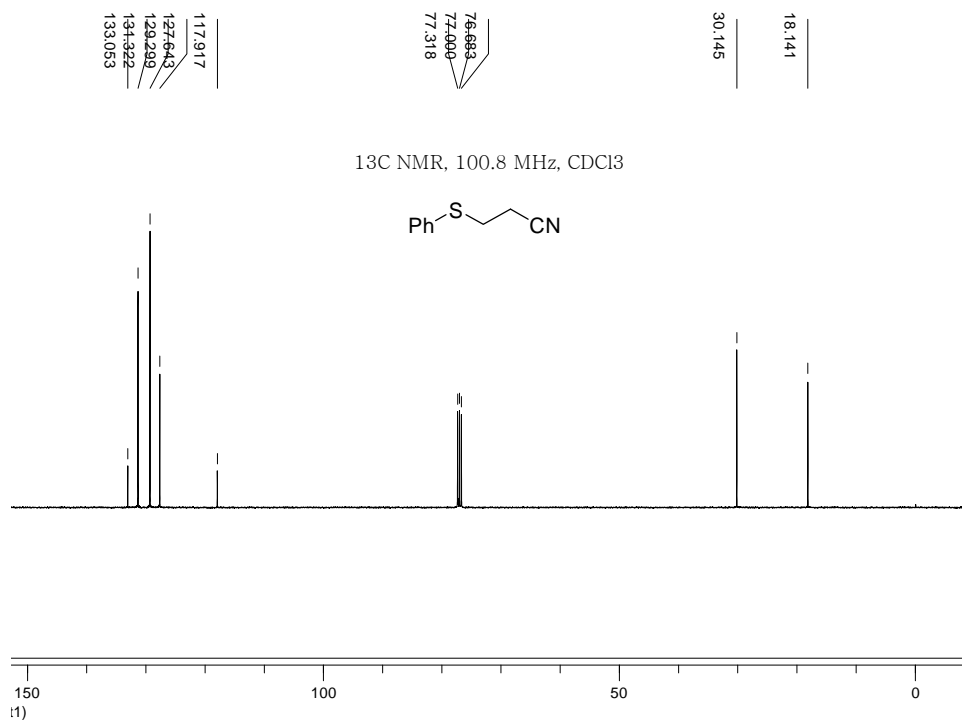

### 3-Methoxy-1-phenylbutan-1-one

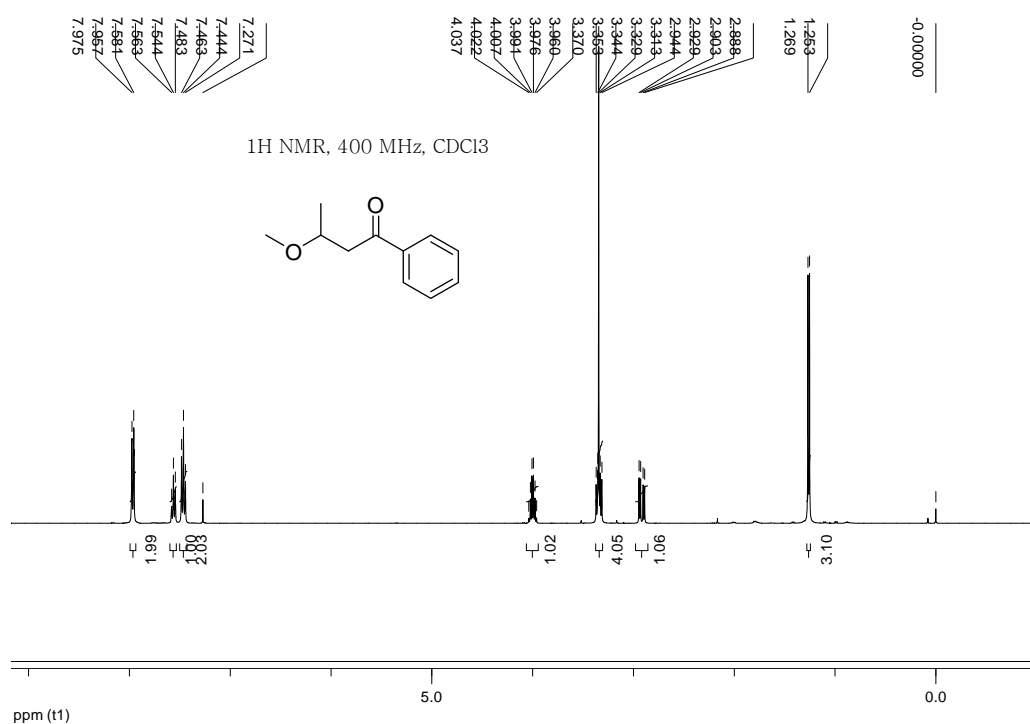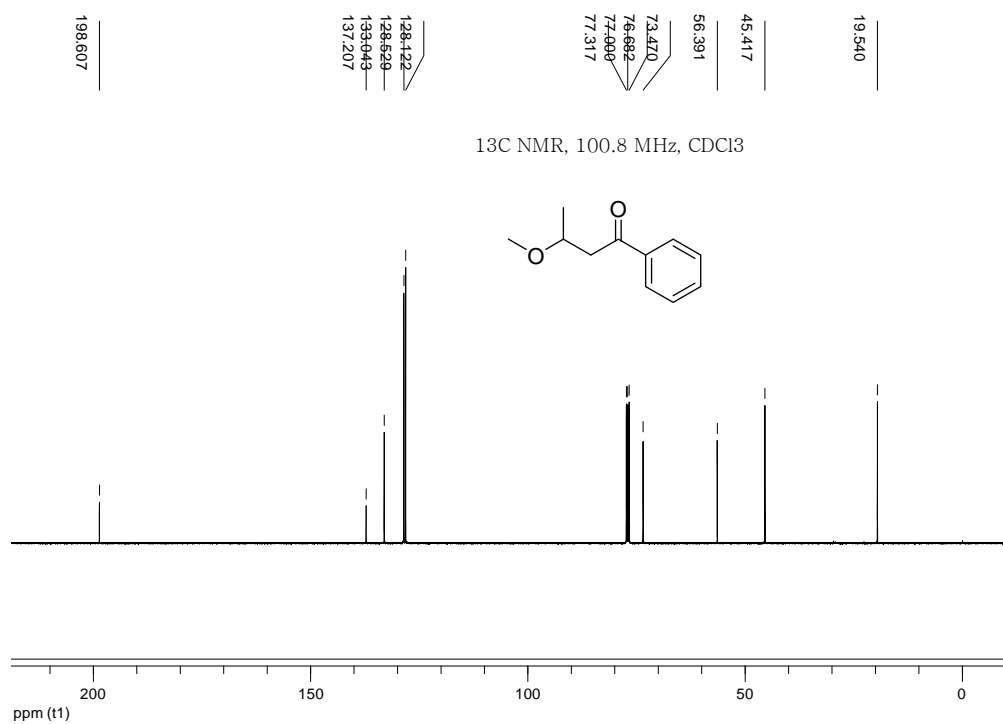

Ethyl 4-oxohexan-2-yl carbamate

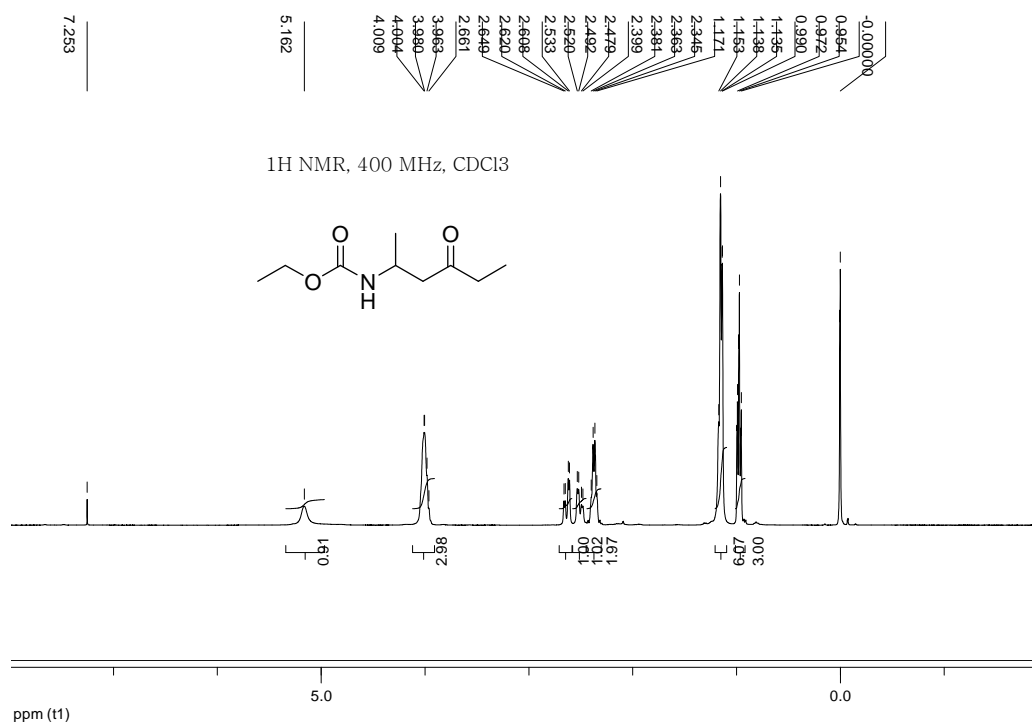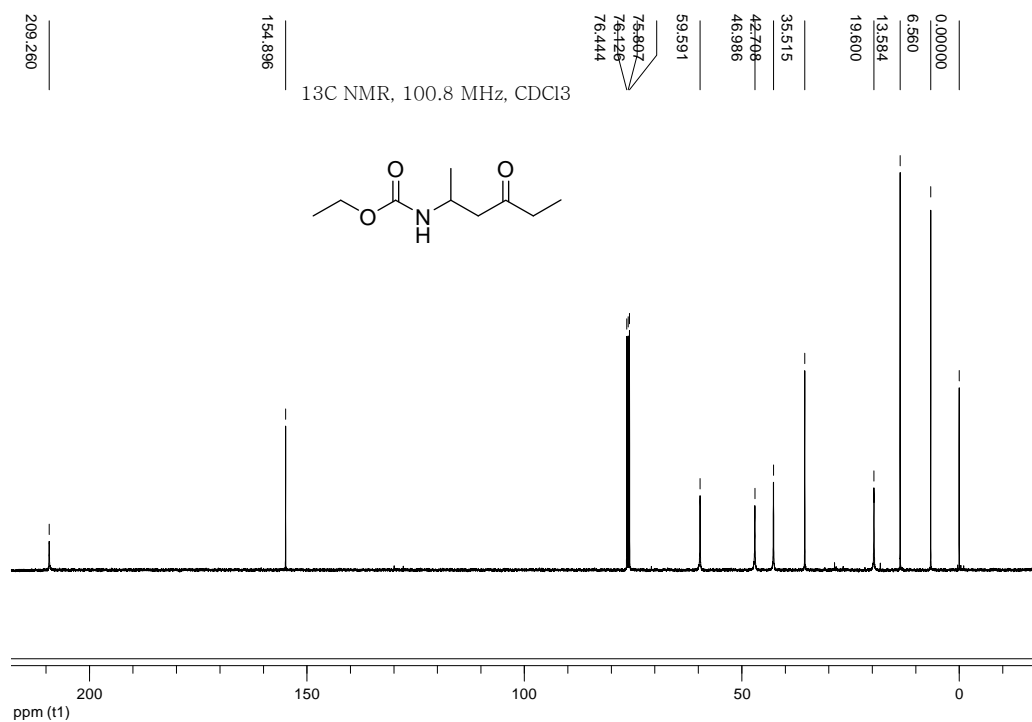

### Ethyl 4-oxopentan-2-ylcarbamate

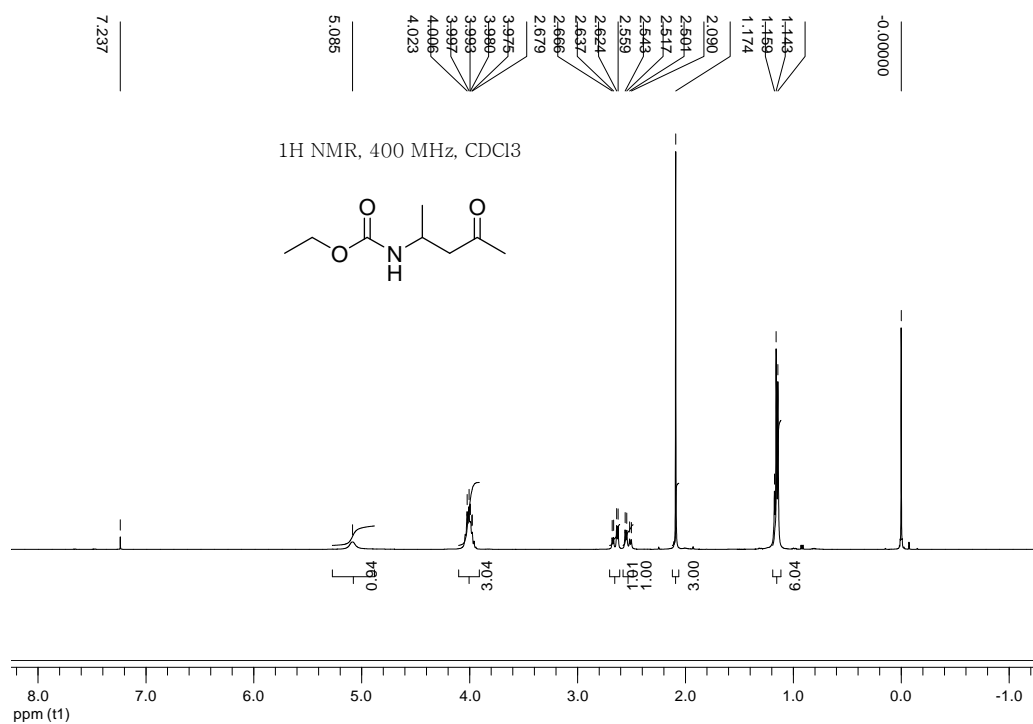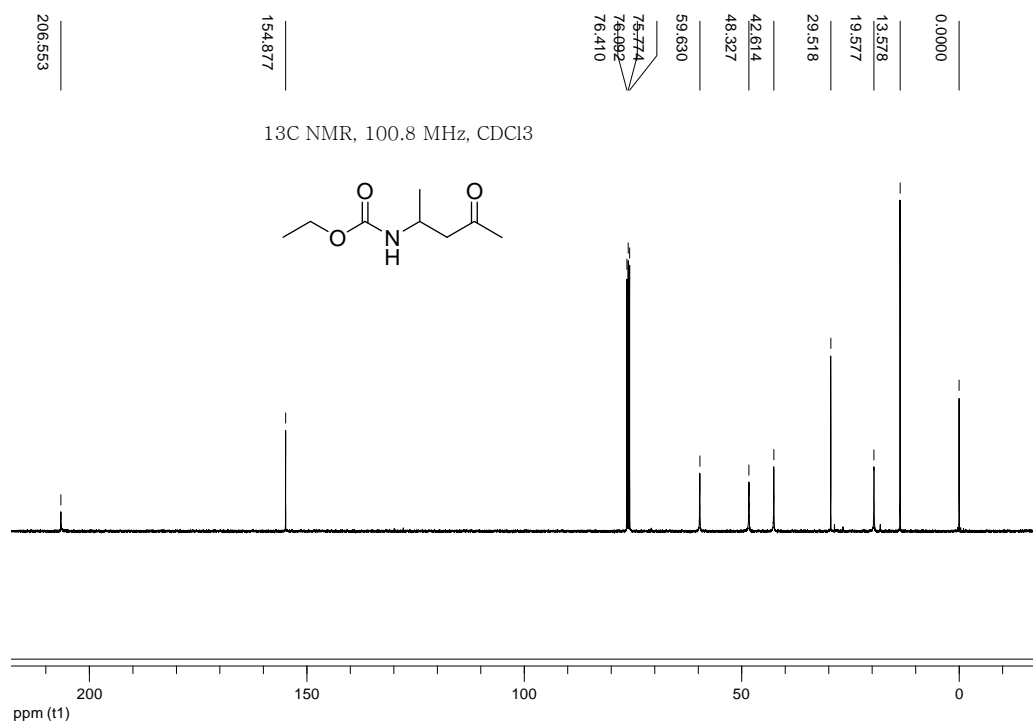

### Ethyl (1-methyl-3-oxo-3-phenylpropyl)carbamate

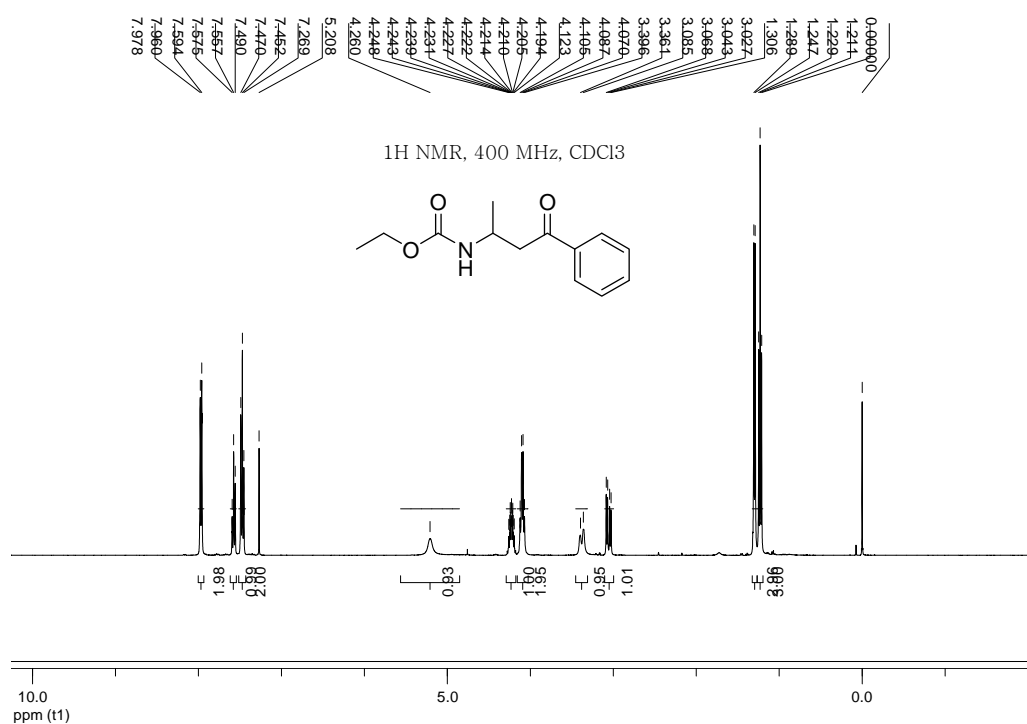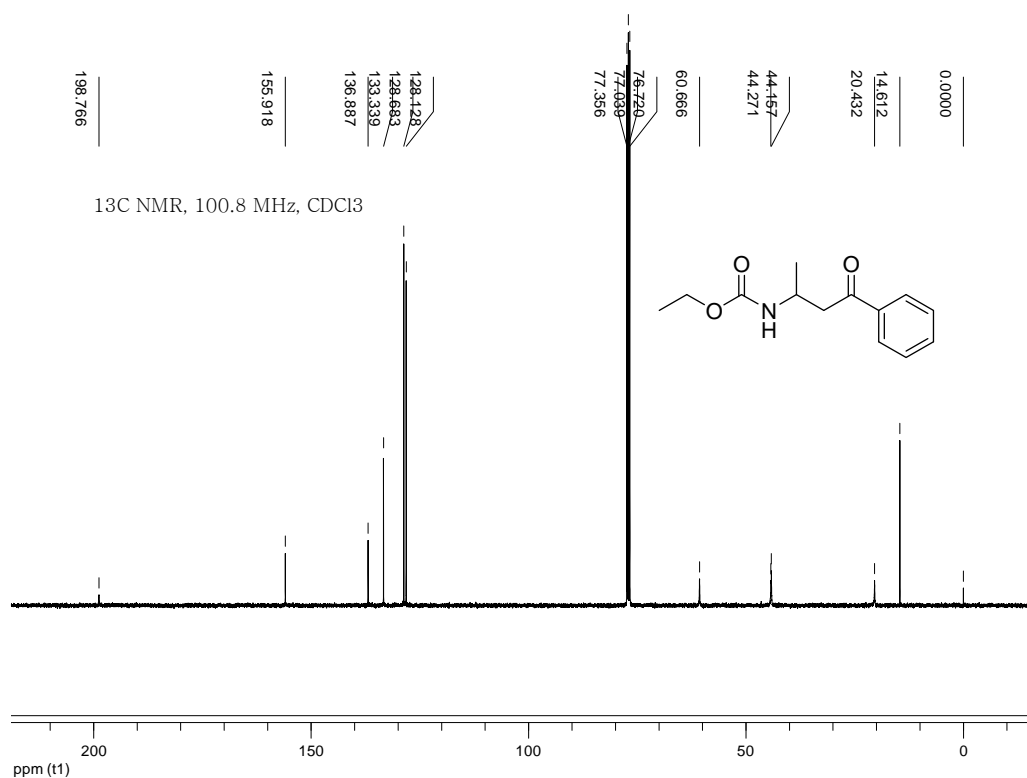

### Ethyl 3-oxocyclohexylcarbamate

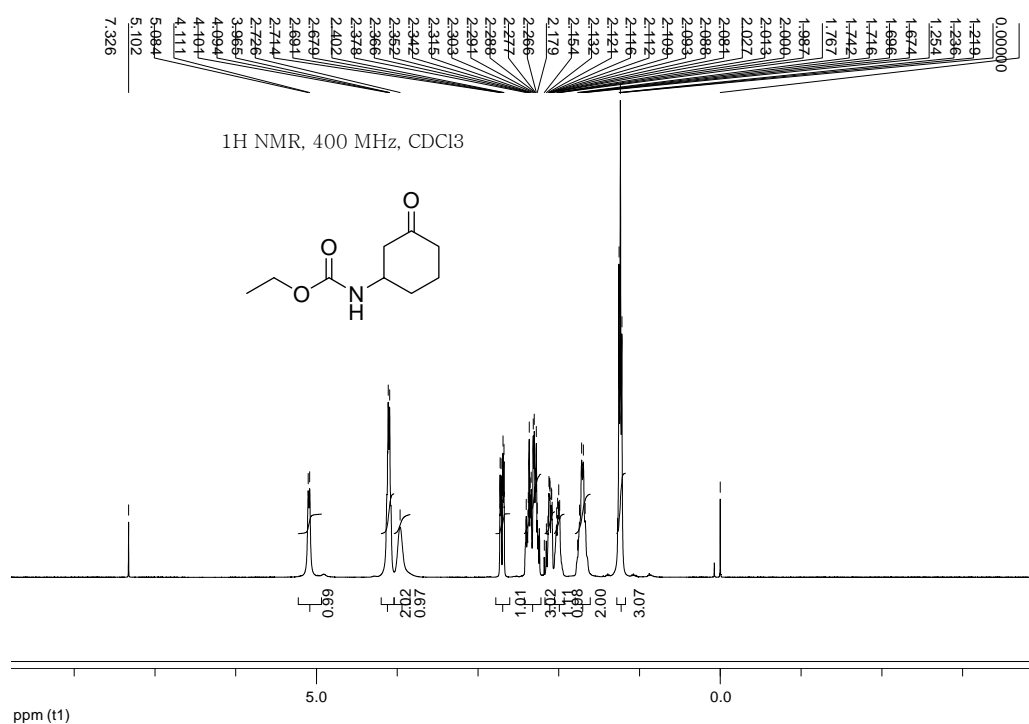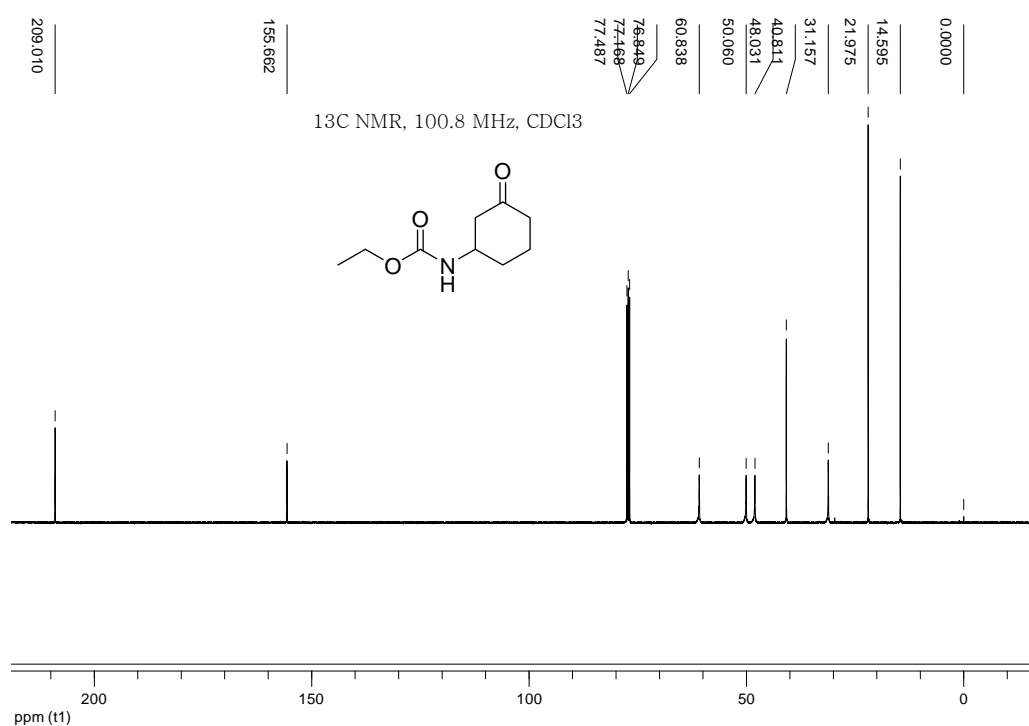



### 3-(4-methoxyphenylsulfanyl)-1,3-diphenylpropan-1-one

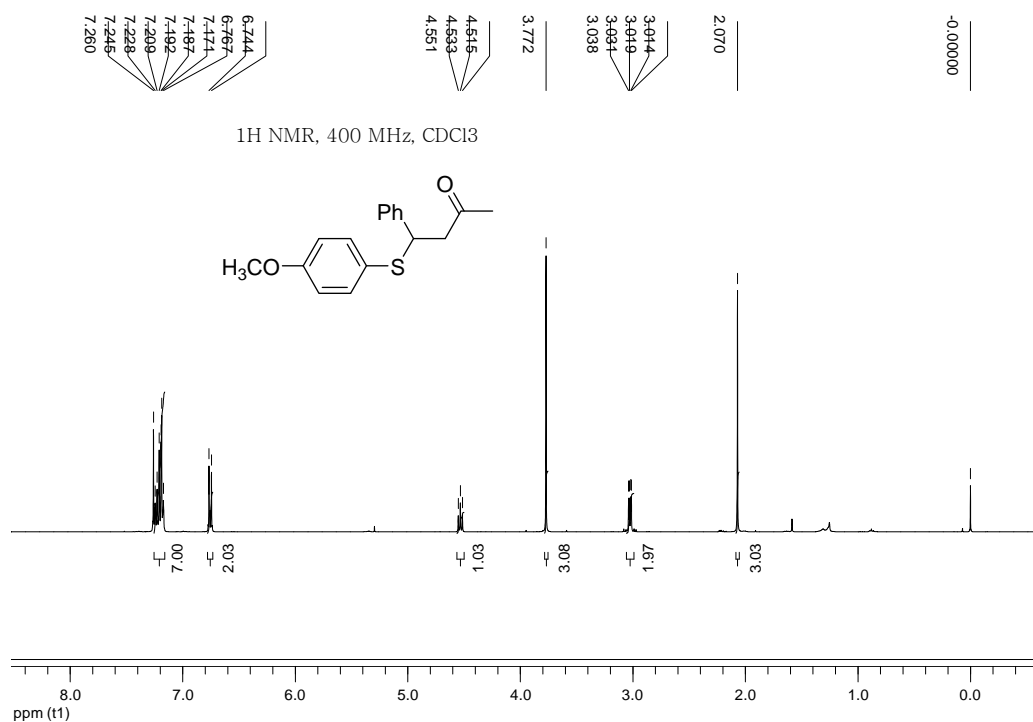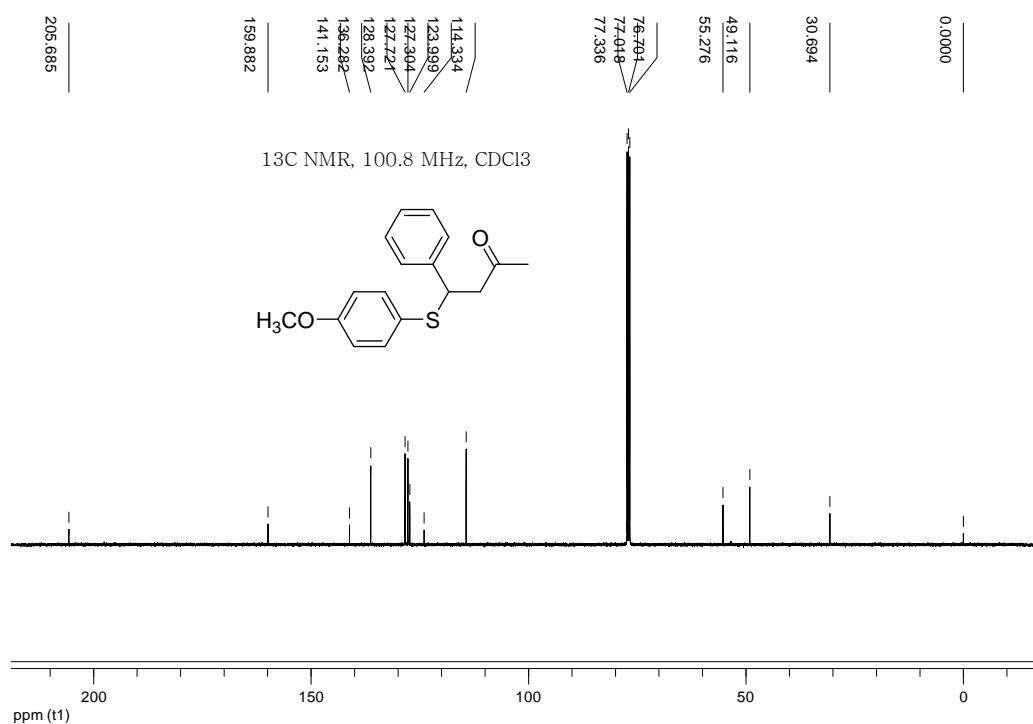

### 3-(4-Chlorophenylthio)cyclohexanone

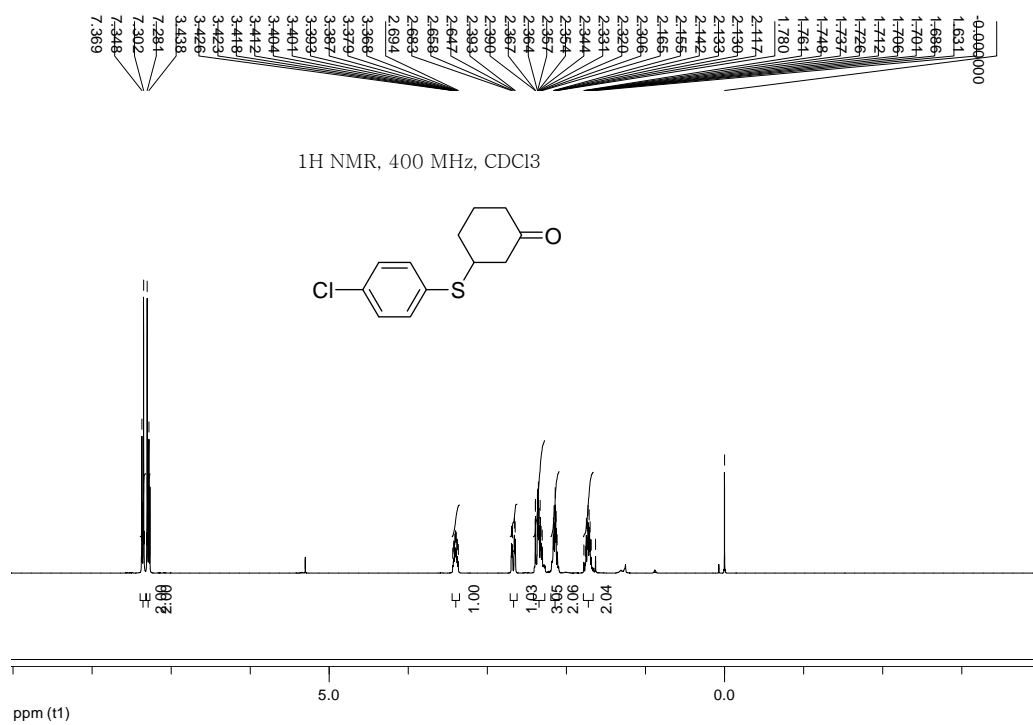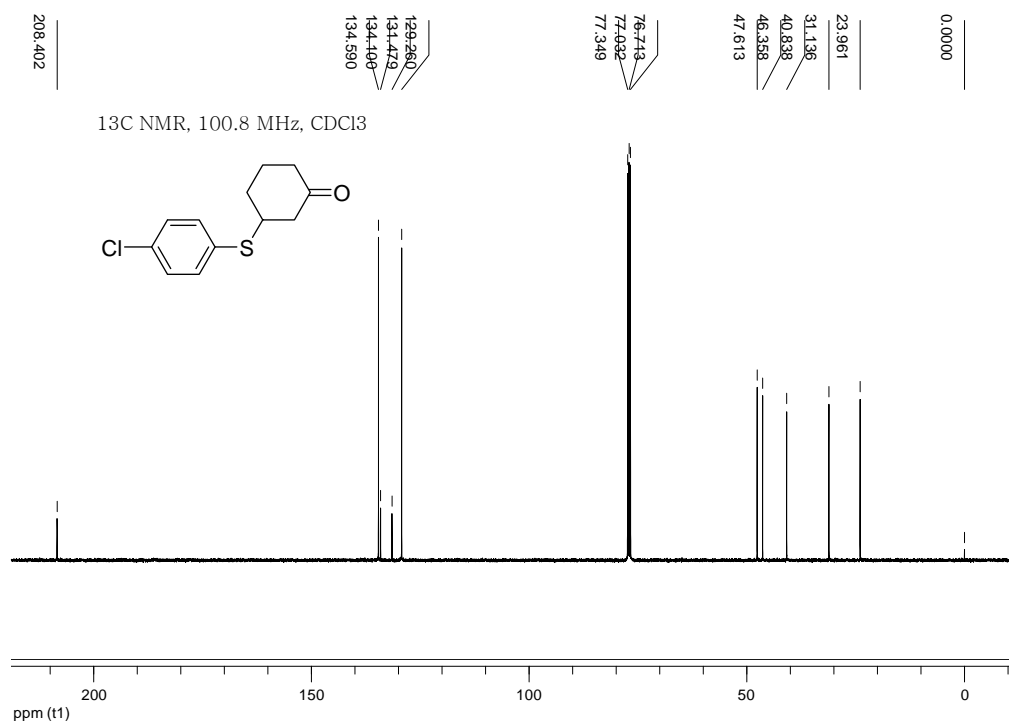

### 3-(4-Methylphenylthio) cyclohexan-1-one

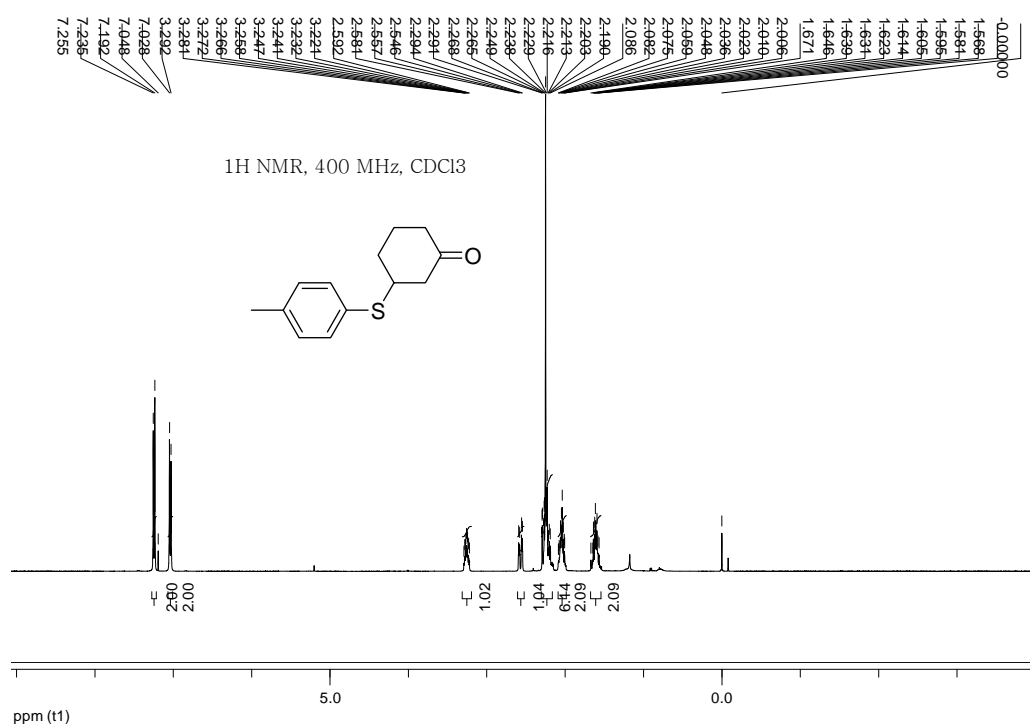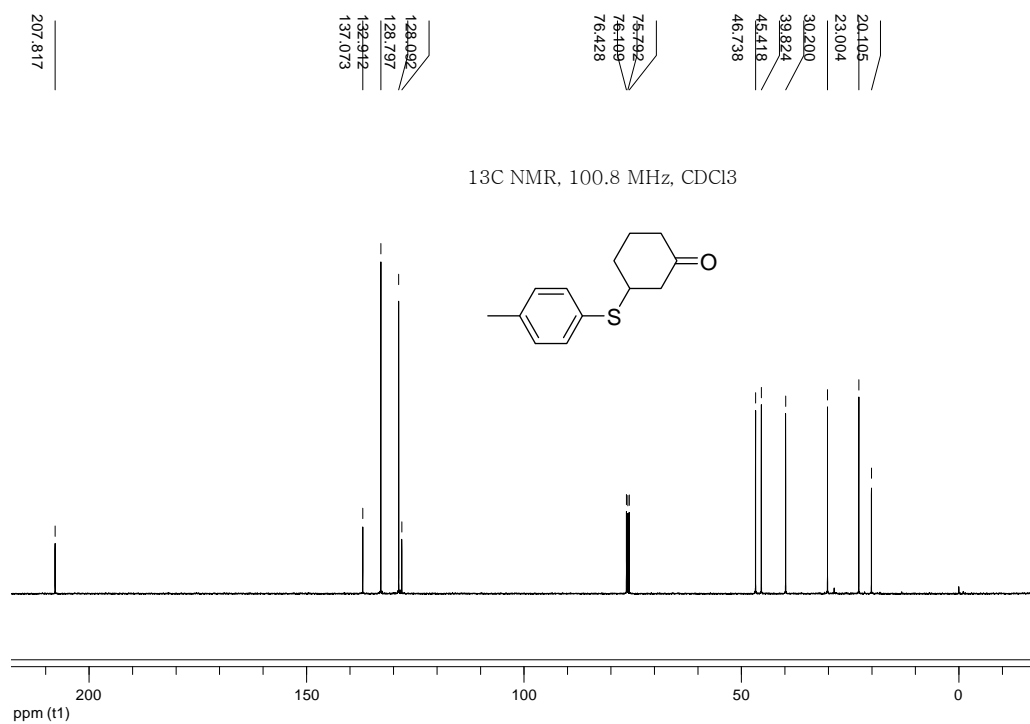

4-(5-phenyl-2H-tetrazol-2-yl) pentan-2-one

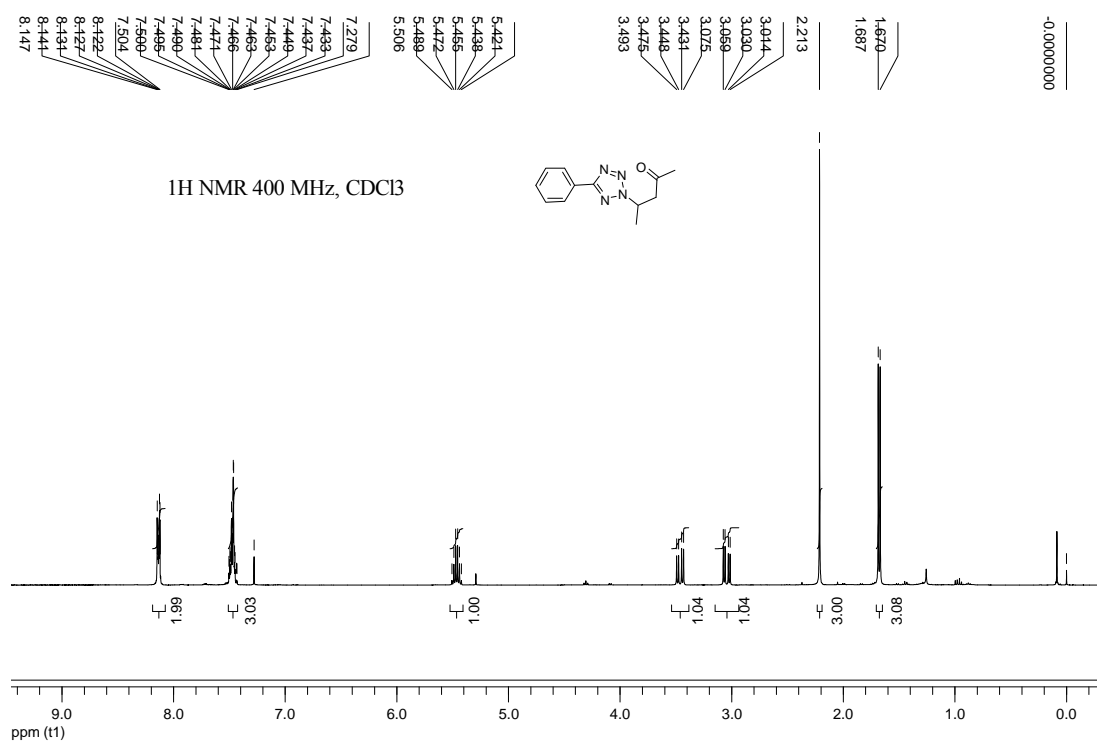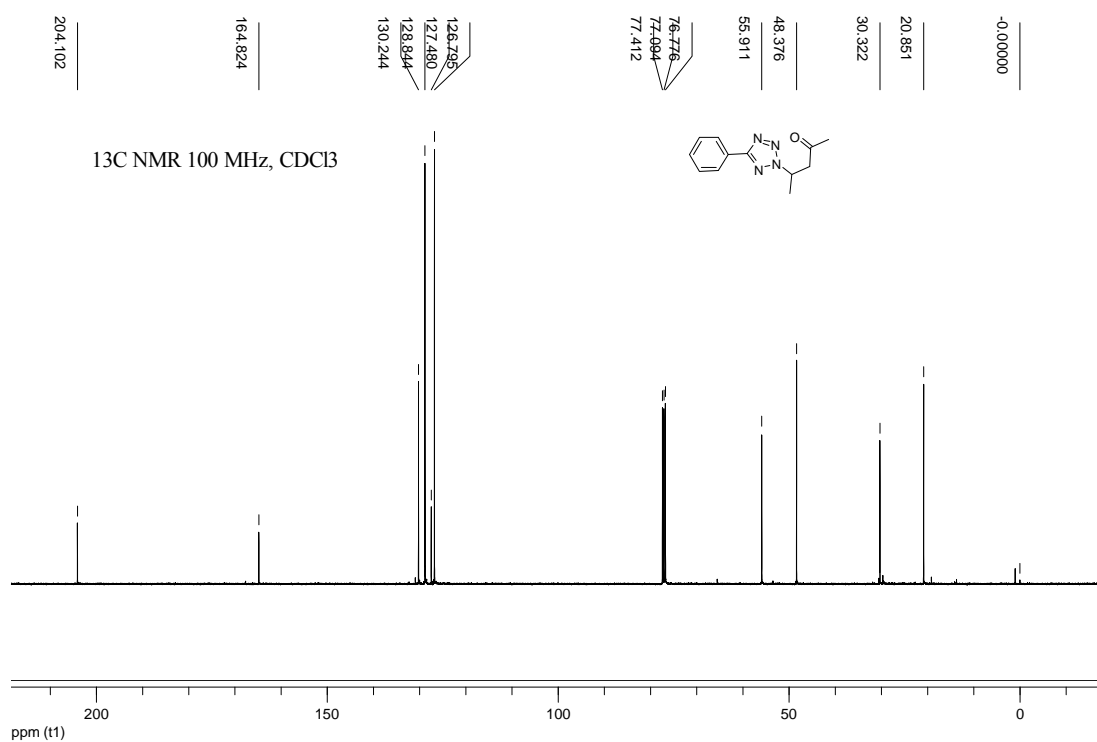

### 4-(4-Methoxyphenylthio) pentan-2-one

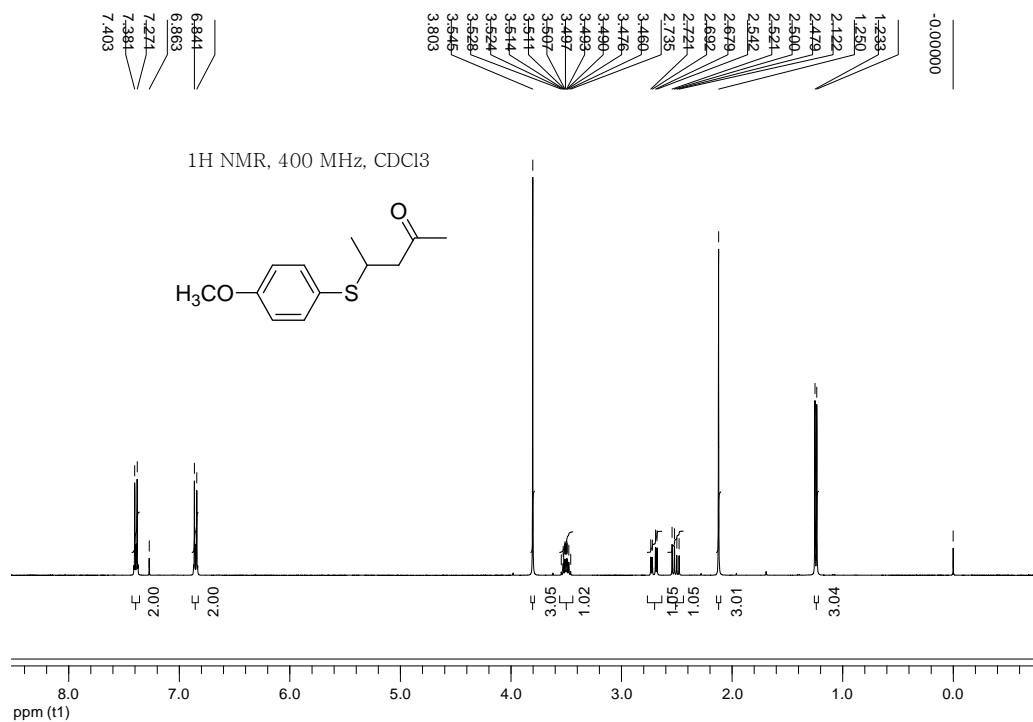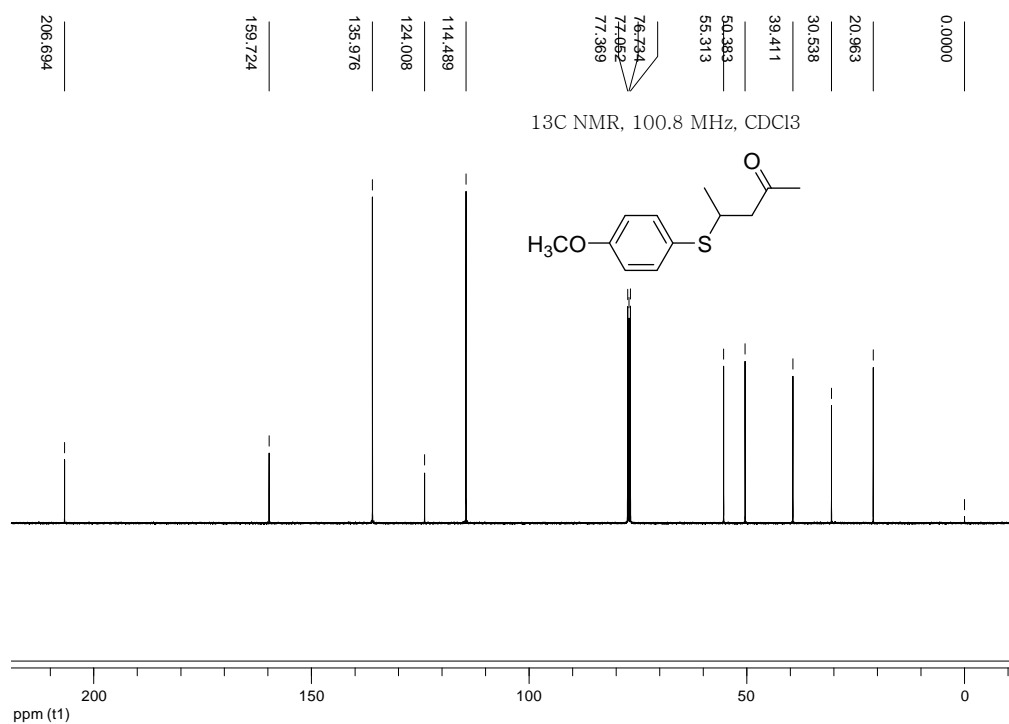

### 3-(naphthalen-2-ylthio)cyclohexanone

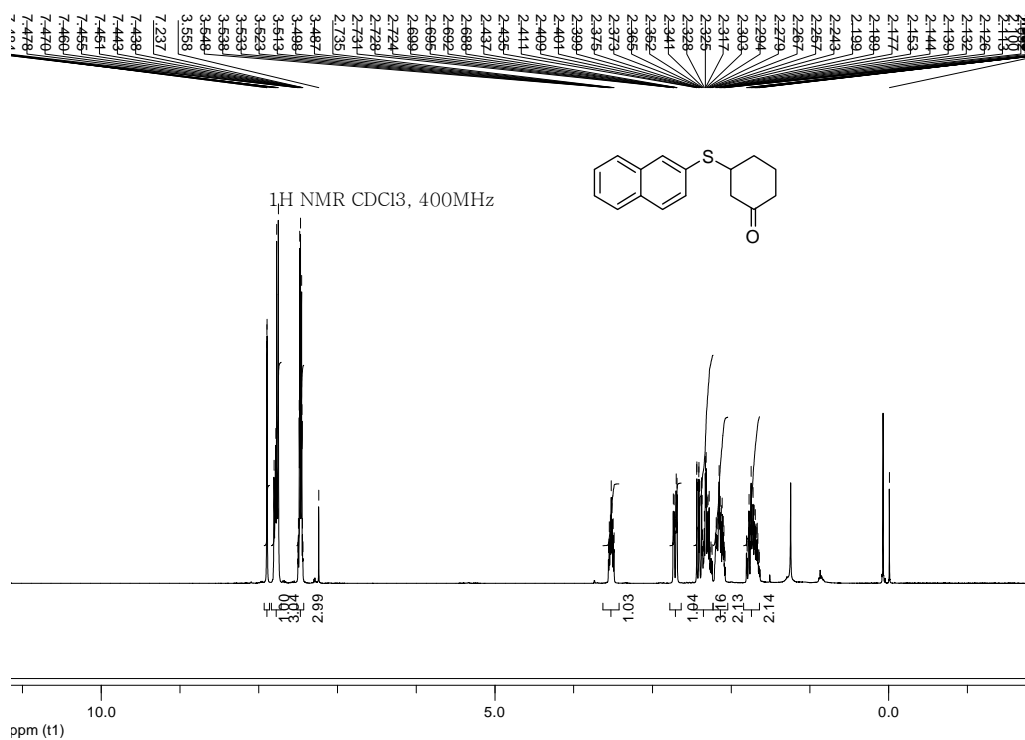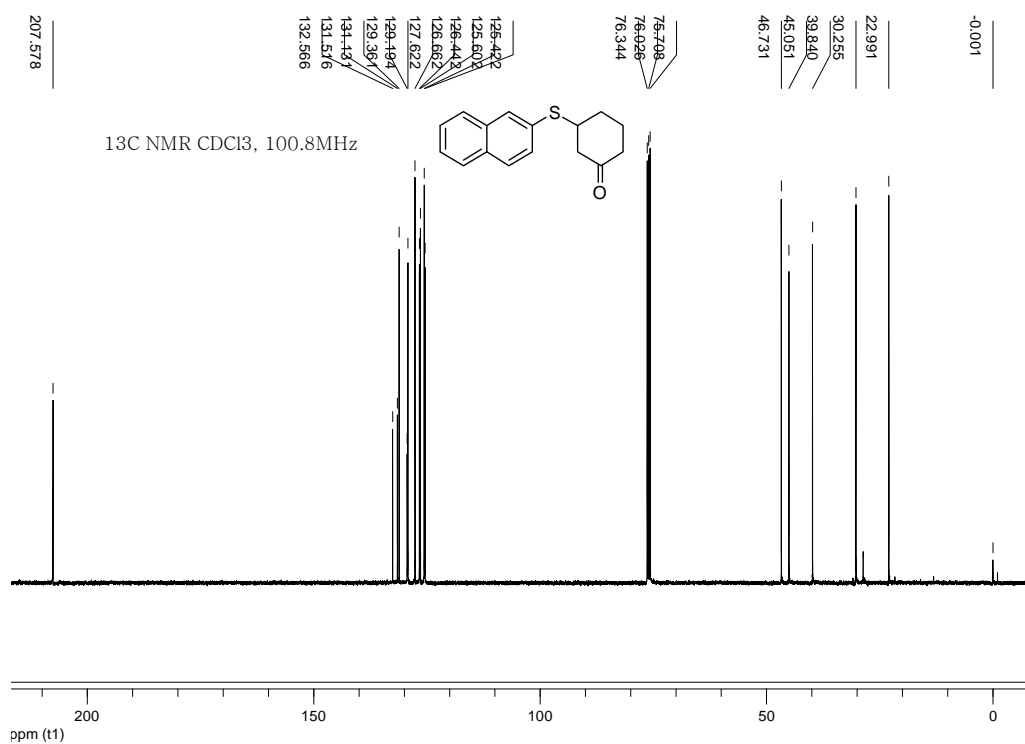

### 1-Phenyl-3-(1*H*-1,2,4-triazol-1-yl)butan-1-one

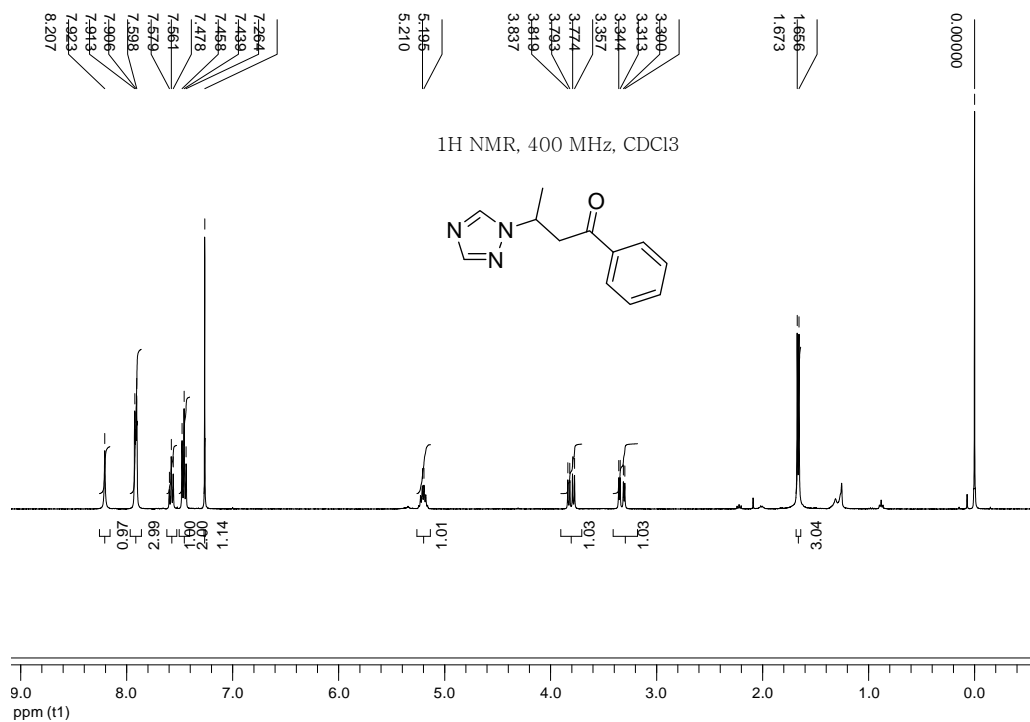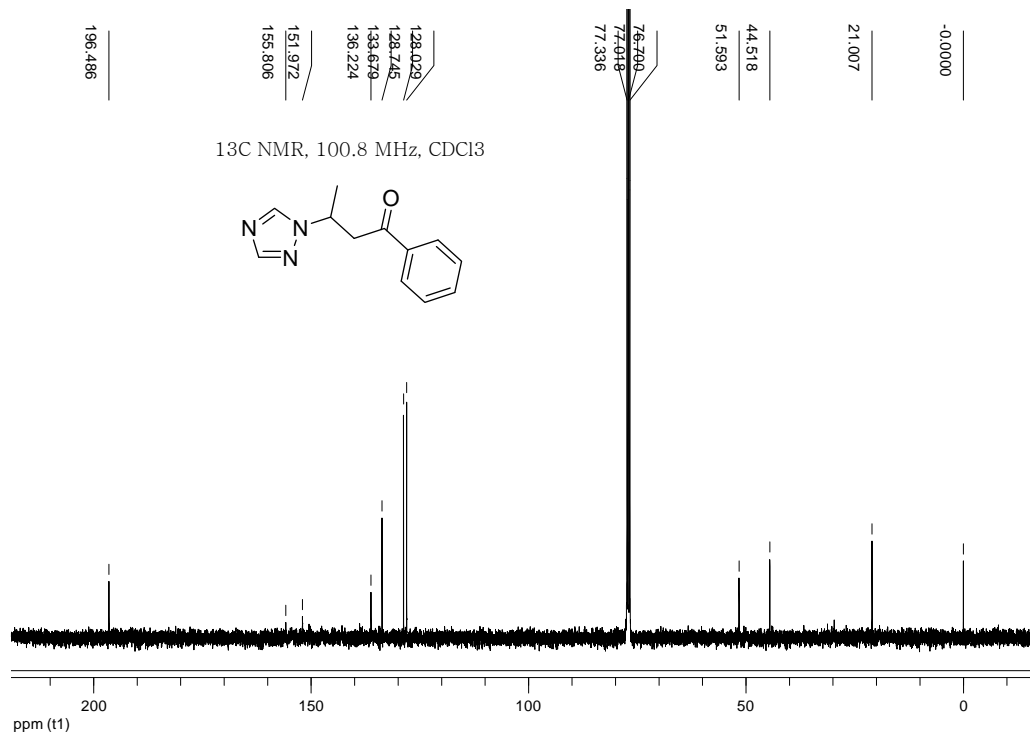

### 3-(*o*-Tolylthio)cyclohexanone

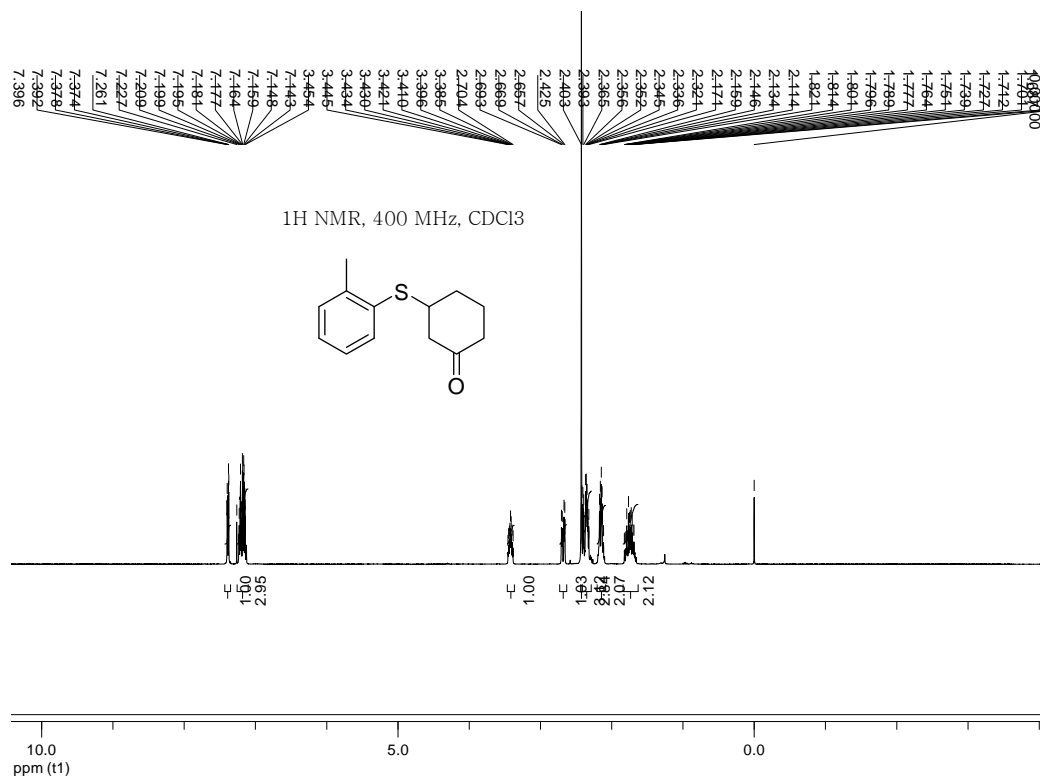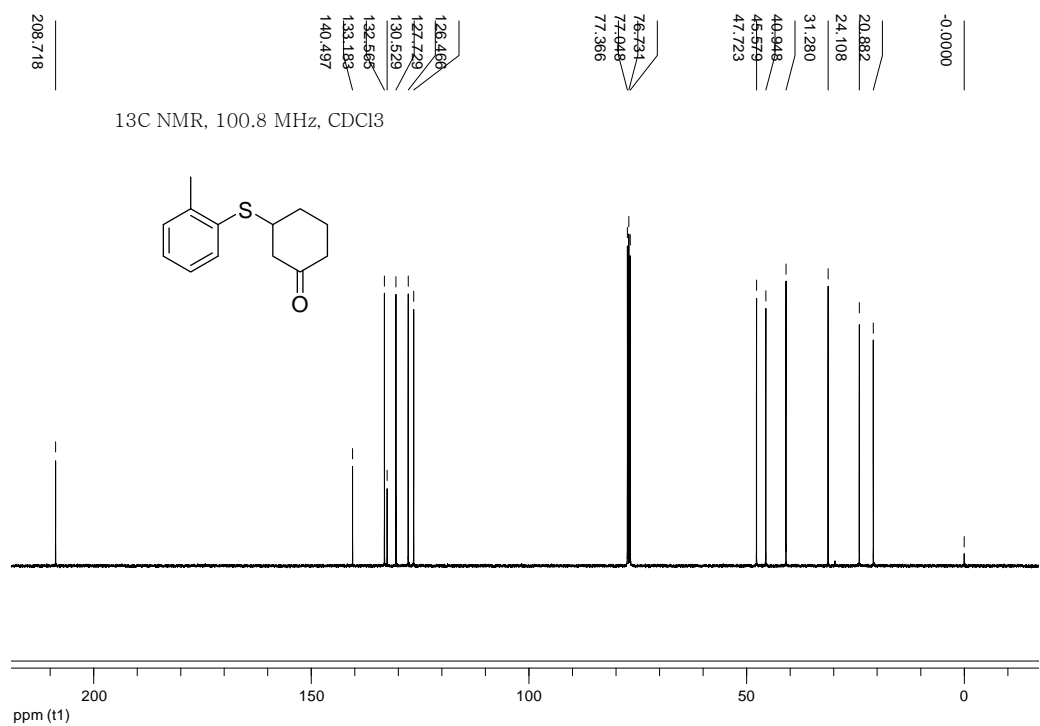



### Benzyl 4-oxopentan-2-ylcarbamate

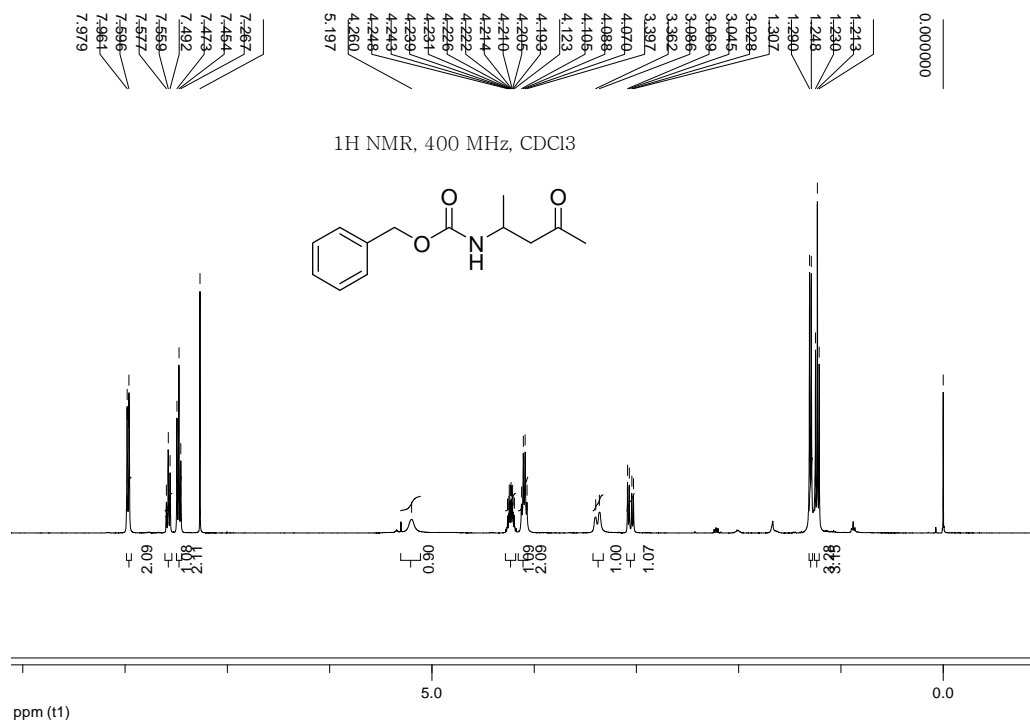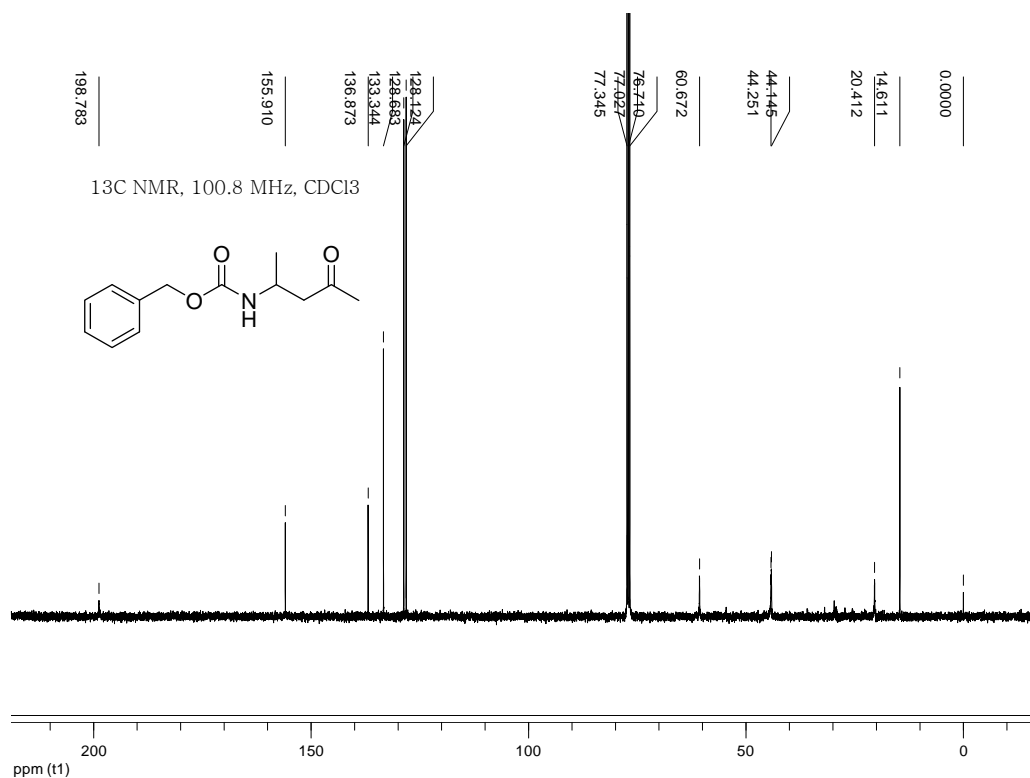

### 3-(imidazol-1-yl)-1-phenylbutan-1-one

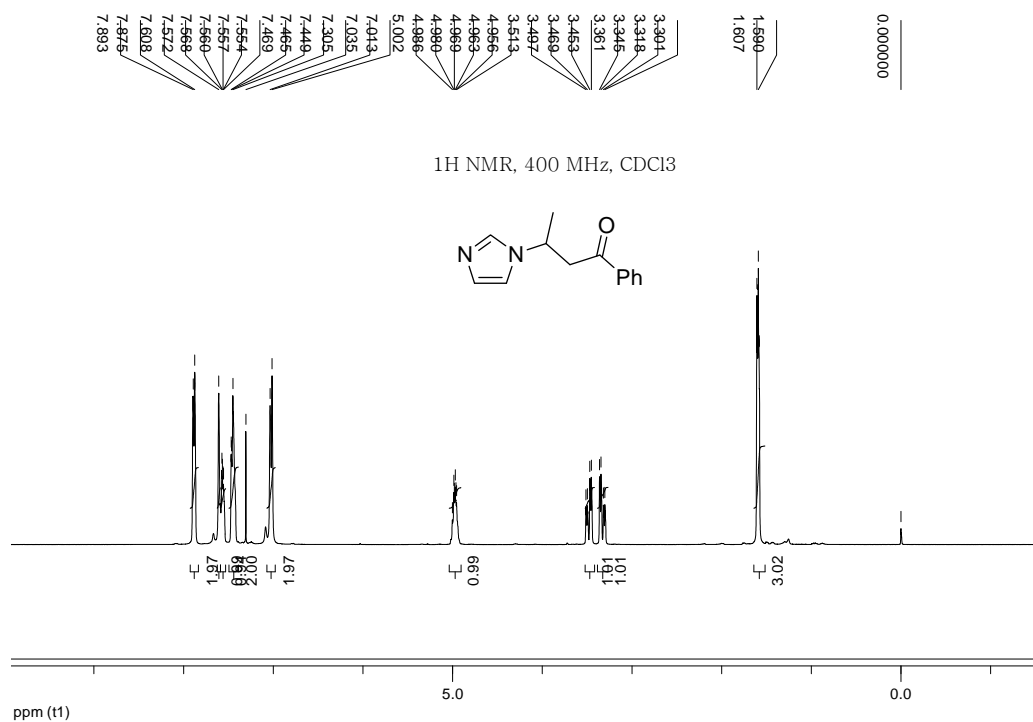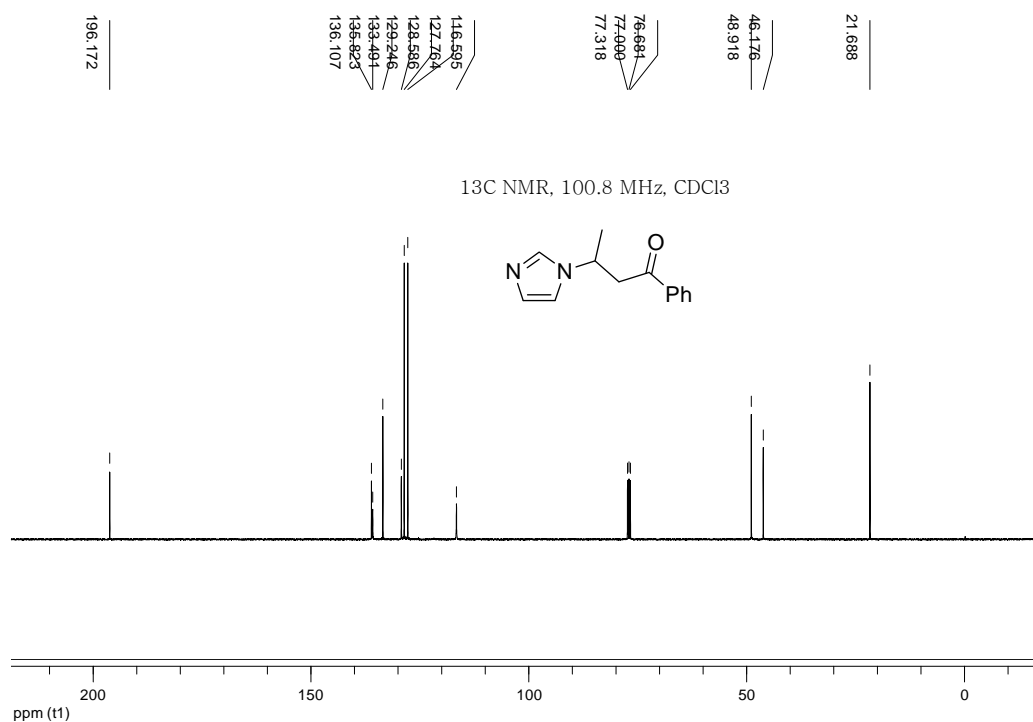

### 1-Phenyl-3-(4*H*-1,2,4-triazol-4-yl)butan-1-one

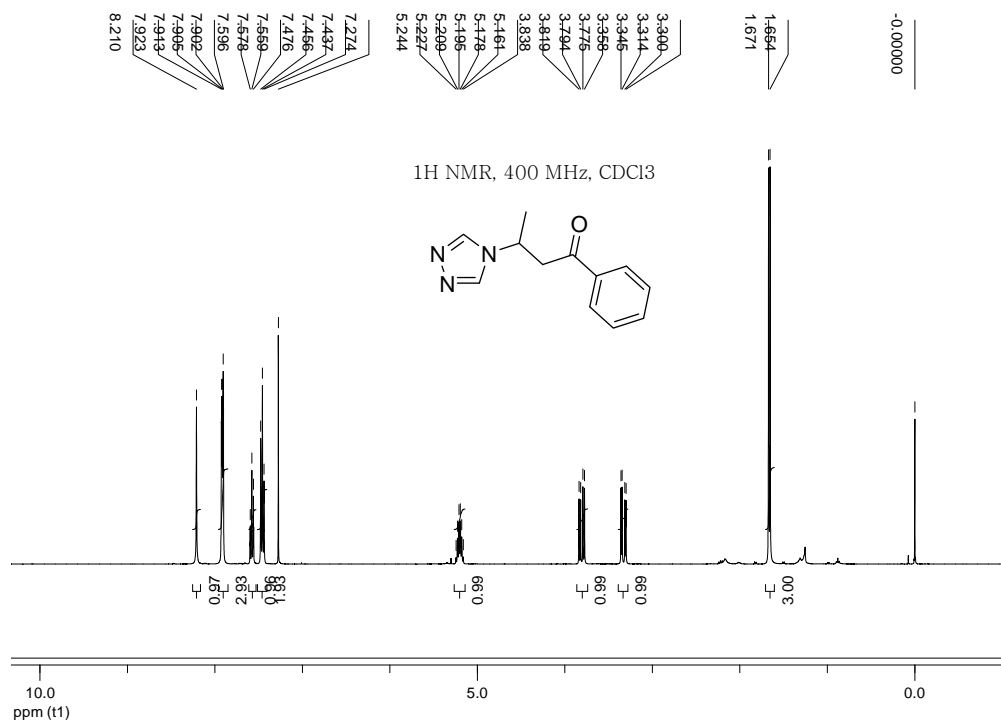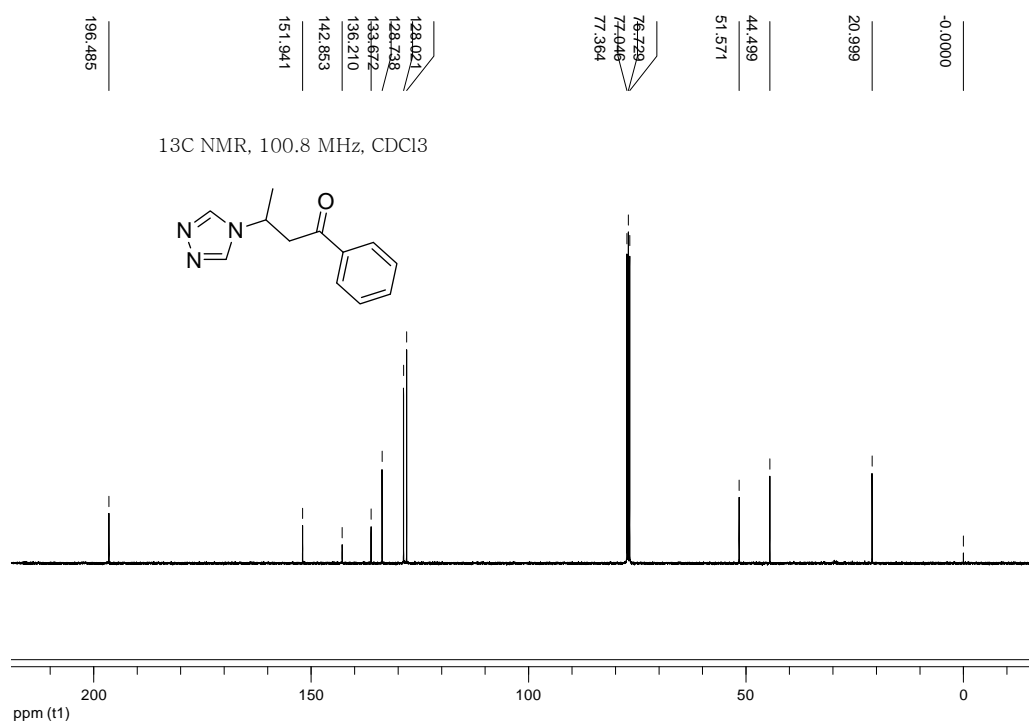



4-(1*H*-Benzo[d]imidazol-1-yl)pentan-2-one

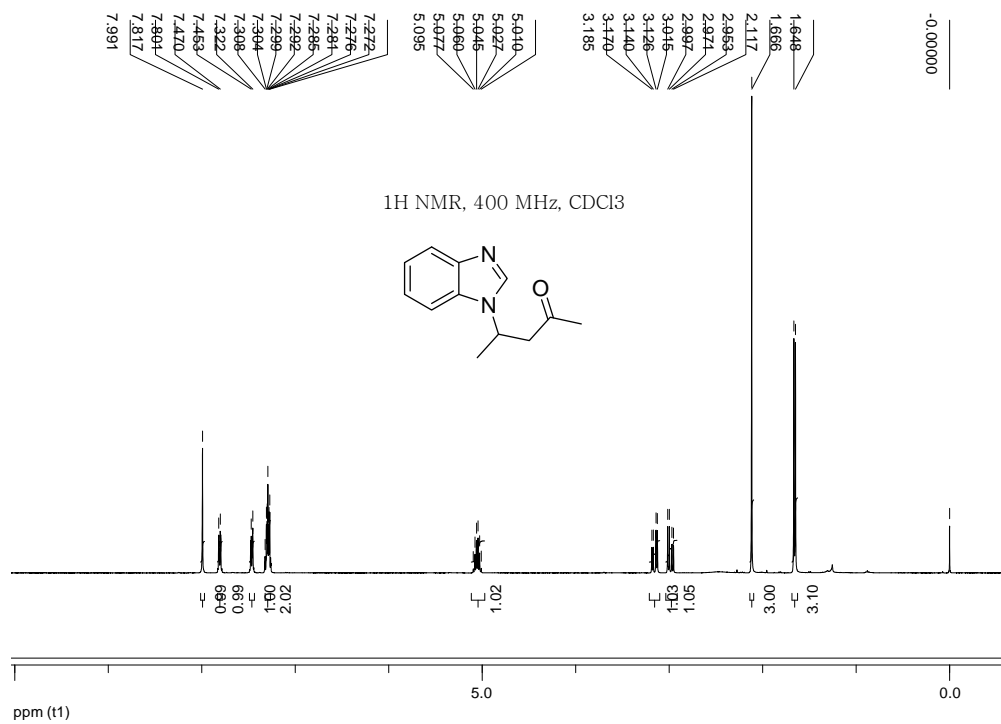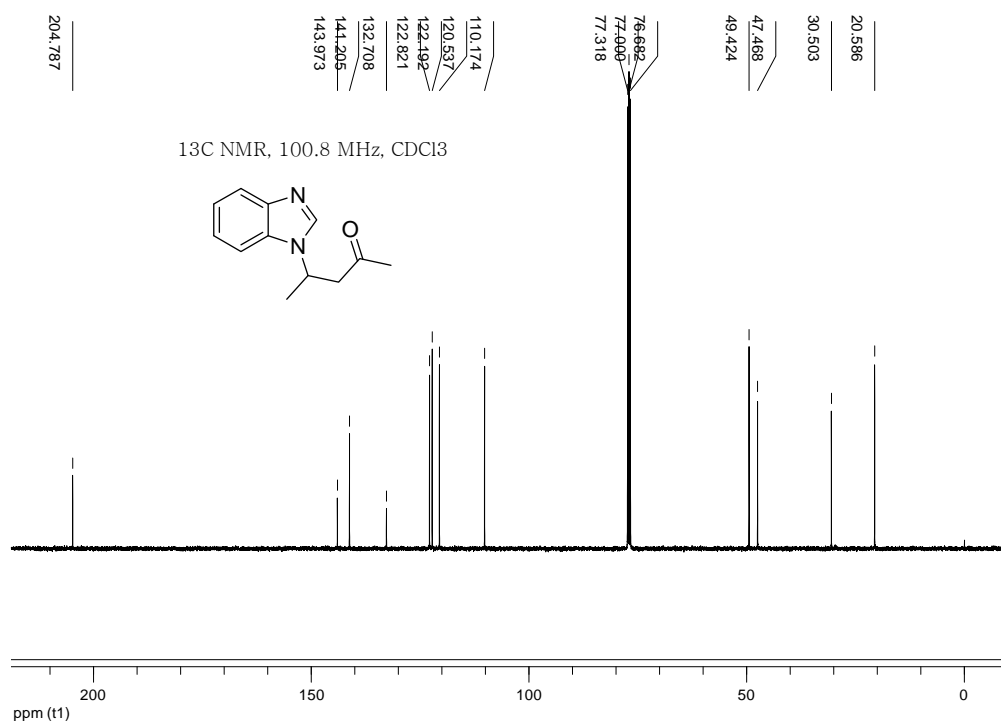

### Ethyl 3-oxopentylcarbamate

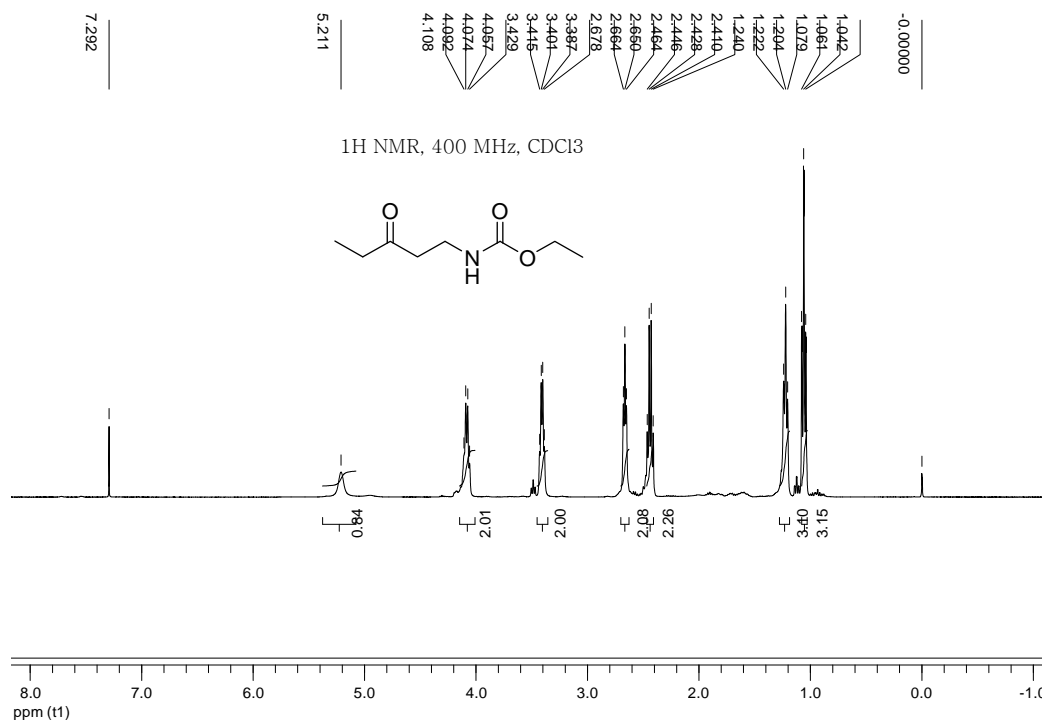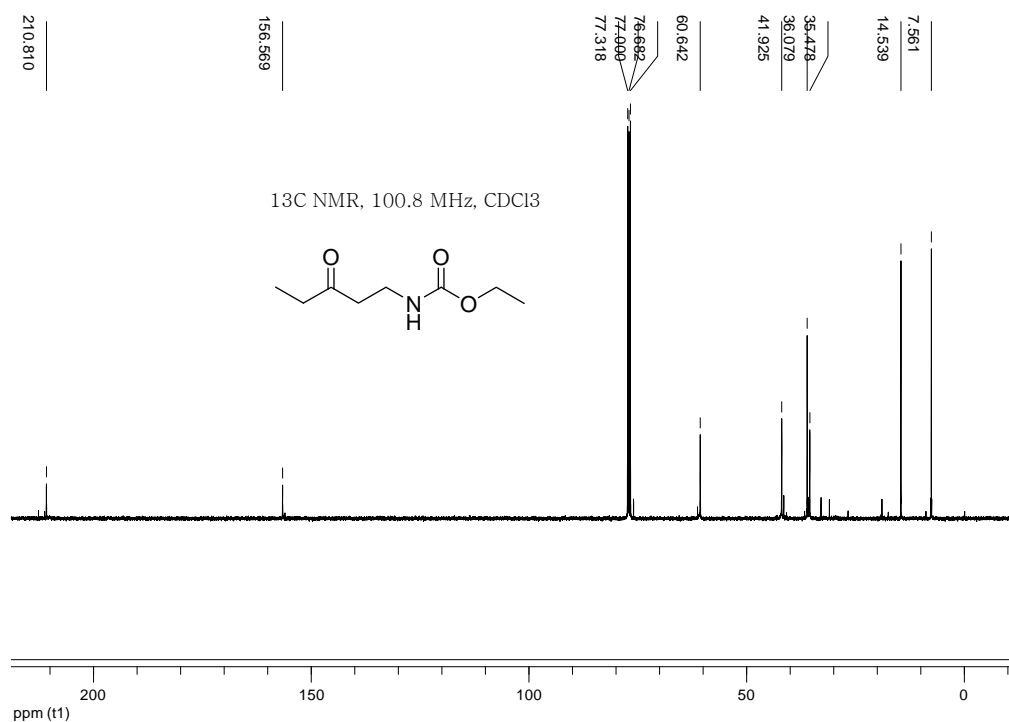

### 4-(1*H*-imidazol-1-yl)pentan-2-one

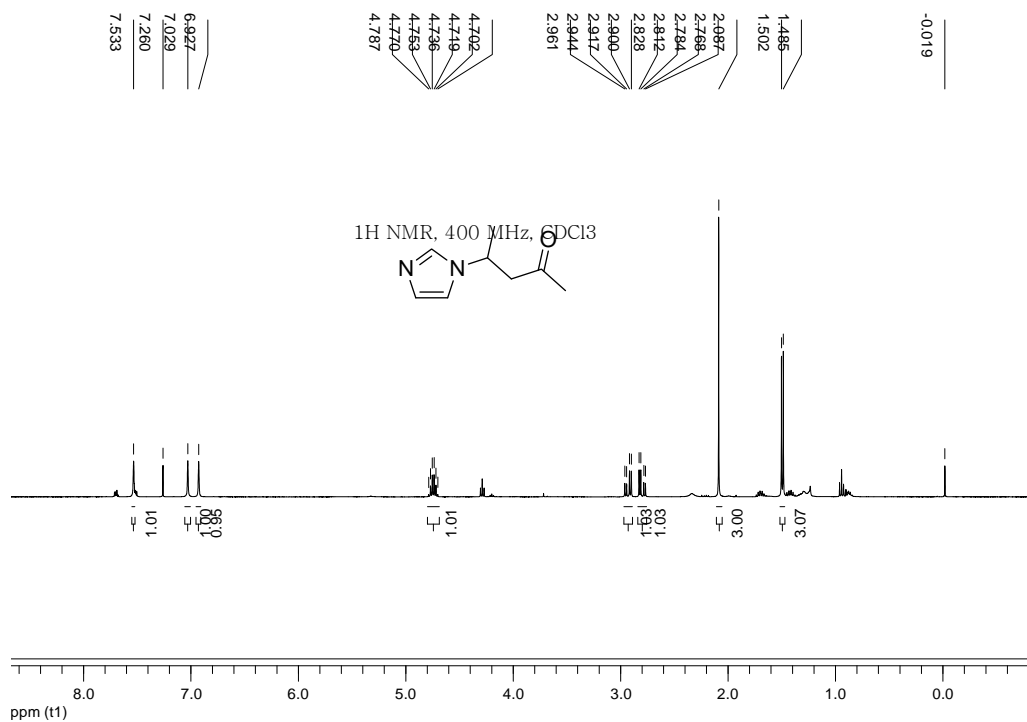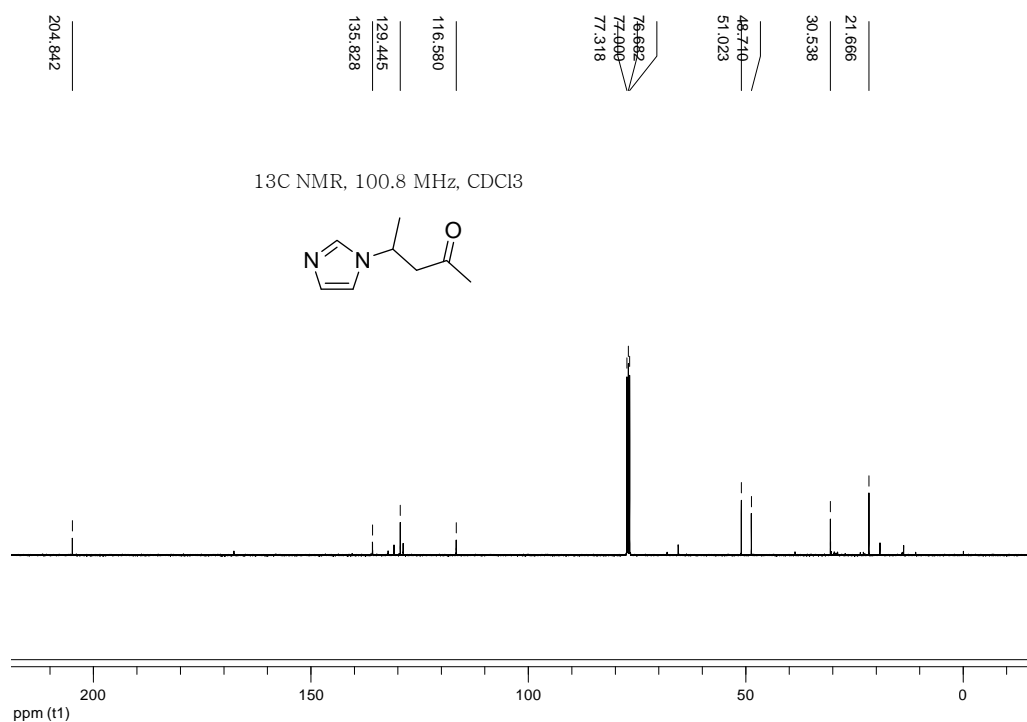

4-(1*H*-pyrazol-1-yl)pentan-2-one

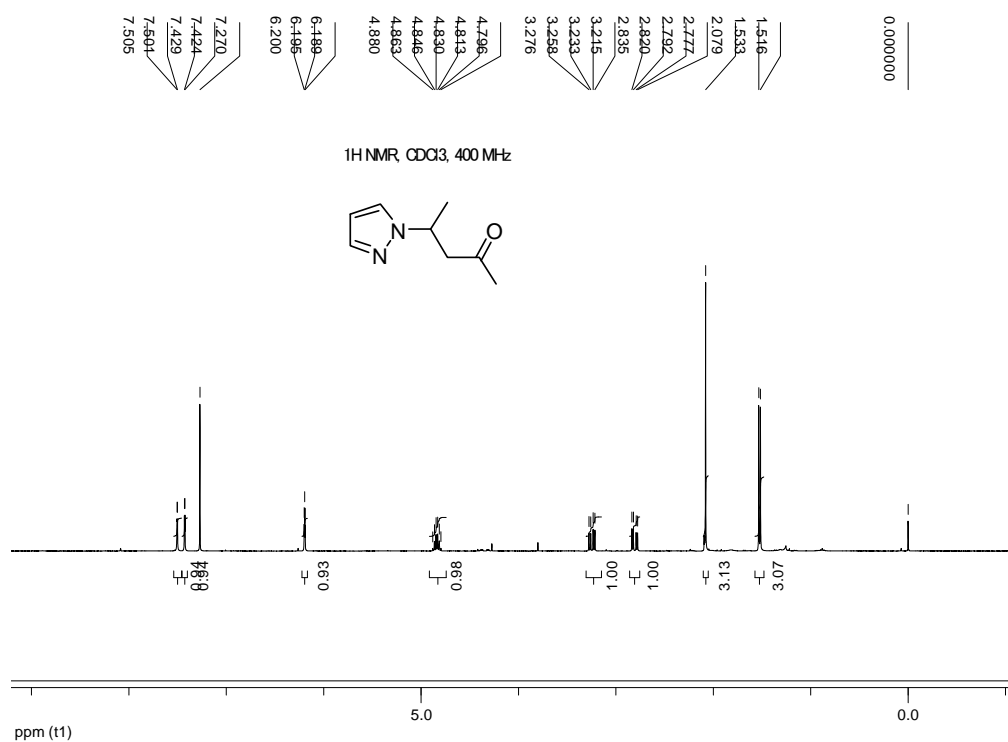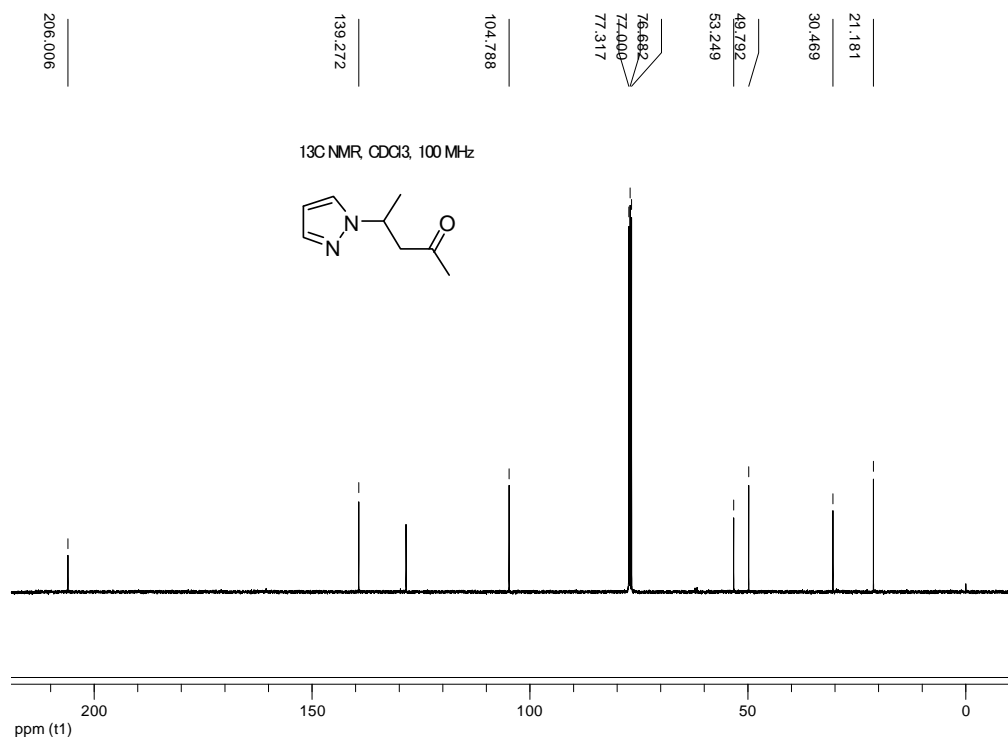



### 3-methoxy-1-phenylpyrrolidine-2,5-dione

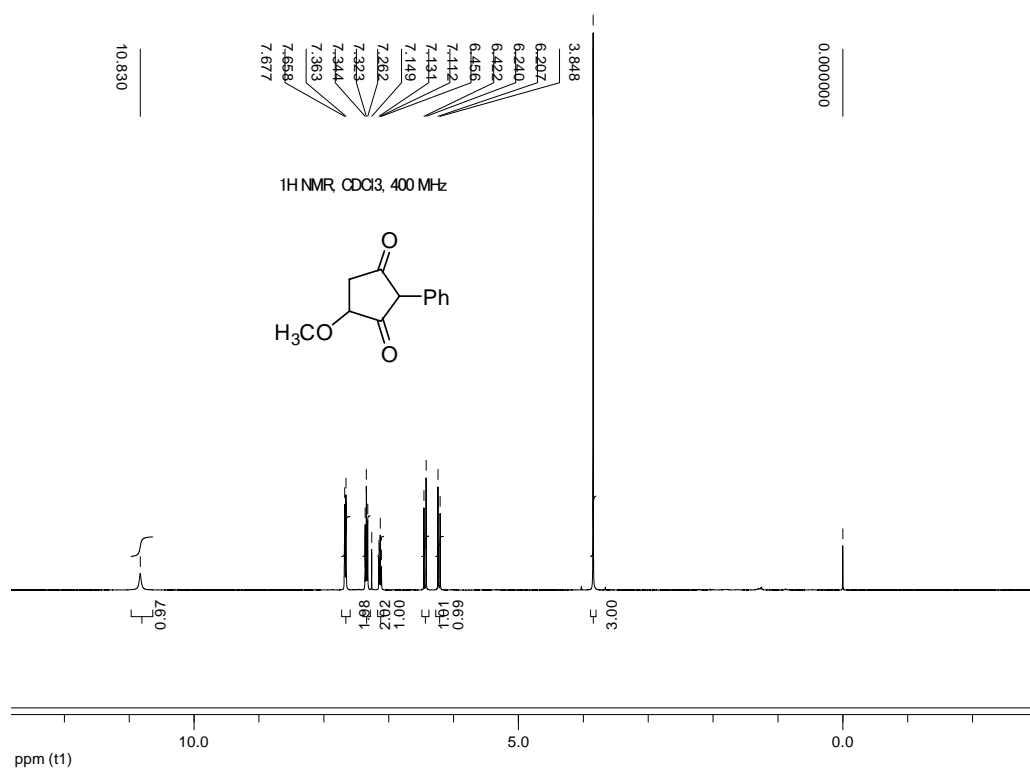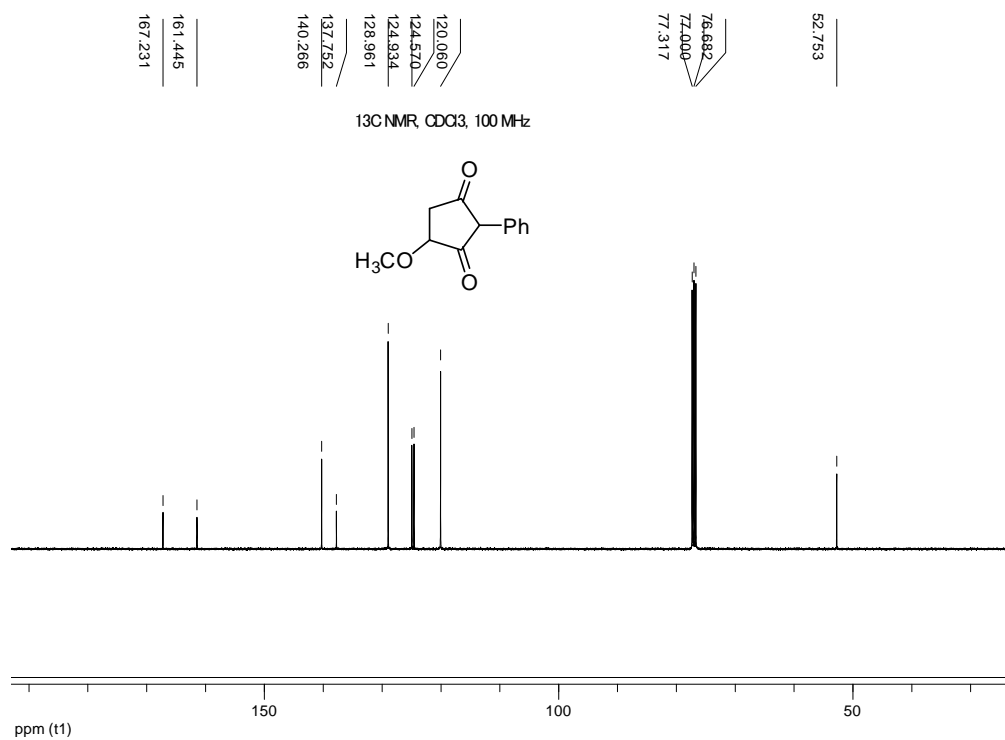

### 4-methoxypentan-2-one

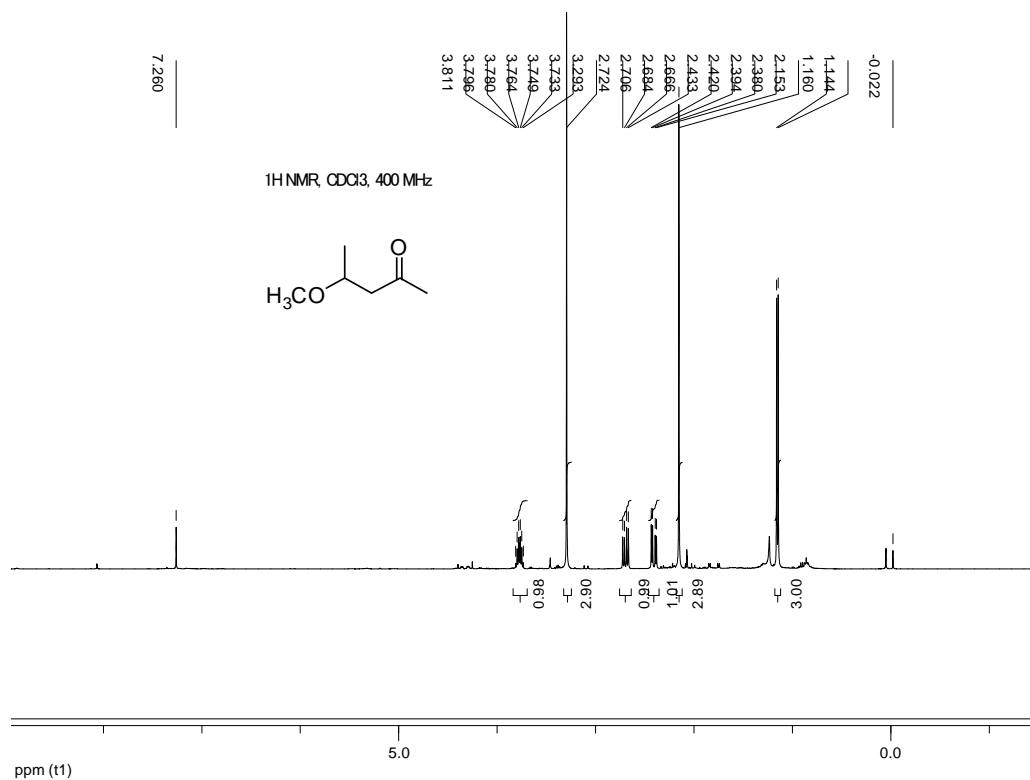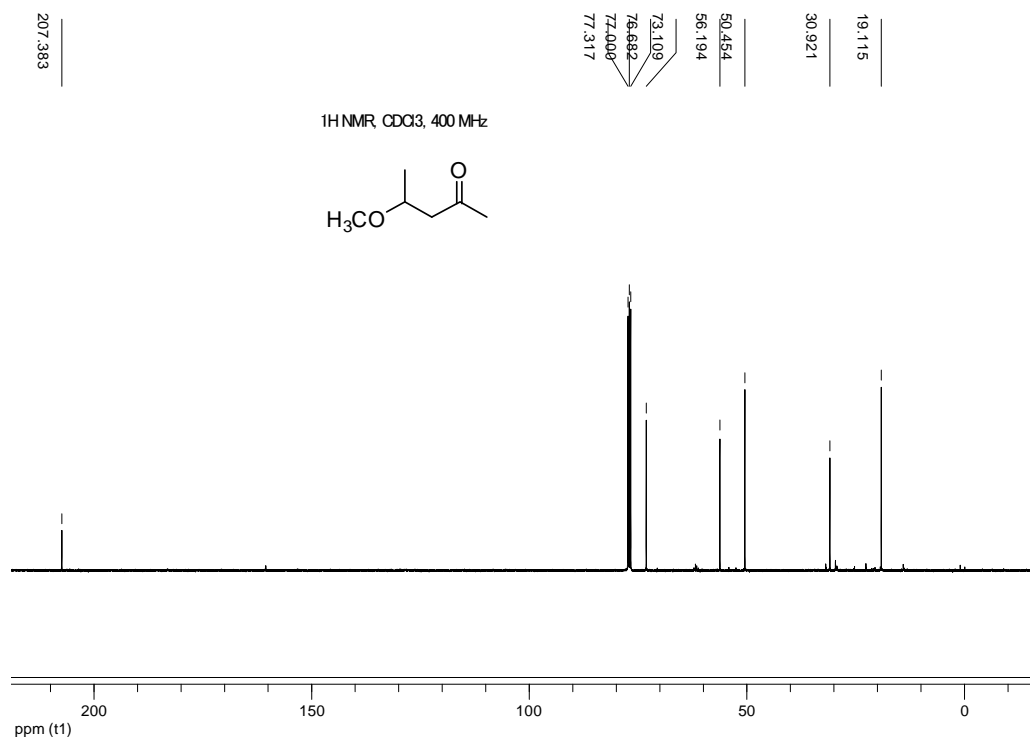

### 4-ethoxypentan-2-one

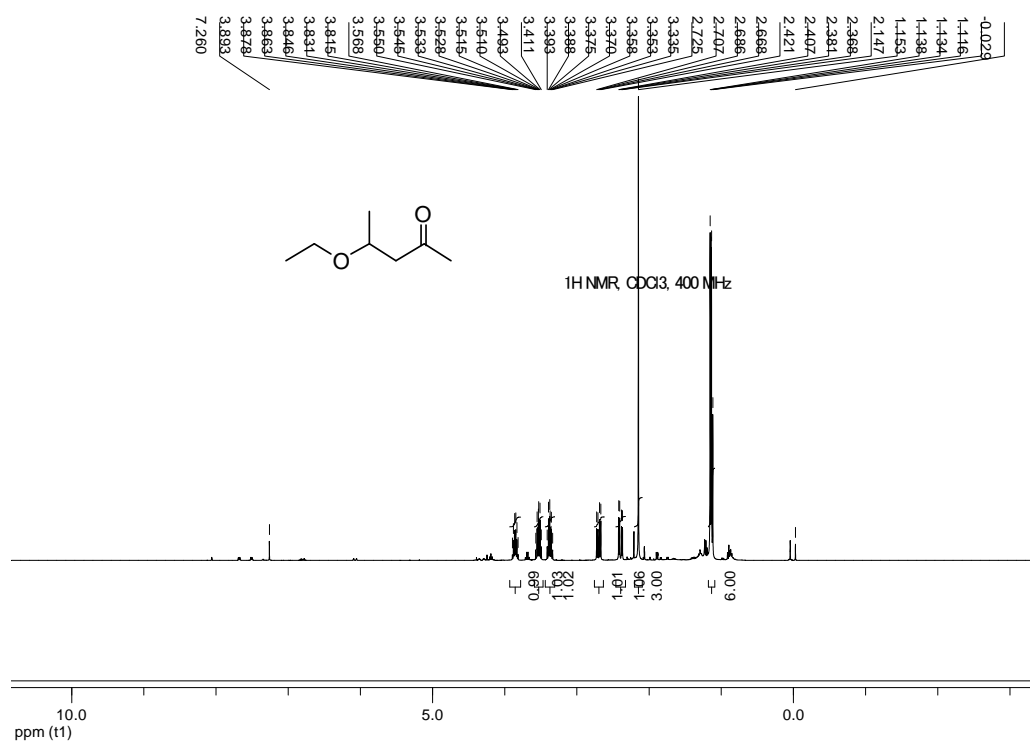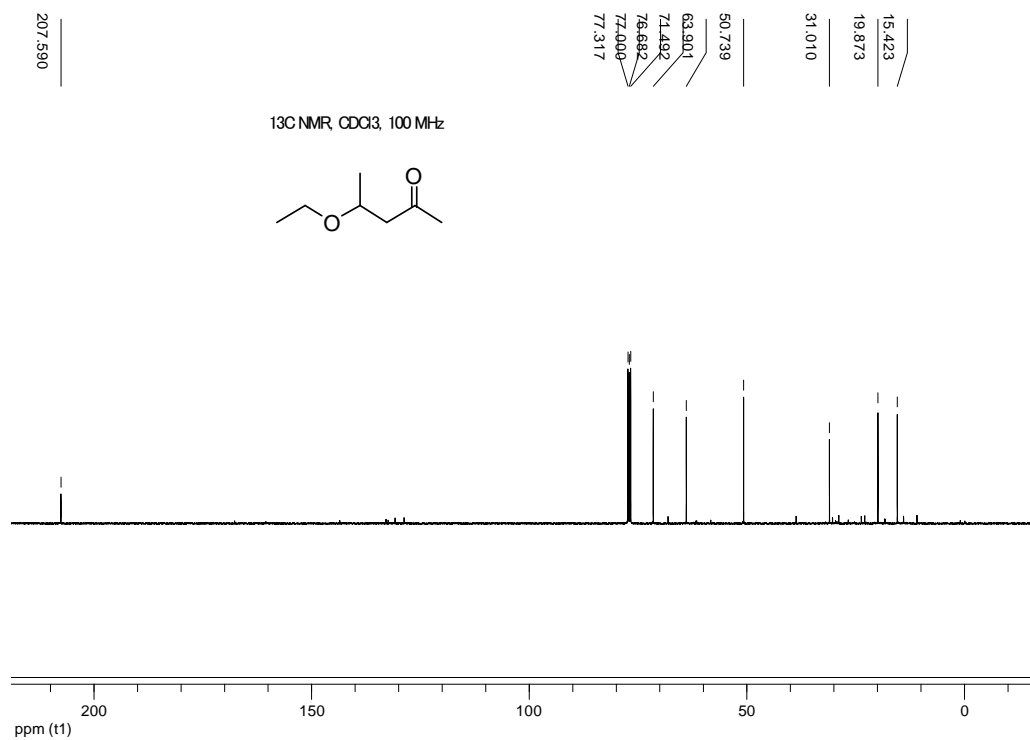

### 4-isopropoxybutan-2-one

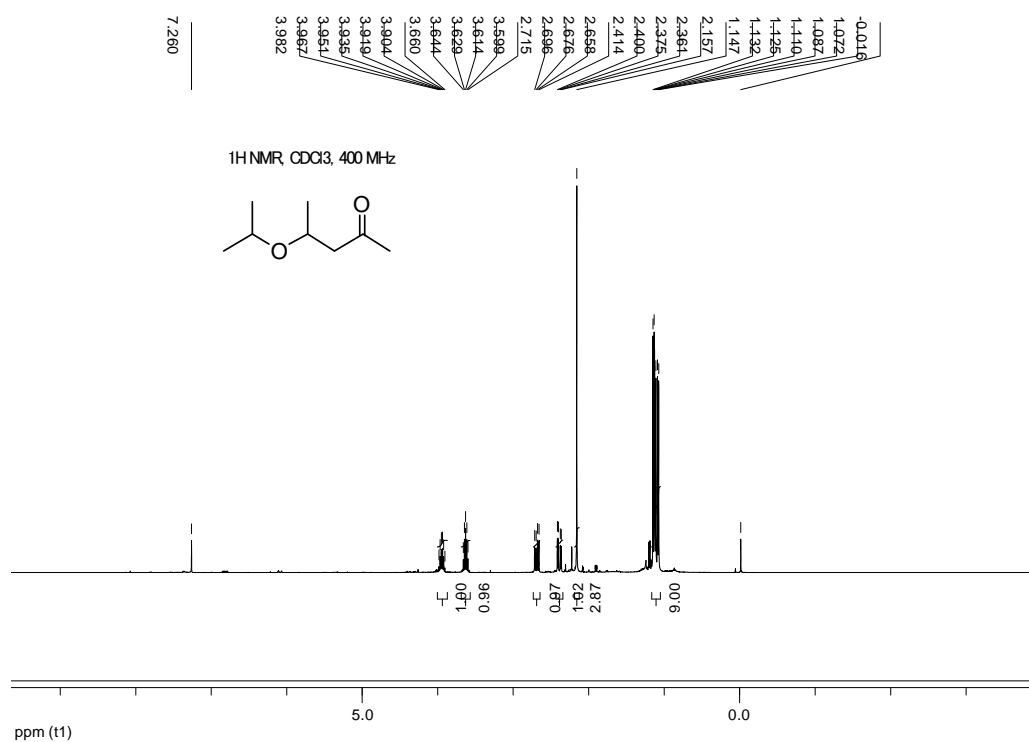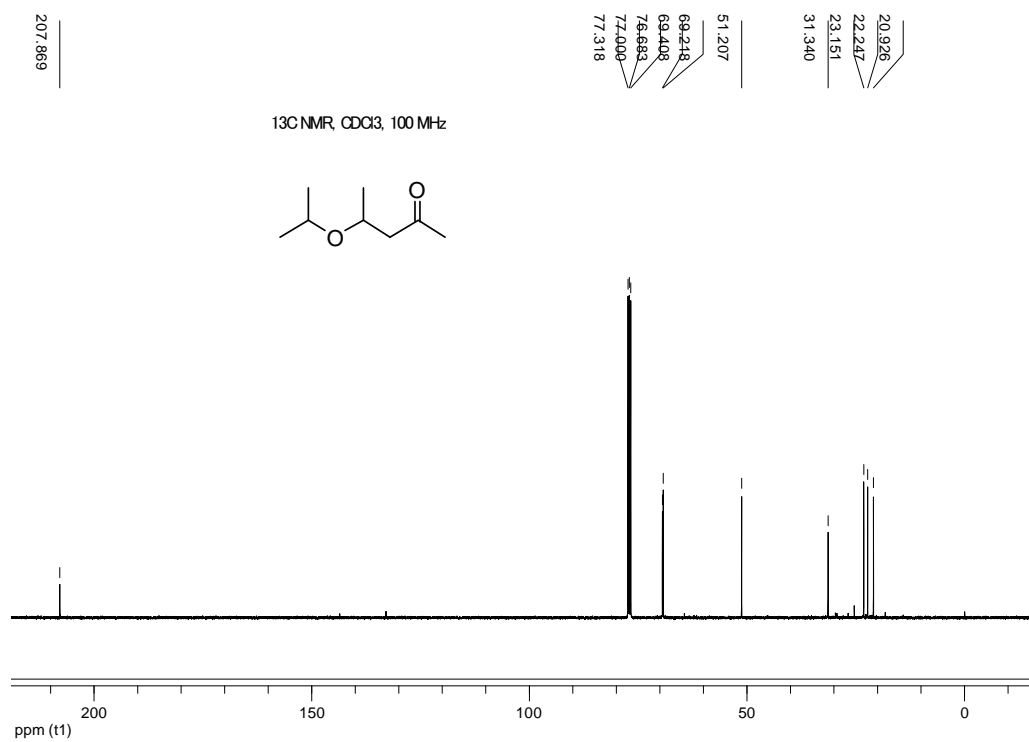

### 4-(benzyloxy)pentan-2-one

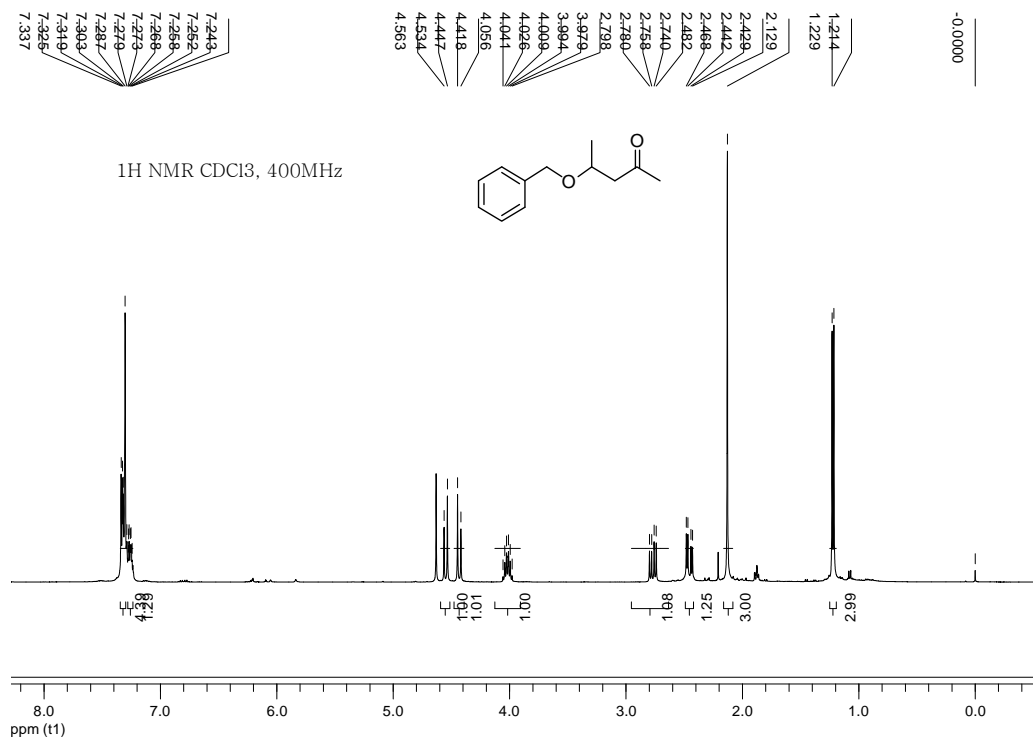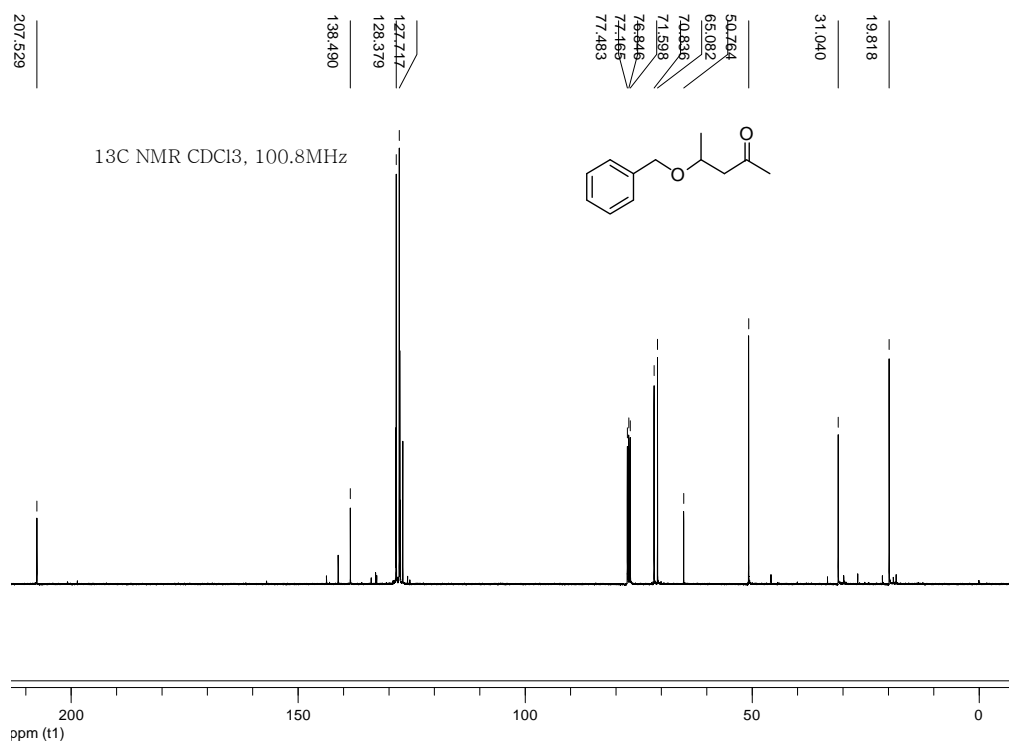

## 8. $^1\text{H}$ NMR and $^{13}\text{C}$ NMR spectra of the ionic liquids

[Hmim] $\text{BF}_4$

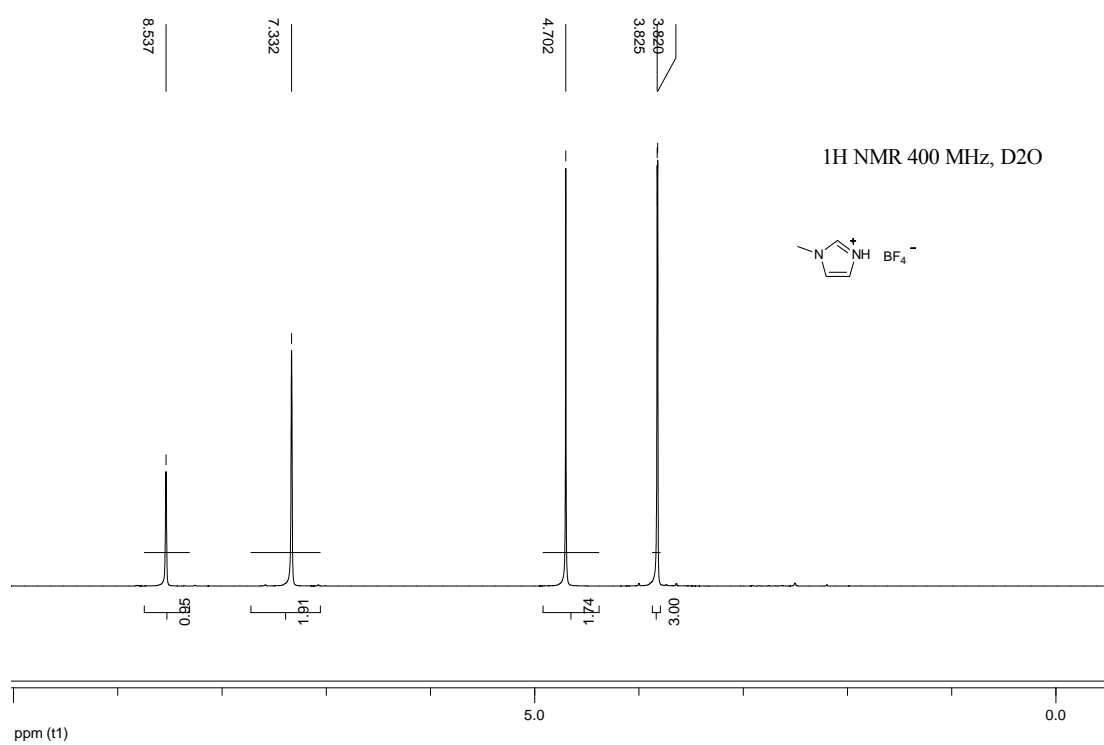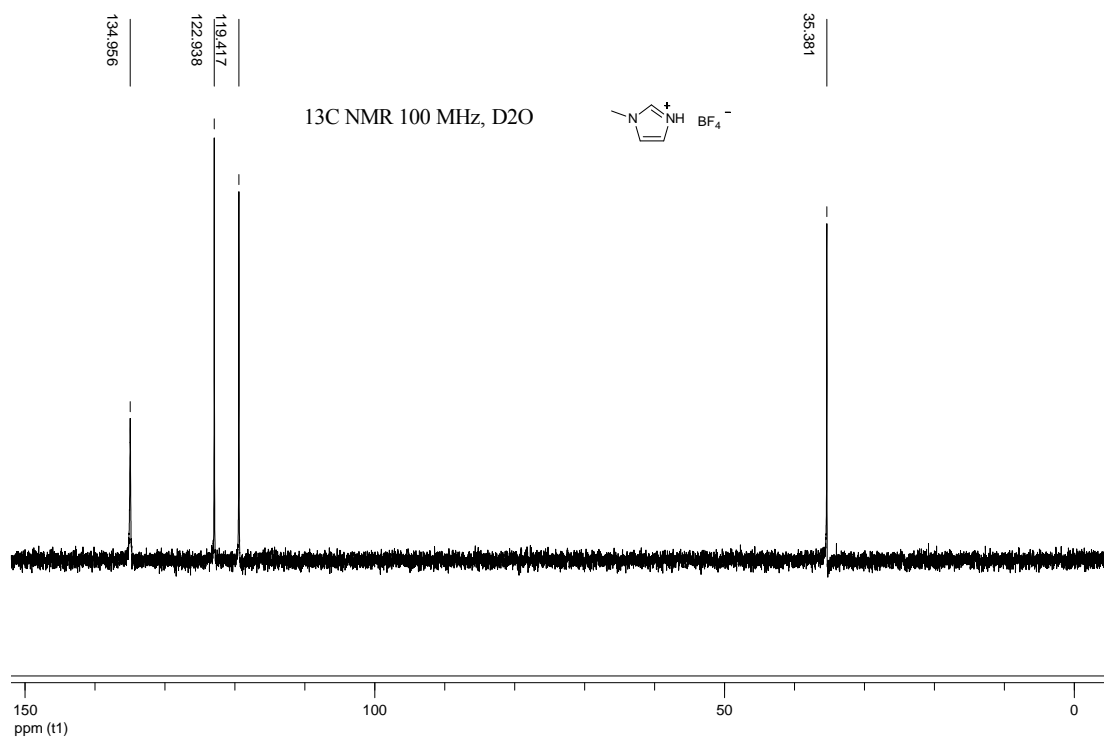

[Hmim]OTs

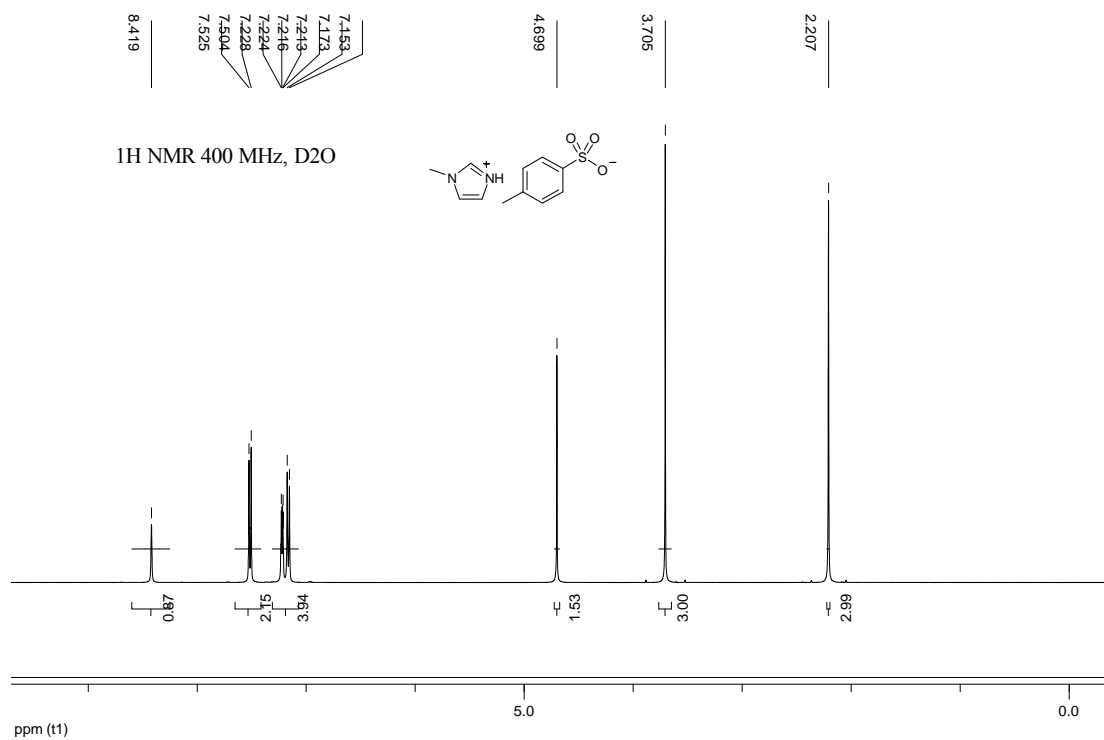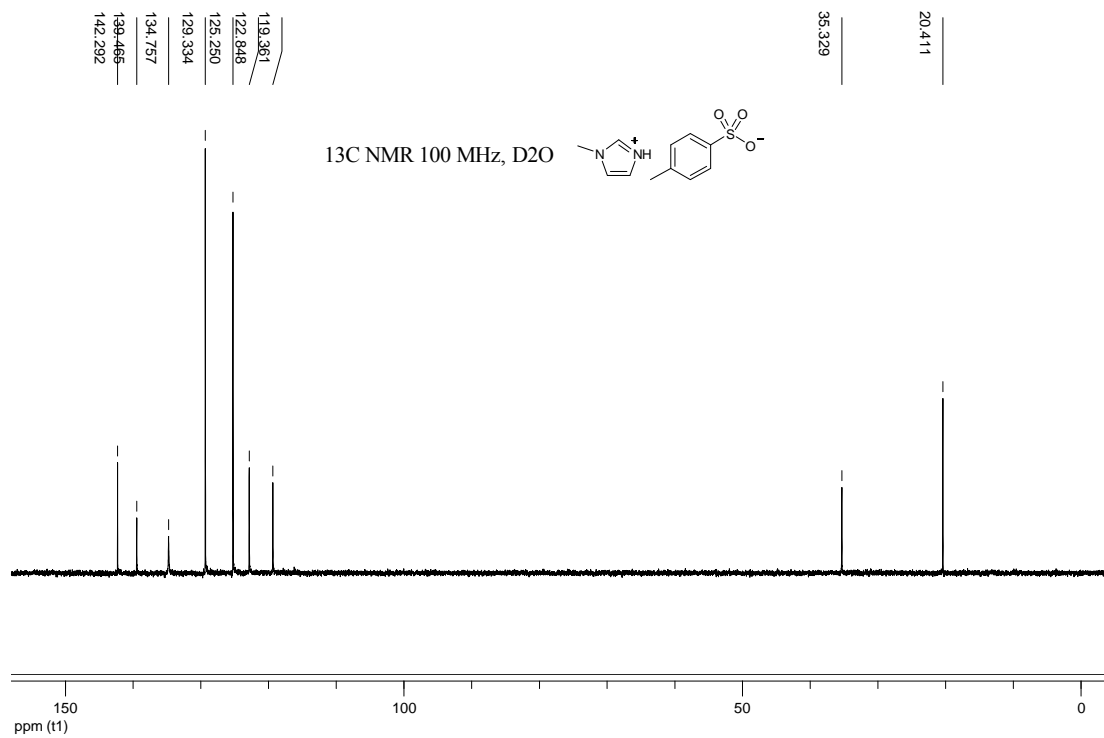

[Bmim]BF<sub>4</sub>

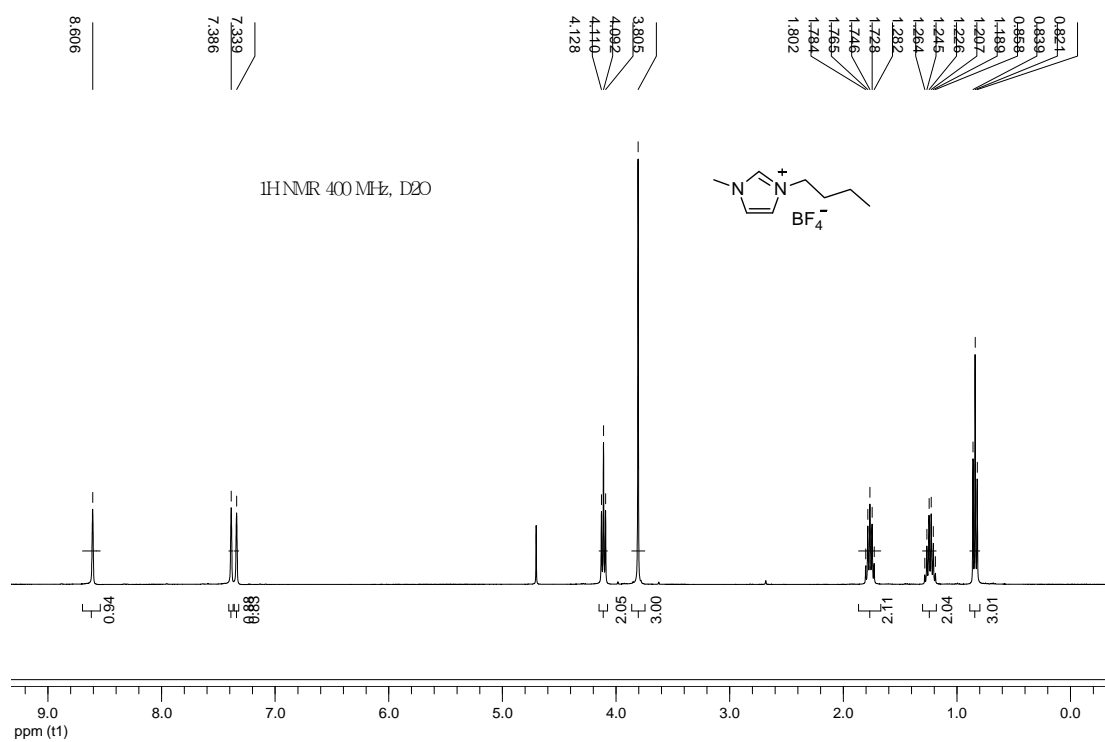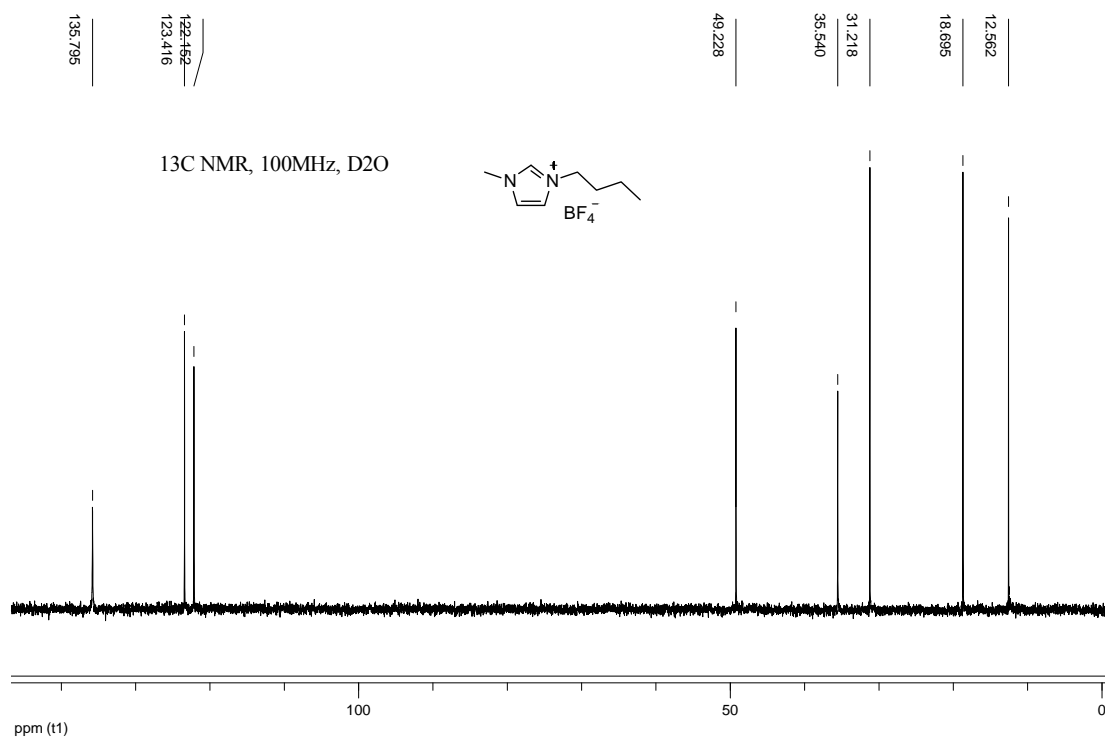



[Bmim]PF<sub>6</sub>

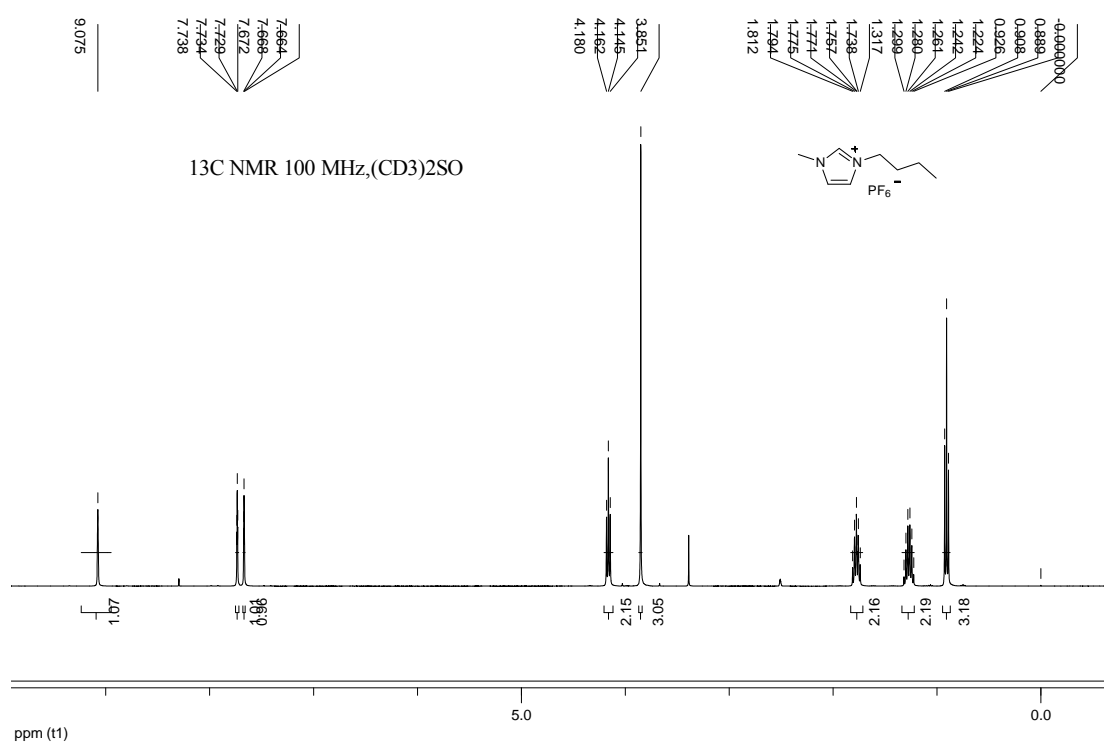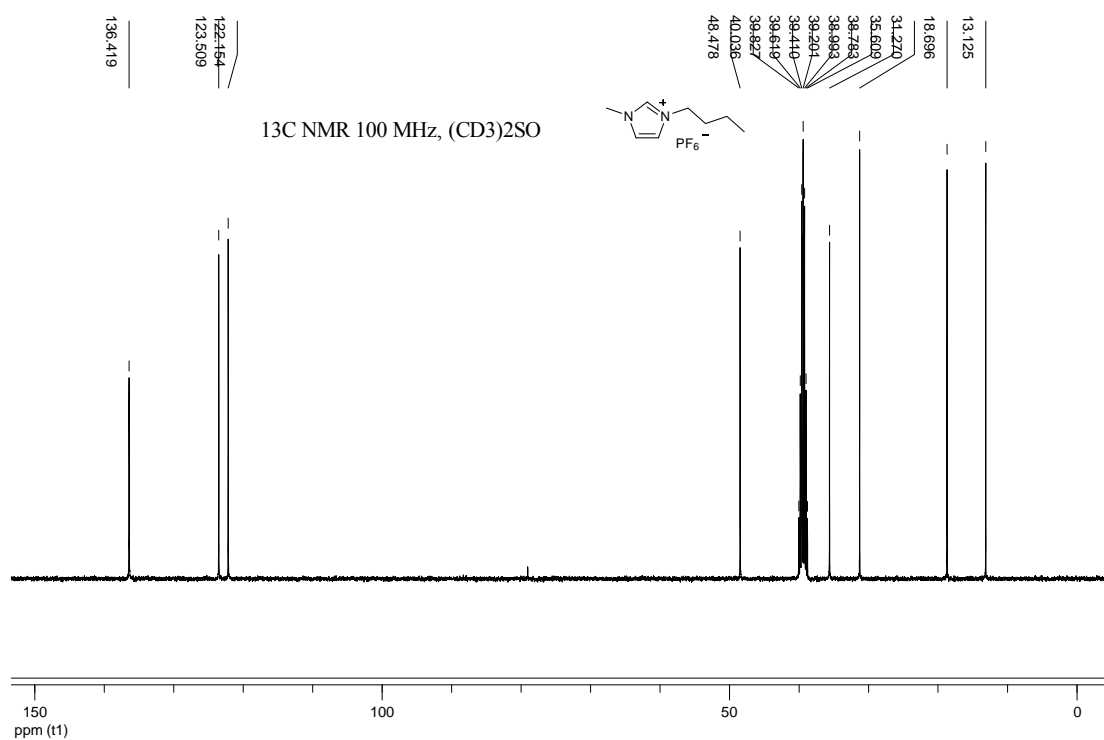

PyHSO<sub>4</sub>

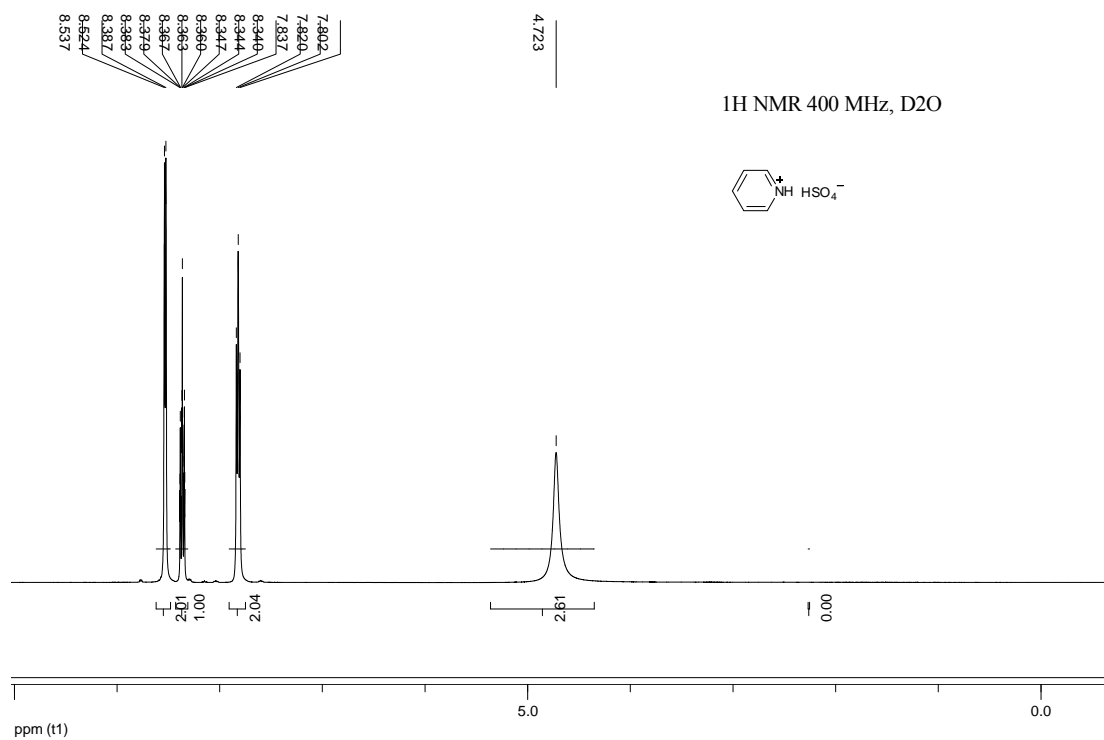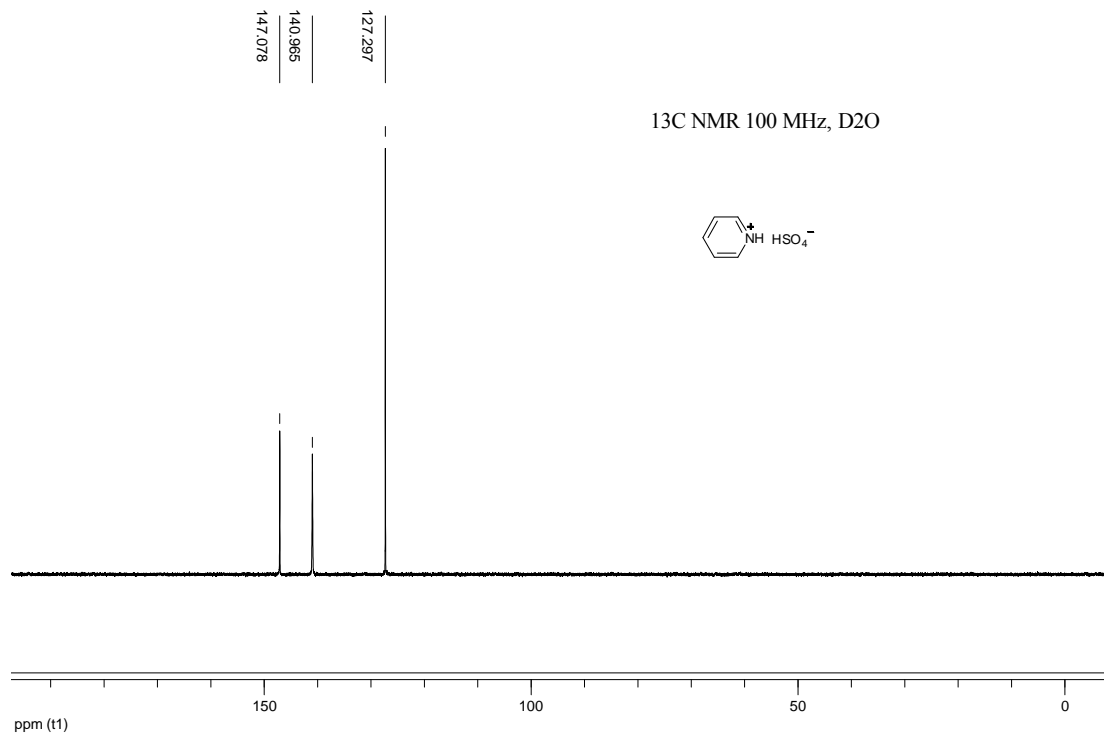

[Hmim]HSO<sub>4</sub>

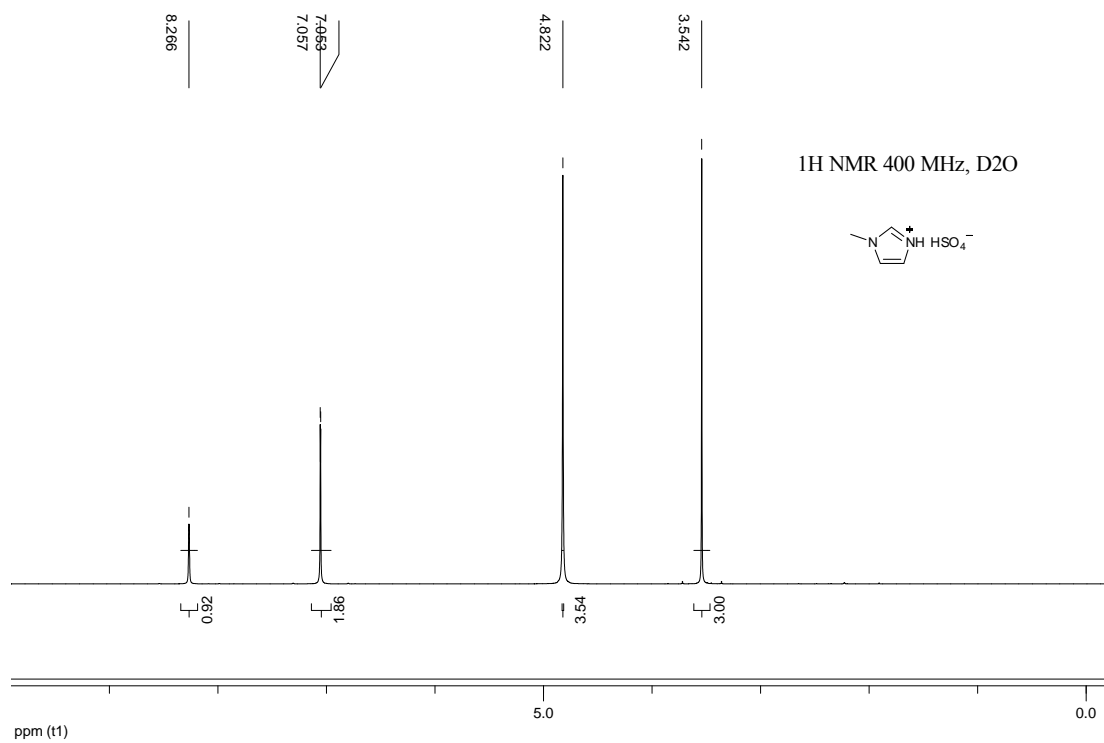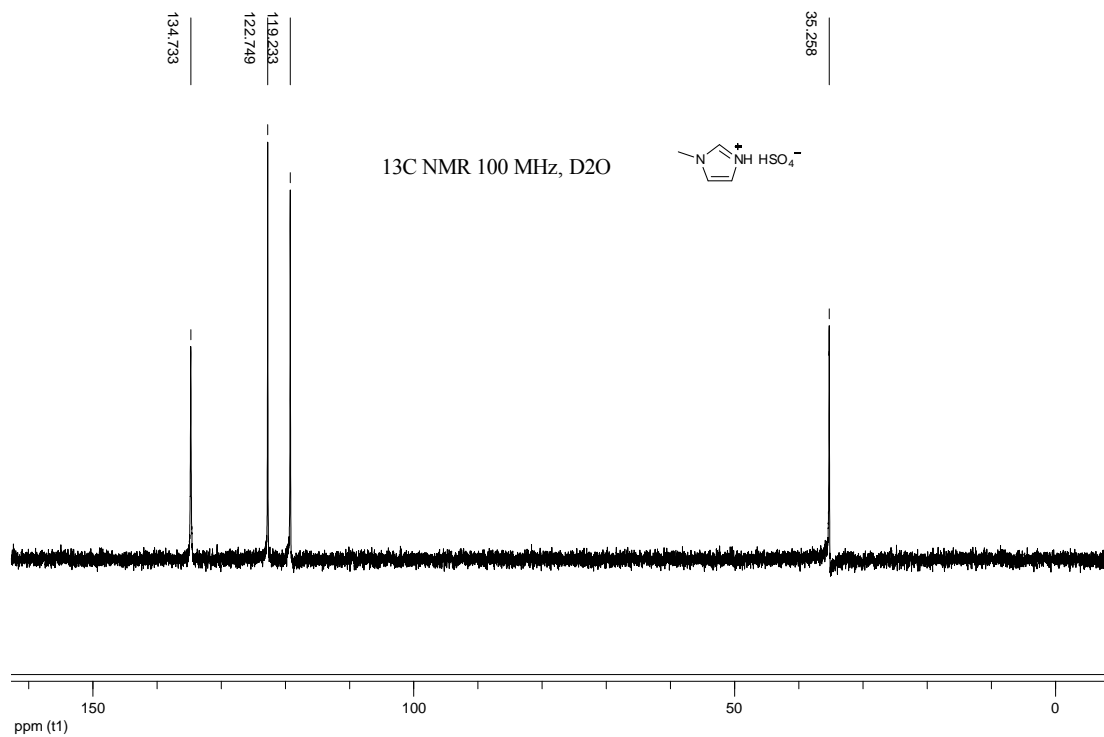

[Bmim]HSO<sub>4</sub>

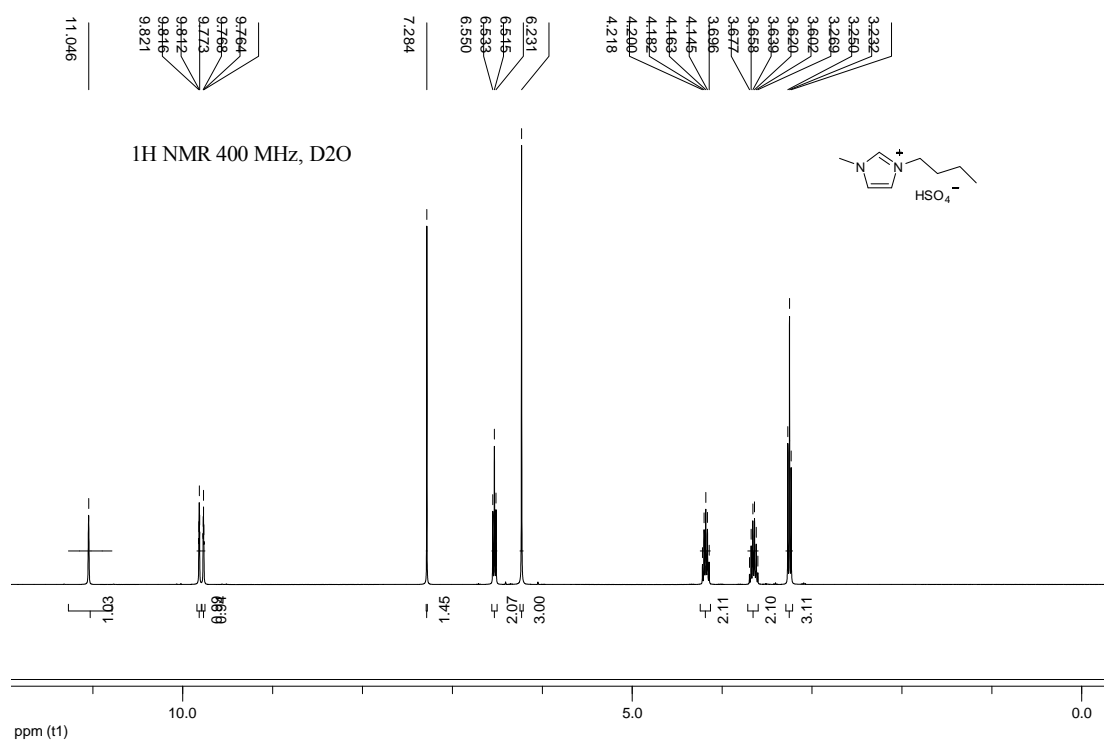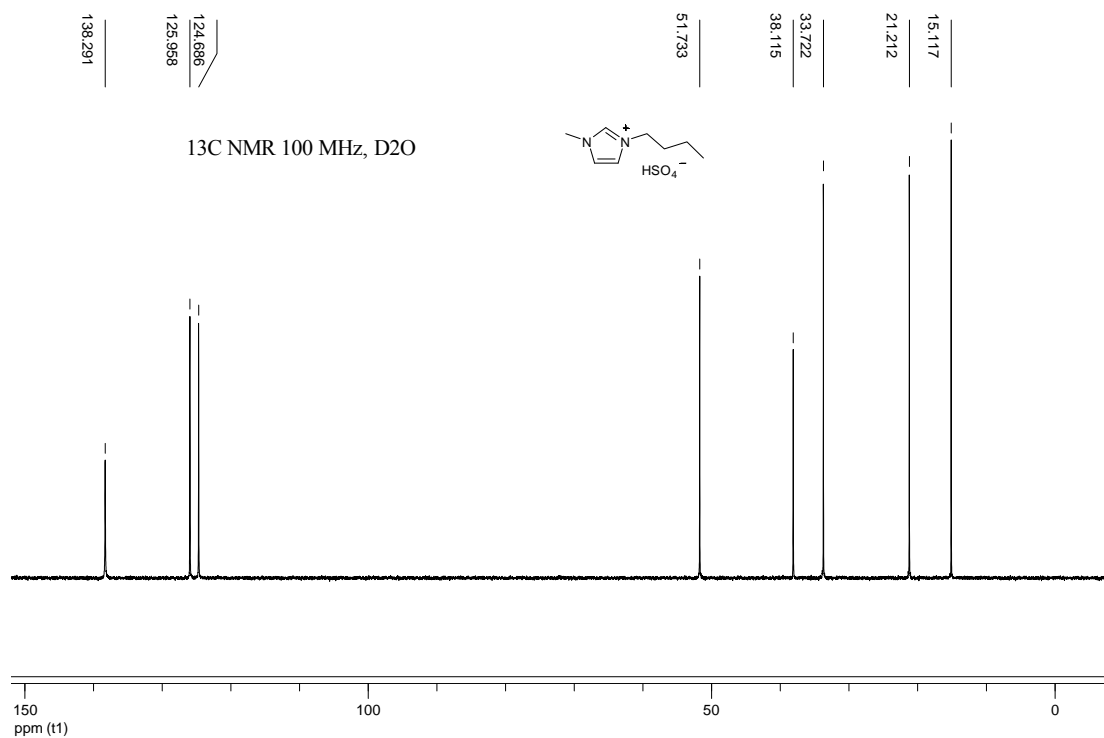

[Bsmim]HSO<sub>4</sub>

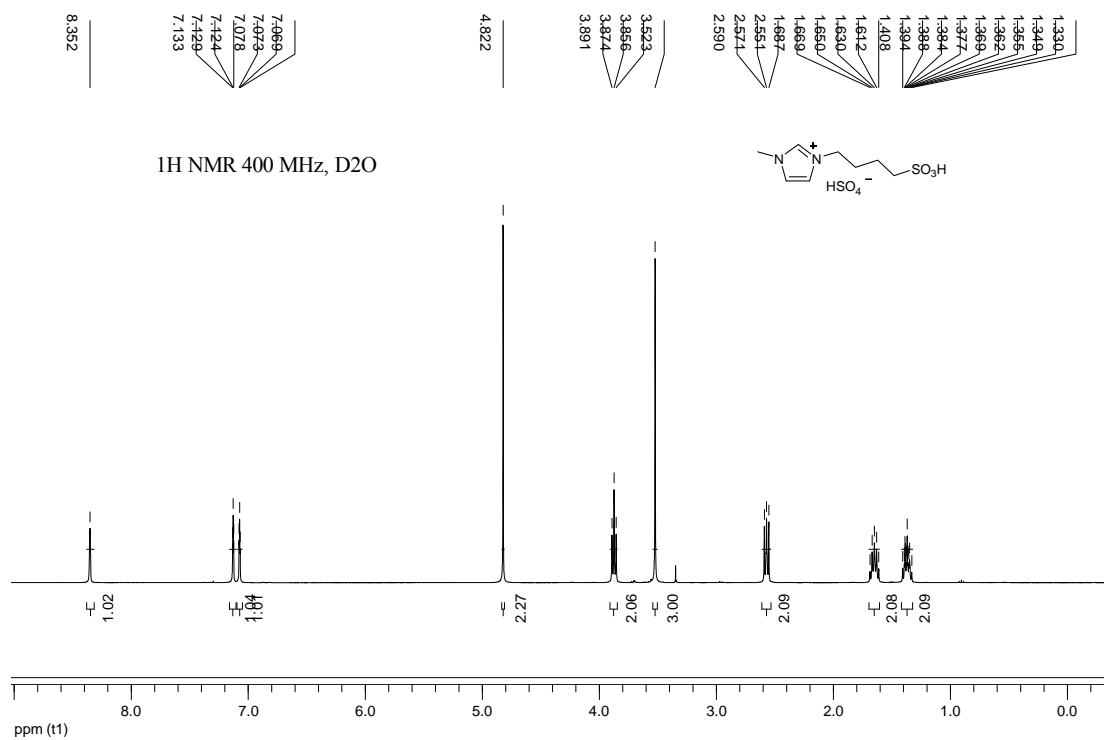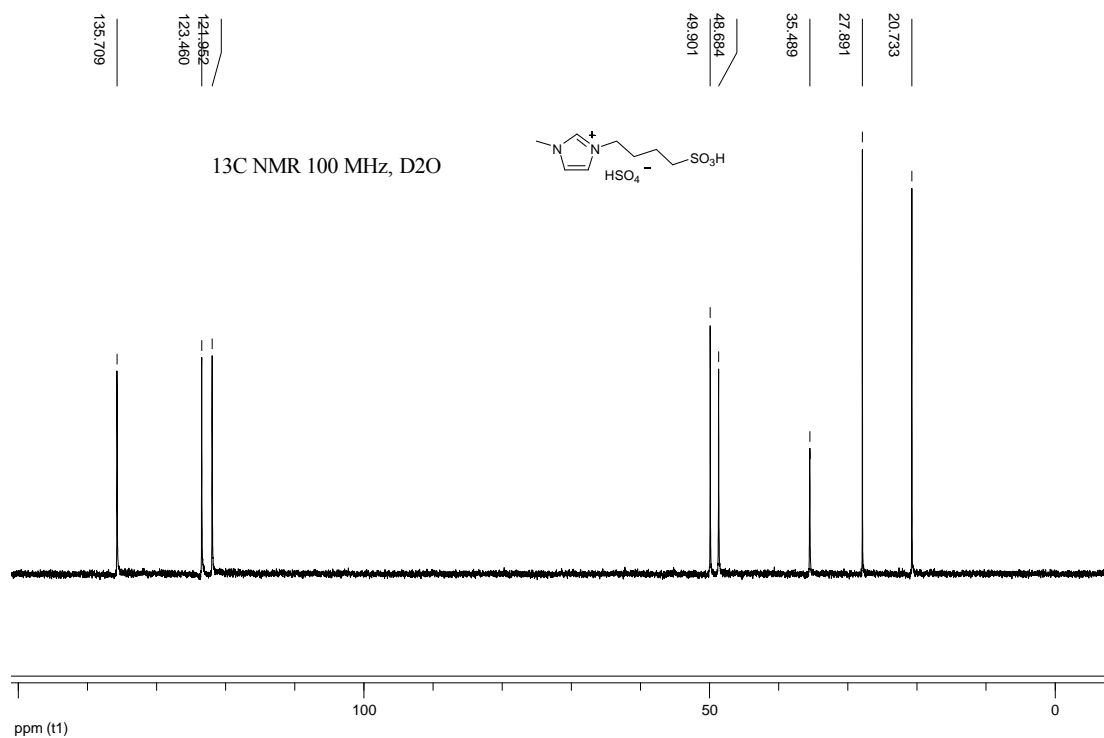

Supplement: c1ob06346d.pdf [file c1ob06346d.pdf]
